# Supplementary material
Source: PubMed Central journal article supplement (PMC5985520)
Supplement: NIHMS970427-supplement-Supplemental_Information.pdf [file NIHMS970427-supplement-Supplemental_Information.pdf]

## Supporting Information

### Modular Synthesis of Biologically Active Phosphatidic Acid Probes Using Click Chemistry

Matthew D. Smith,<sup>a</sup> Christopher G. Sudhakar,<sup>b</sup> Denghuang Gong,<sup>a</sup> Robert V. Stahelin,<sup>b,c</sup> and Michael D.

Best\*<sup>a</sup> <sup>a</sup>Department of Chemistry, the University of Tennessee, Knoxville, TN 37996 <sup>b</sup>Department of Biochemistry and Molecular Biology, Indiana University School of Medicine-South Bend, South Bend, IN

46617 <sup>c</sup>Department of Chemistry and Biochemistry and the Walther Center for Cancer Research, University of Notre Dame, Notre Dame, IN 46656

#### Index of Contents:

- I. Protecting Group Strategies Explored for the Interior Diol of Scaffold 2..... S1
- II. NMR Spectra of Synthetic Compounds..... S2-S47
- III. HPLC Traces of Derivatized PA Probes..... S48-S50
- IV. Raw SPR spectrograms..... S51
- V. Protecting Group Strategies Explored for the Interior Diol of Scaffold 2

A key aspect of this synthesis was the determination of the optimal protecting group for the interior diol of **8** that could be removed without affecting the phosphotriester and azide groups. Several approaches were explored to determine that which is most effective. These routes are outlined in Scheme S1, in which the steps that were unsuccessful are indicated. First, the installation of two *p*-methoxybenzyl protecting groups onto the diol of **3** to **S1** was ineffective. While two silyl protecting groups could be introduced following literature procedures<sup>1,2</sup> to **S2**, these were removed during ester reduction in attempting to access **S3**. However, the introduction of two silyl groups onto the diol of **S4** to access **S5** was unsuccessful. While *p*-methoxybenzylidene-protected derivative **S6** was synthesized, all oxidation conditions attempted for the production of phosphotriester **S7** led to removal of this group. Bissilylation of **S8** to **S9** was once again unsuccessful. Finally, deprotection of the acetonide group of **S10** under acidic conditions yielded only ~10% of diol **9** due to decomposition.

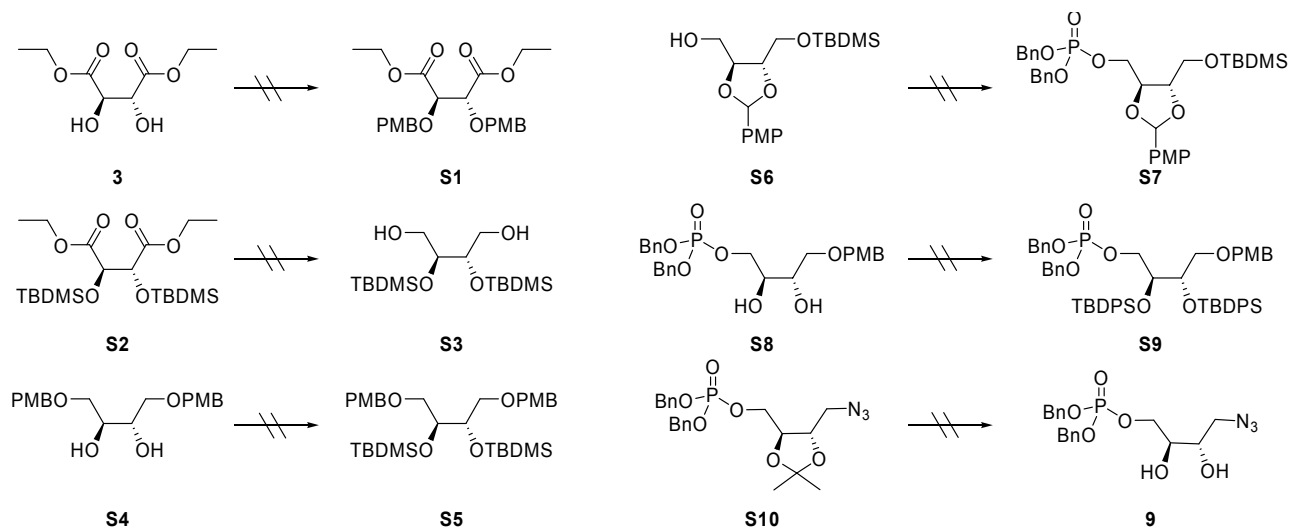

Scheme S1. Protecting group strategies explored in the synthesis of modular PA core 2.

#### References Cited

- 1 J. E. Baldwin; R. M. Adlington; A. T. Russell; M. L. Smith. *J. Chem. Soc., Chem. Commun.* 1994, 85- 86.
- 2 T. Hiyama; T. Minami; K. Takahashi. *Bull. Chem. Soc. Japan* 1995, **68**, 364-372.

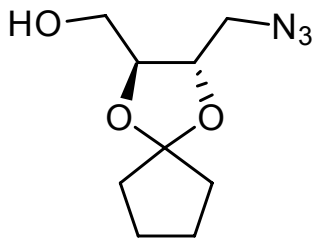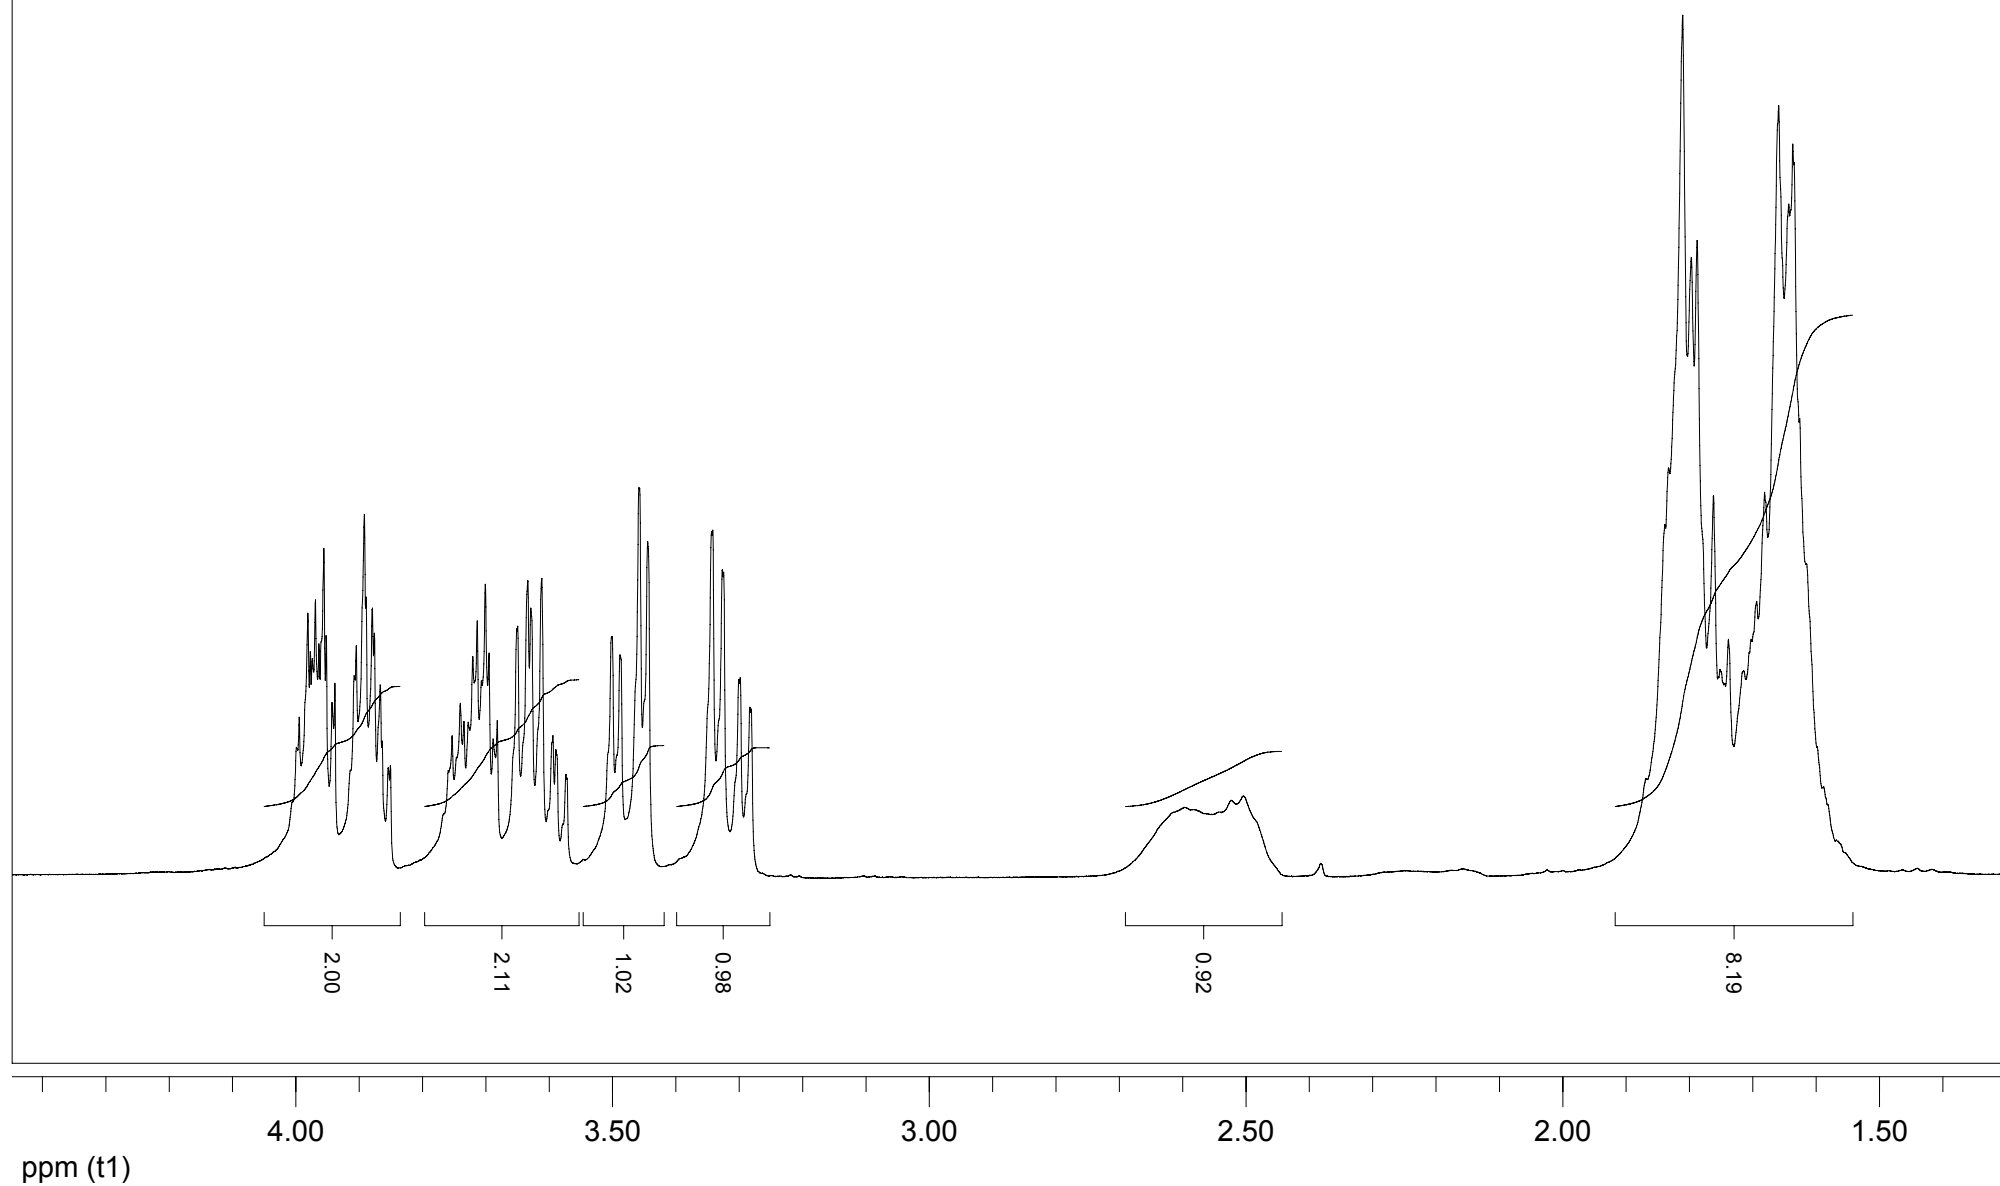

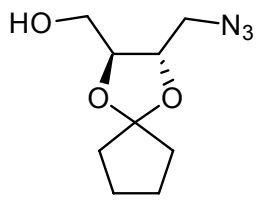

119.828

78.543

76.066

62.035

52.011

37.291

37.211

23.496

23.306

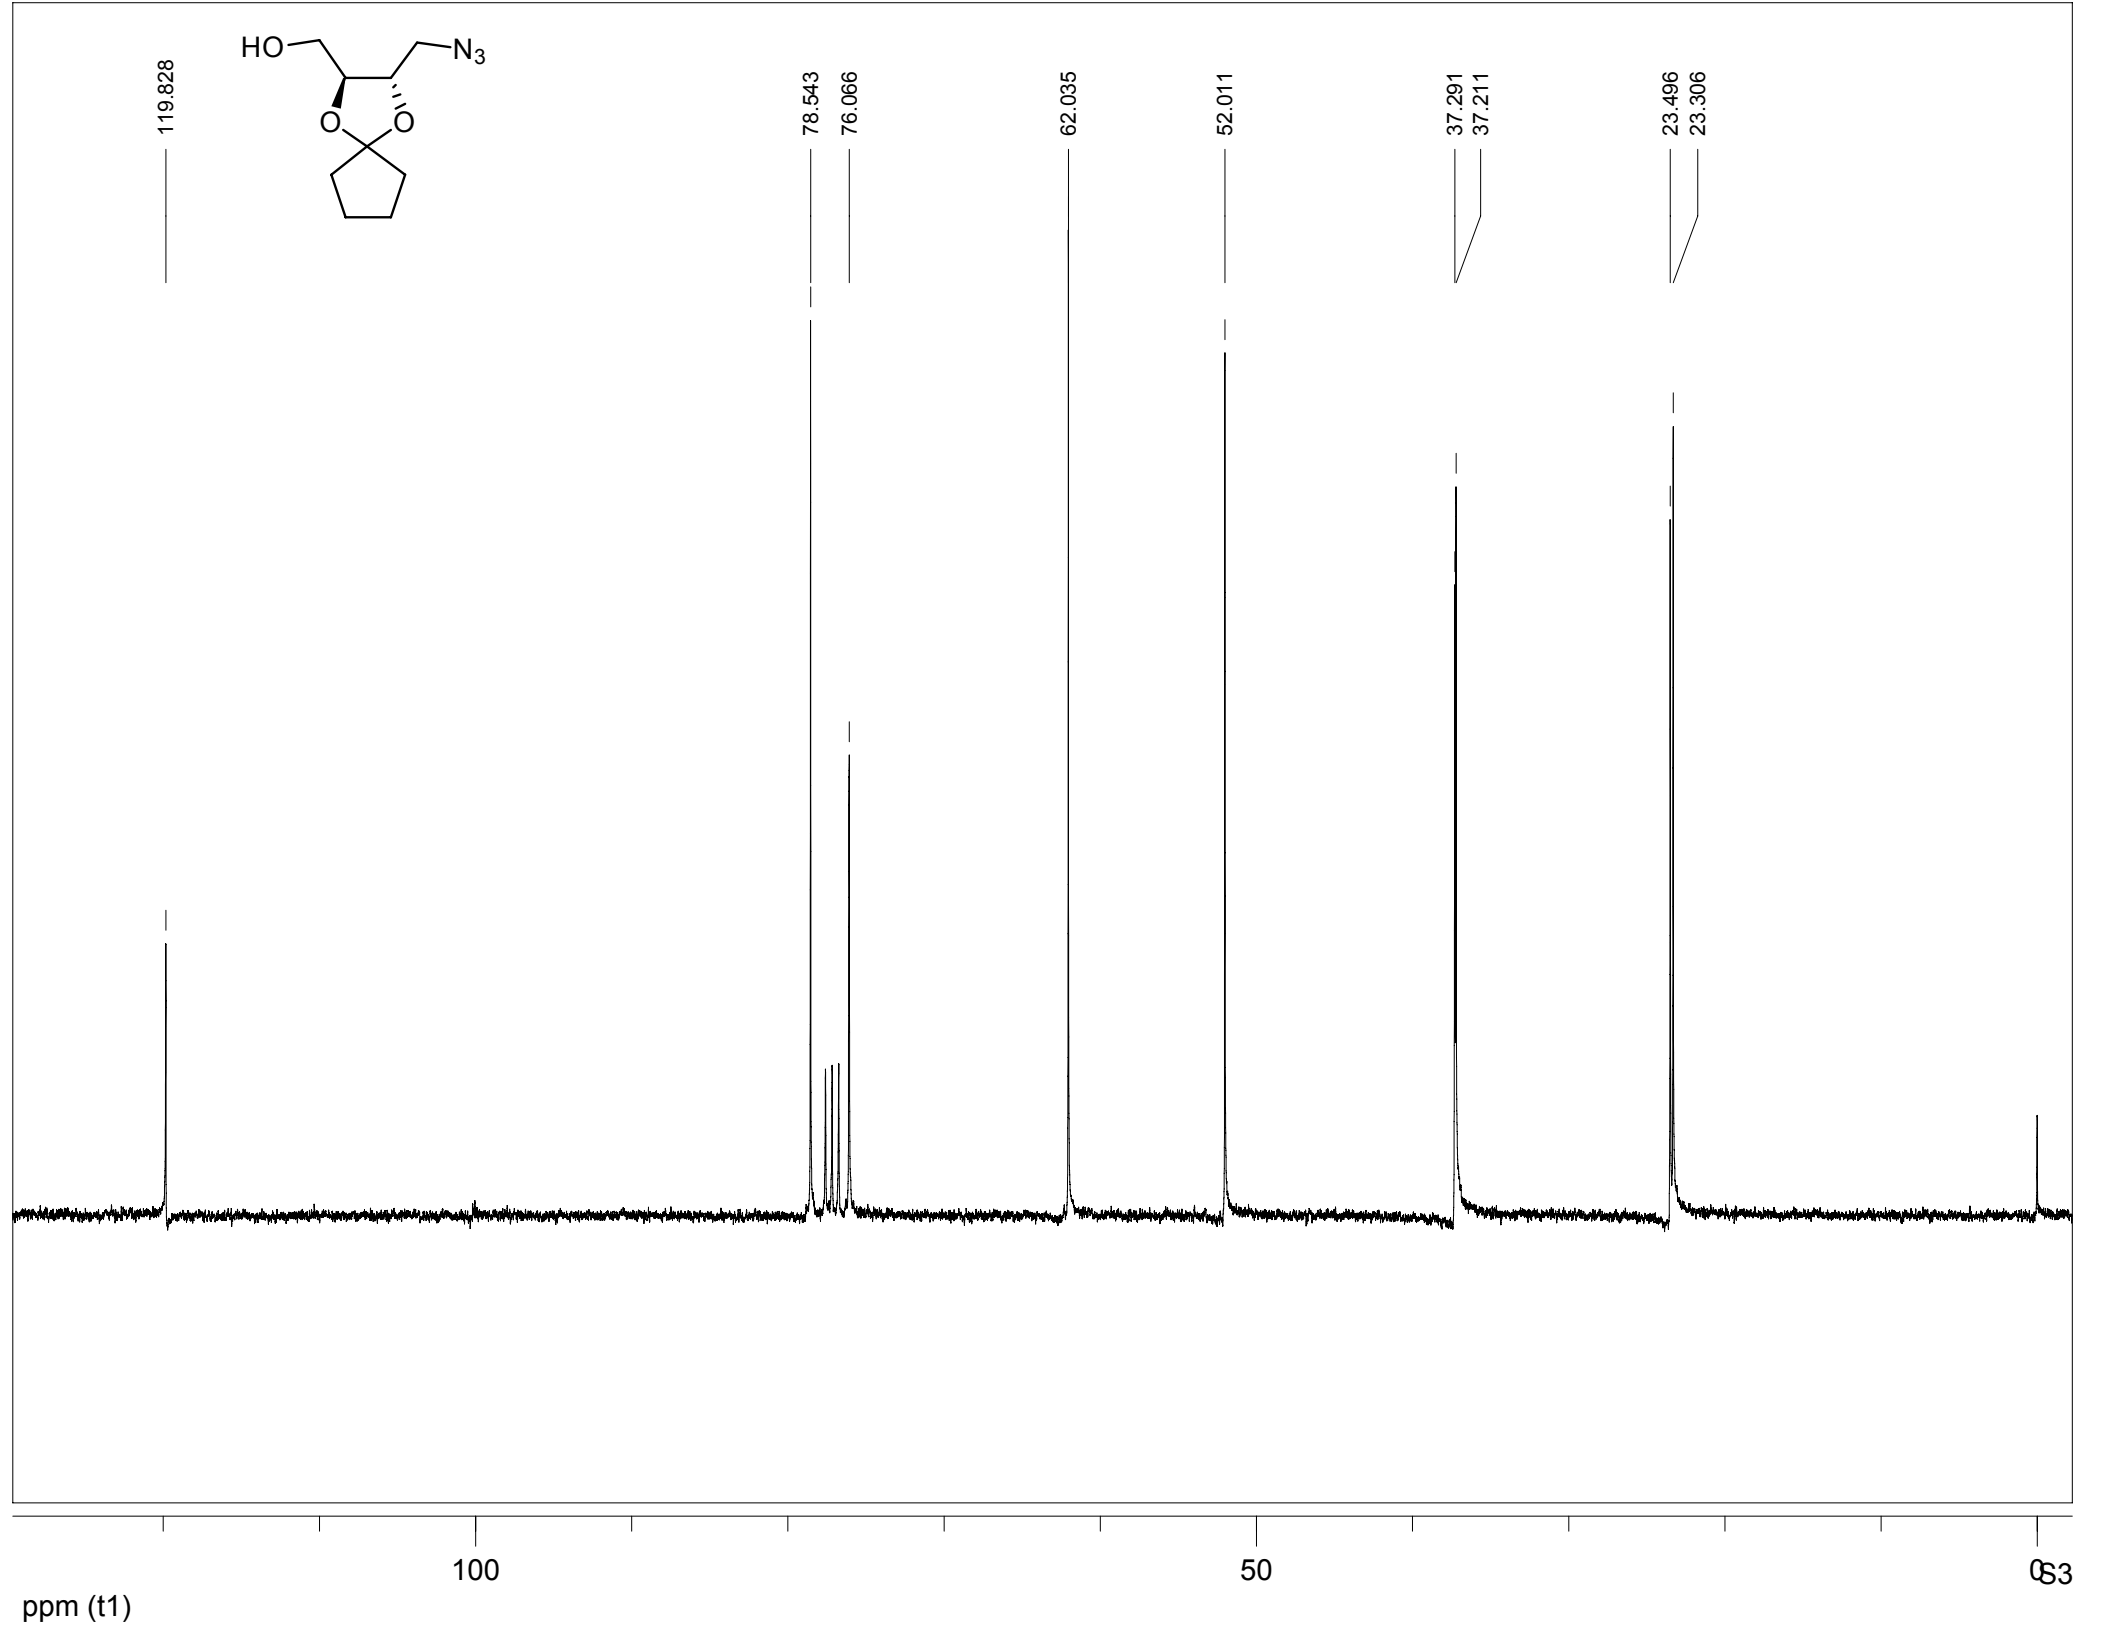

ppm (t1)

100

50

0

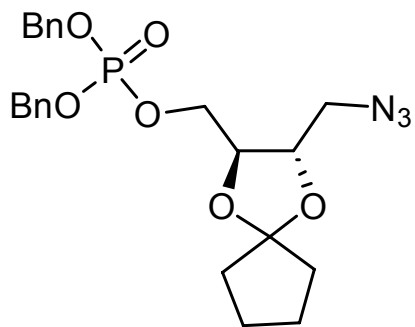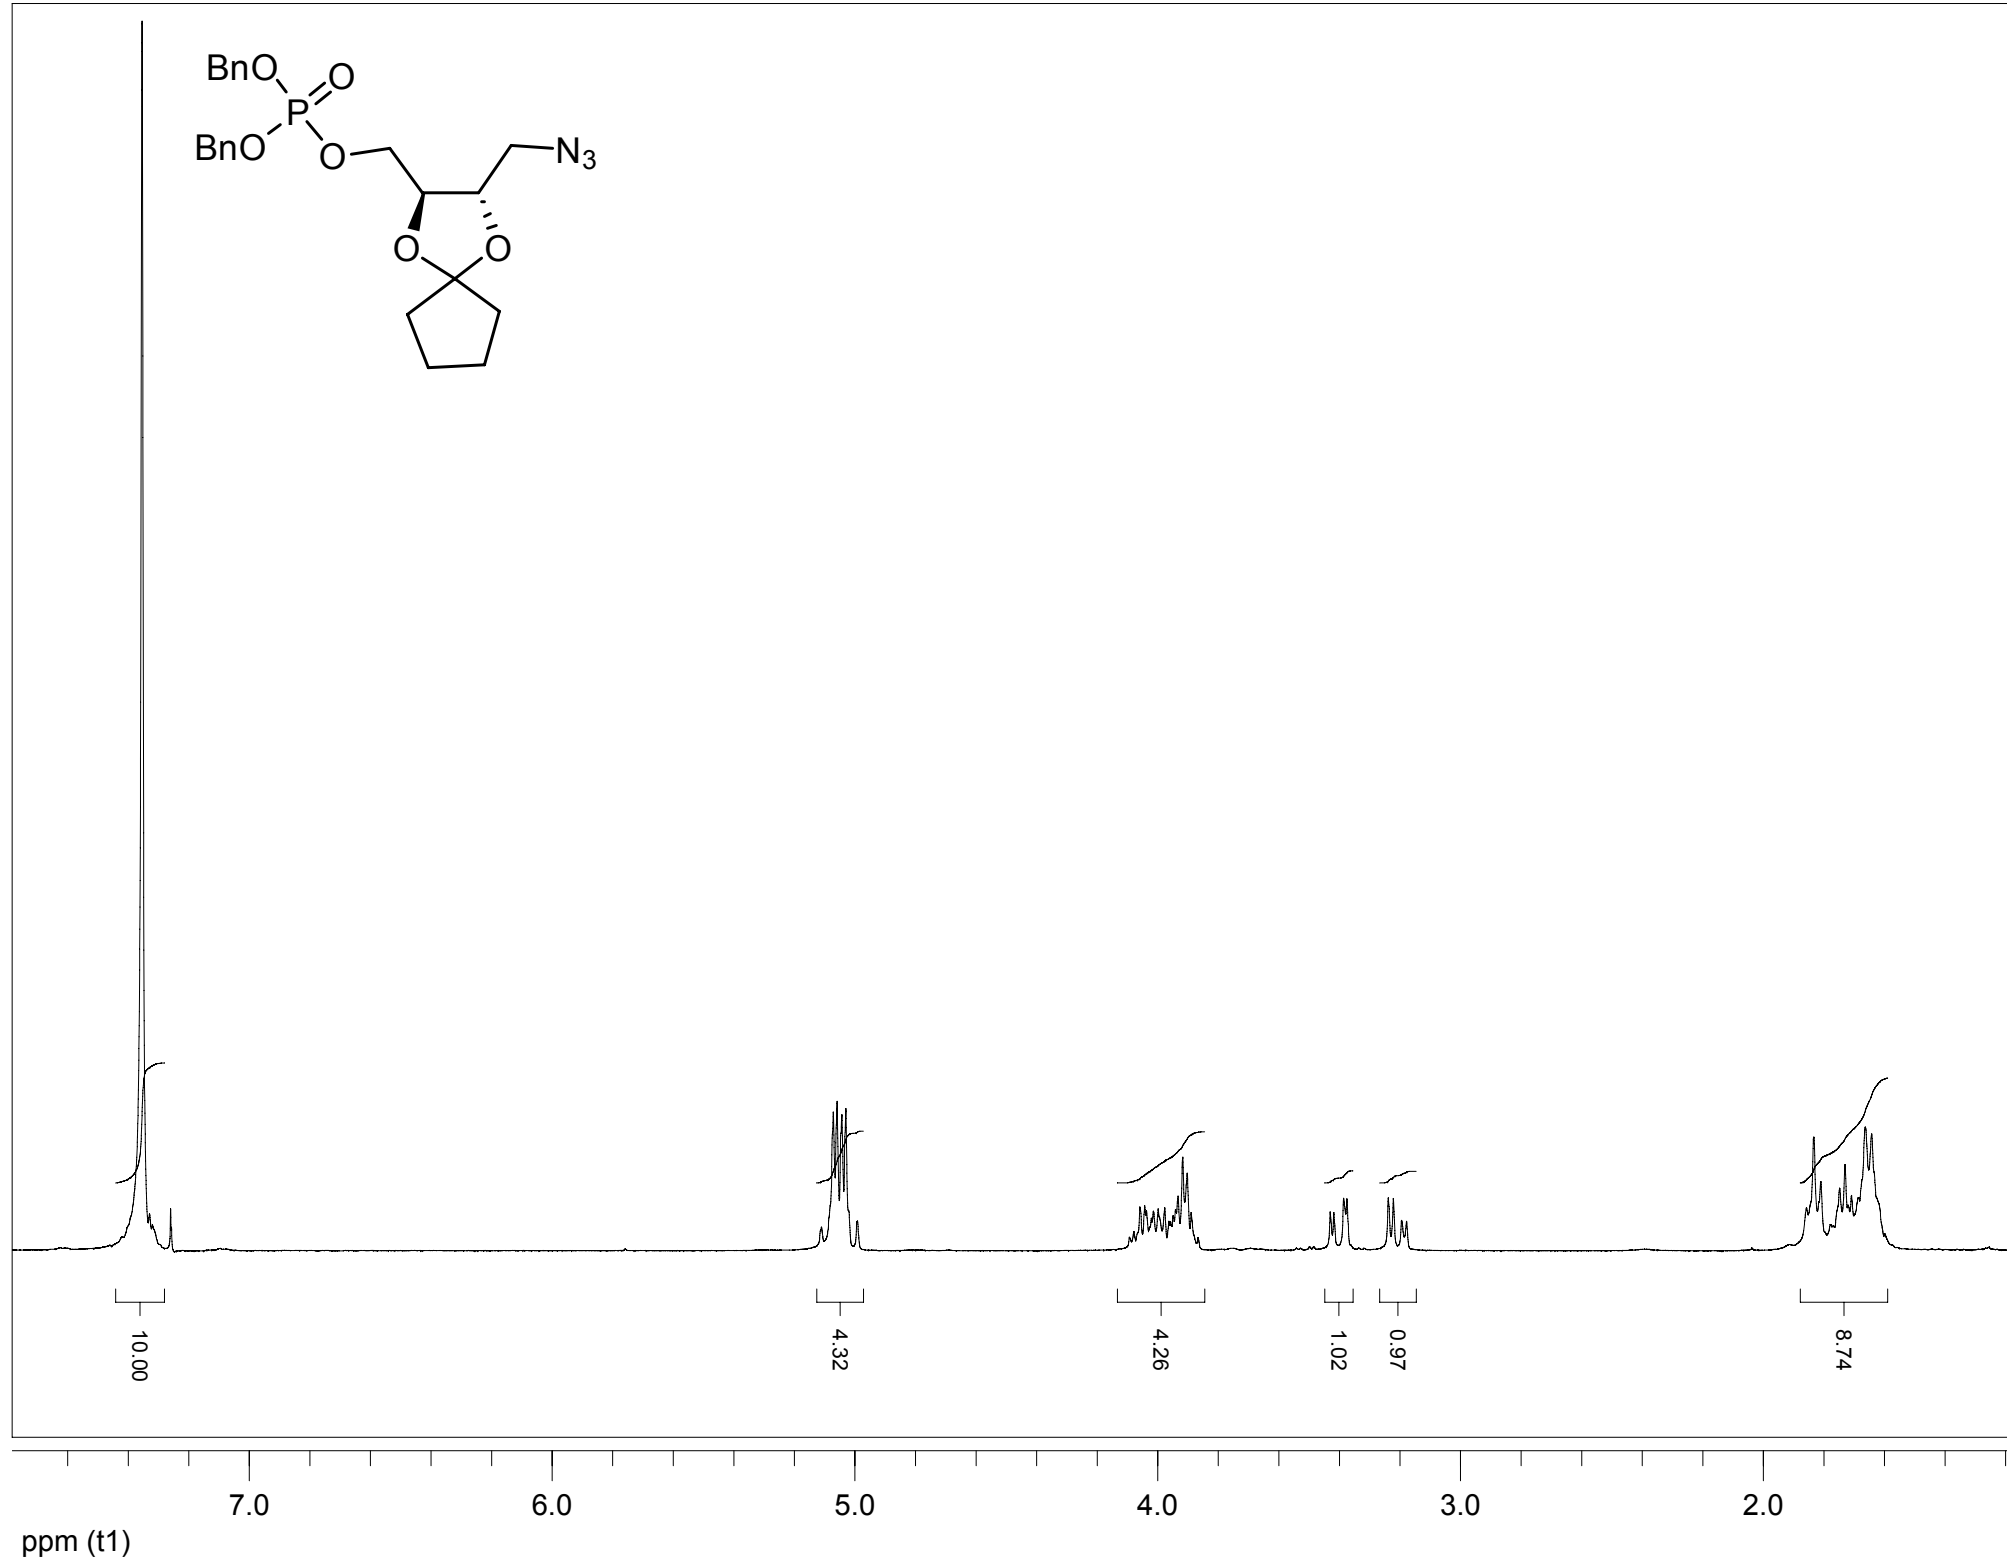



135.642  
135.557  
128.677  
128.626  
128.038  
120.234

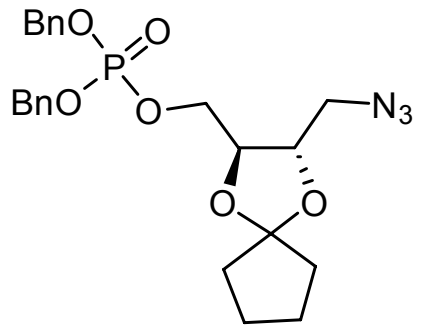

76.780  
75.967  
75.855  
69.547  
69.474  
66.673  
66.598

51.788

37.278  
37.086

23.454  
23.360

0 S5

ppm (t1)

100

50

0

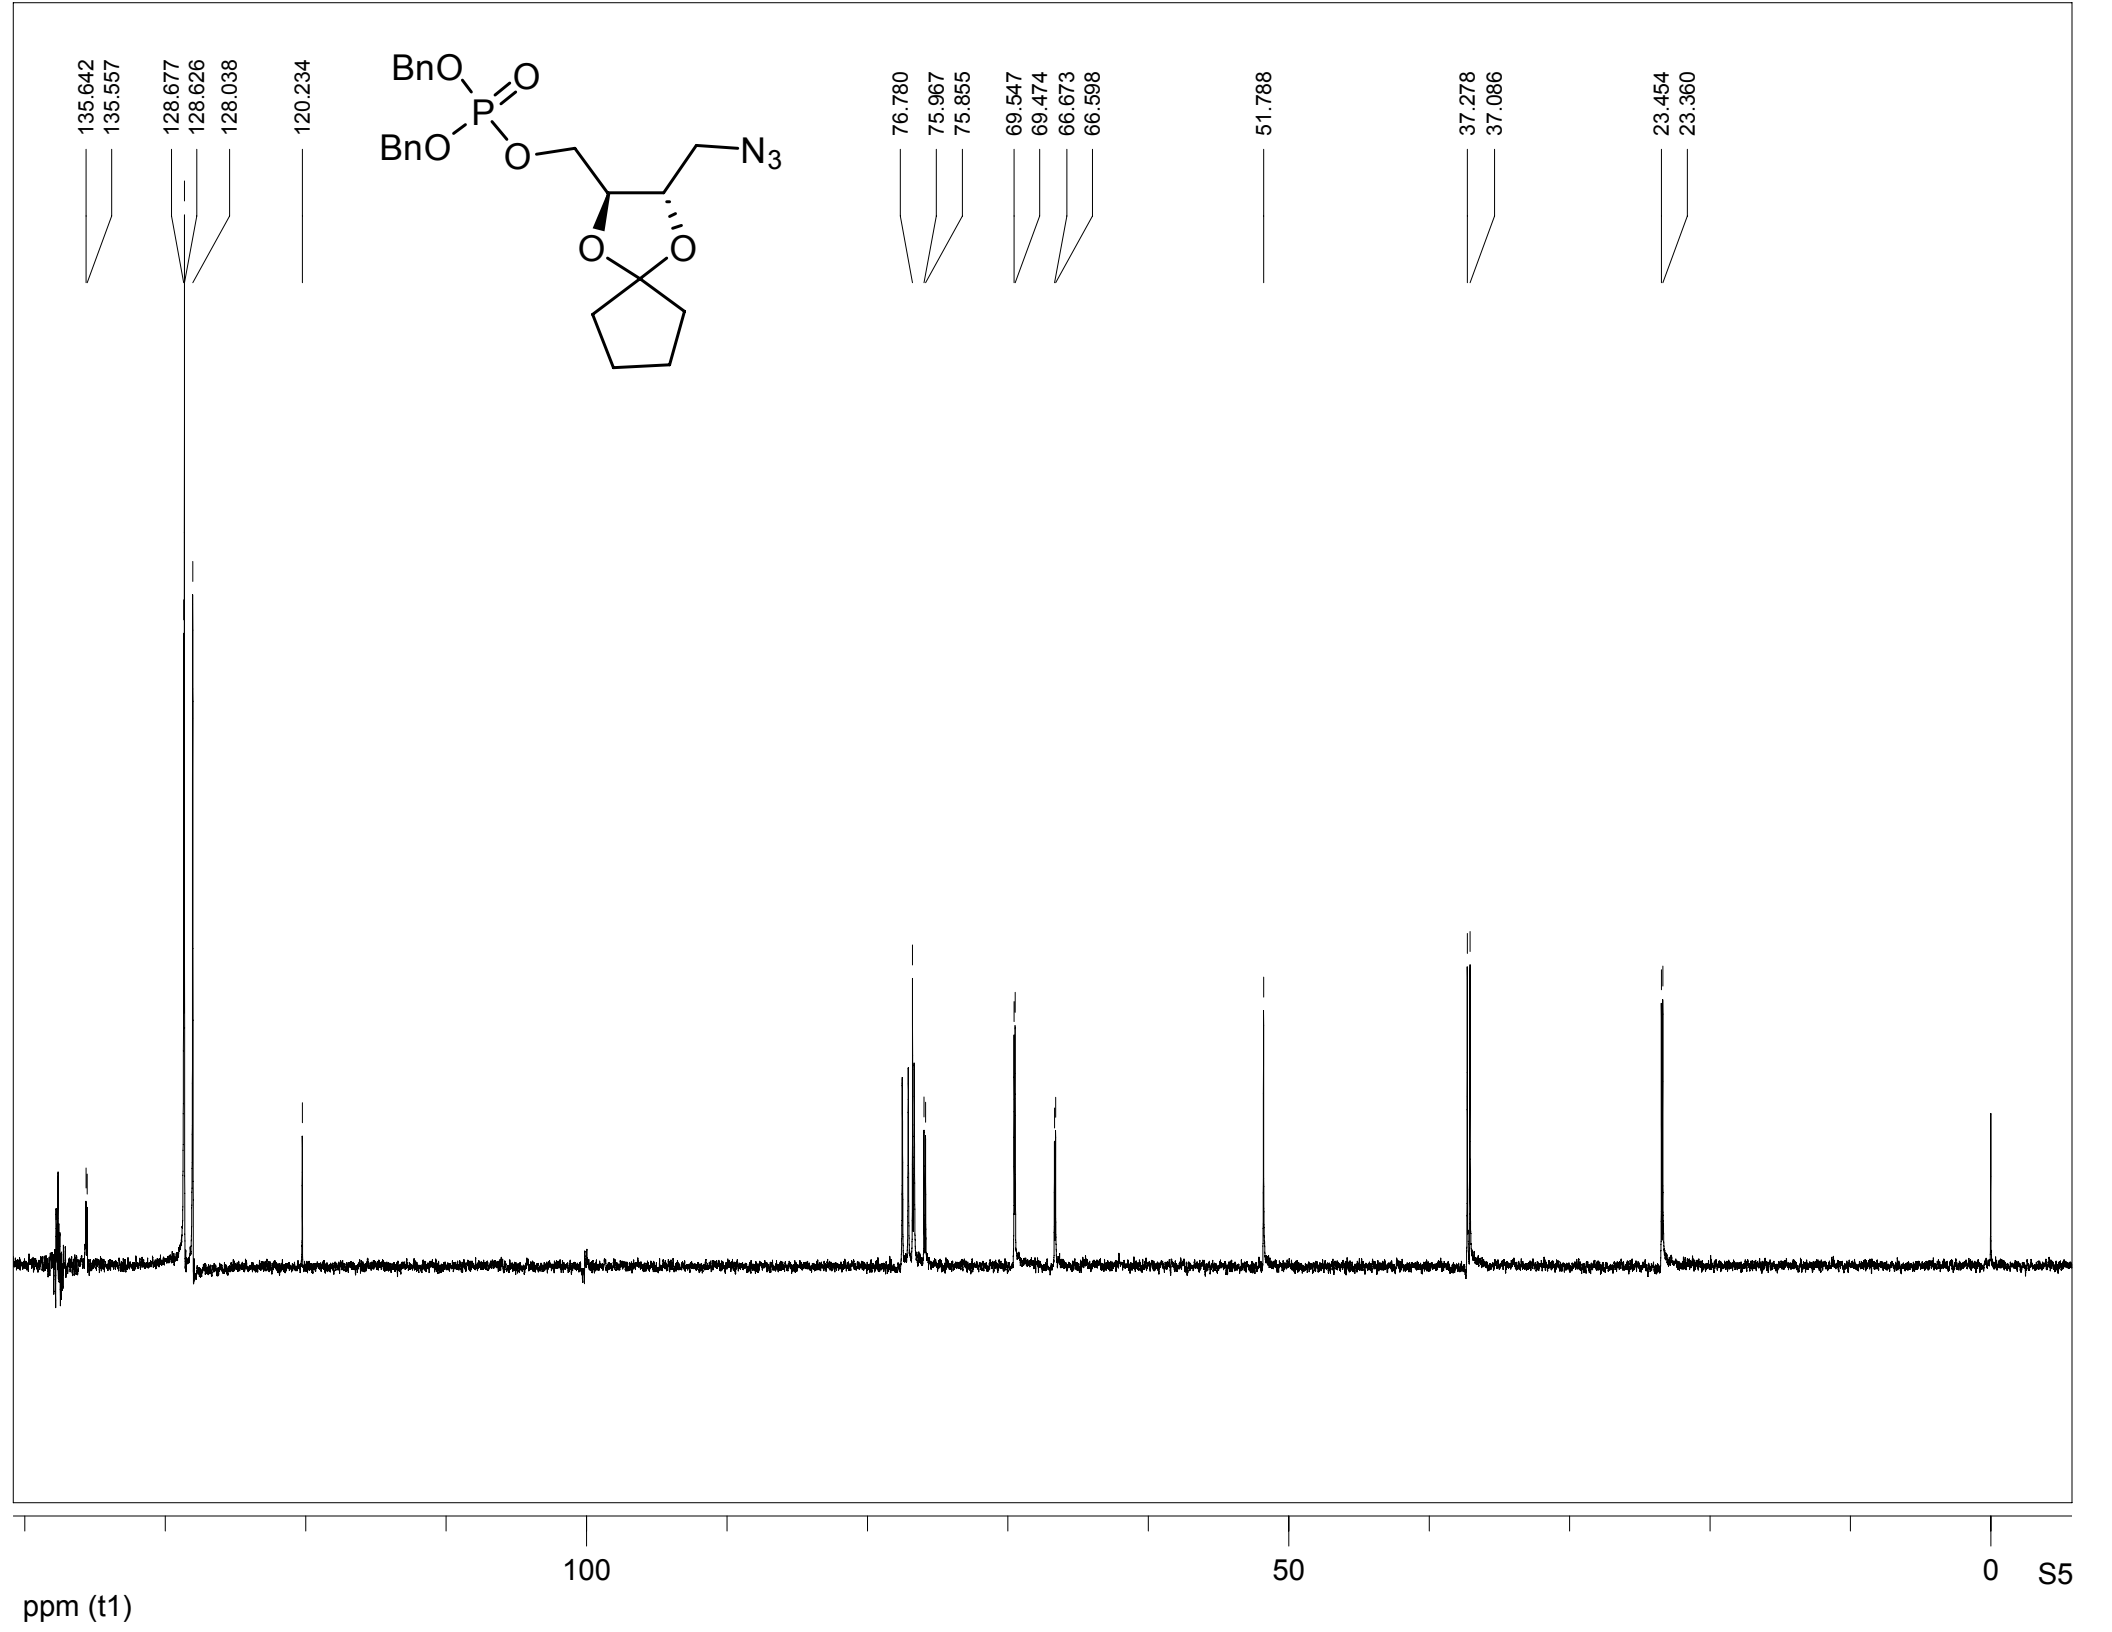

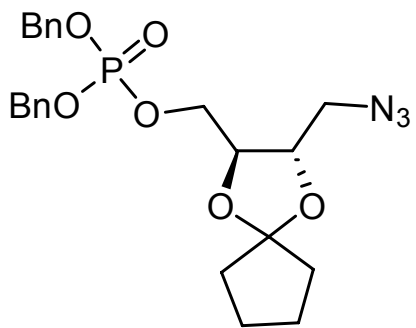

0.143

ppm (t1)

5.0

0.0

-5.0

S6

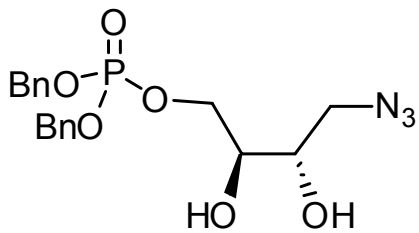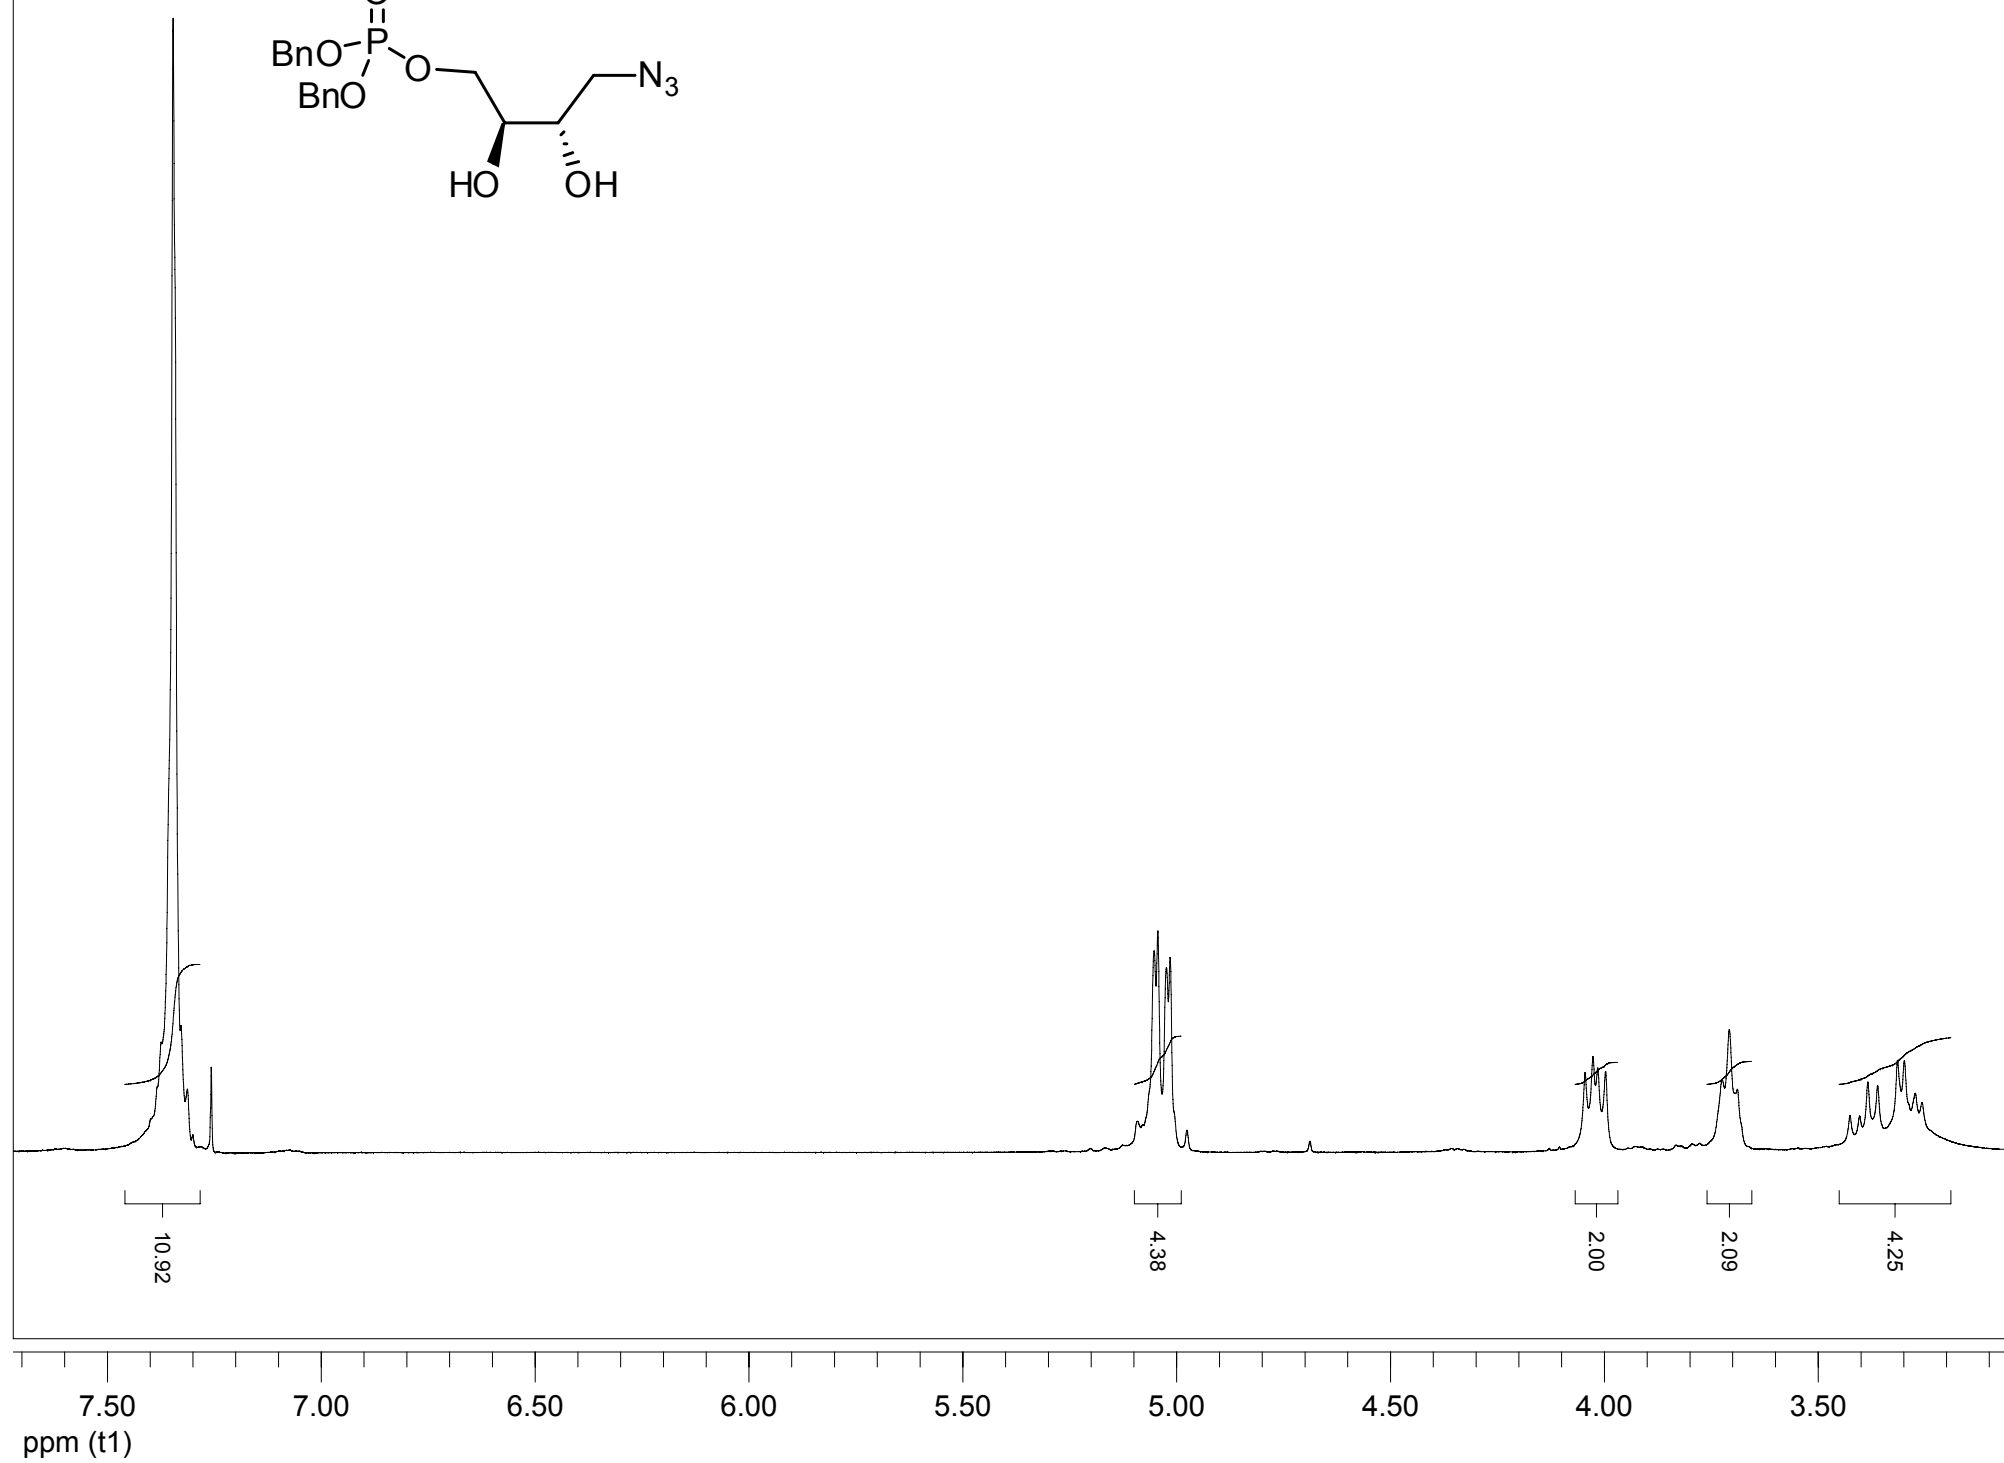

135.295  
135.210  
128.709  
128.588  
127.989

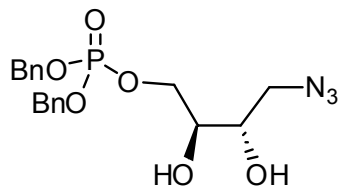

70.091  
70.012  
69.784  
69.709  
69.581  
68.444  
68.365

53.195

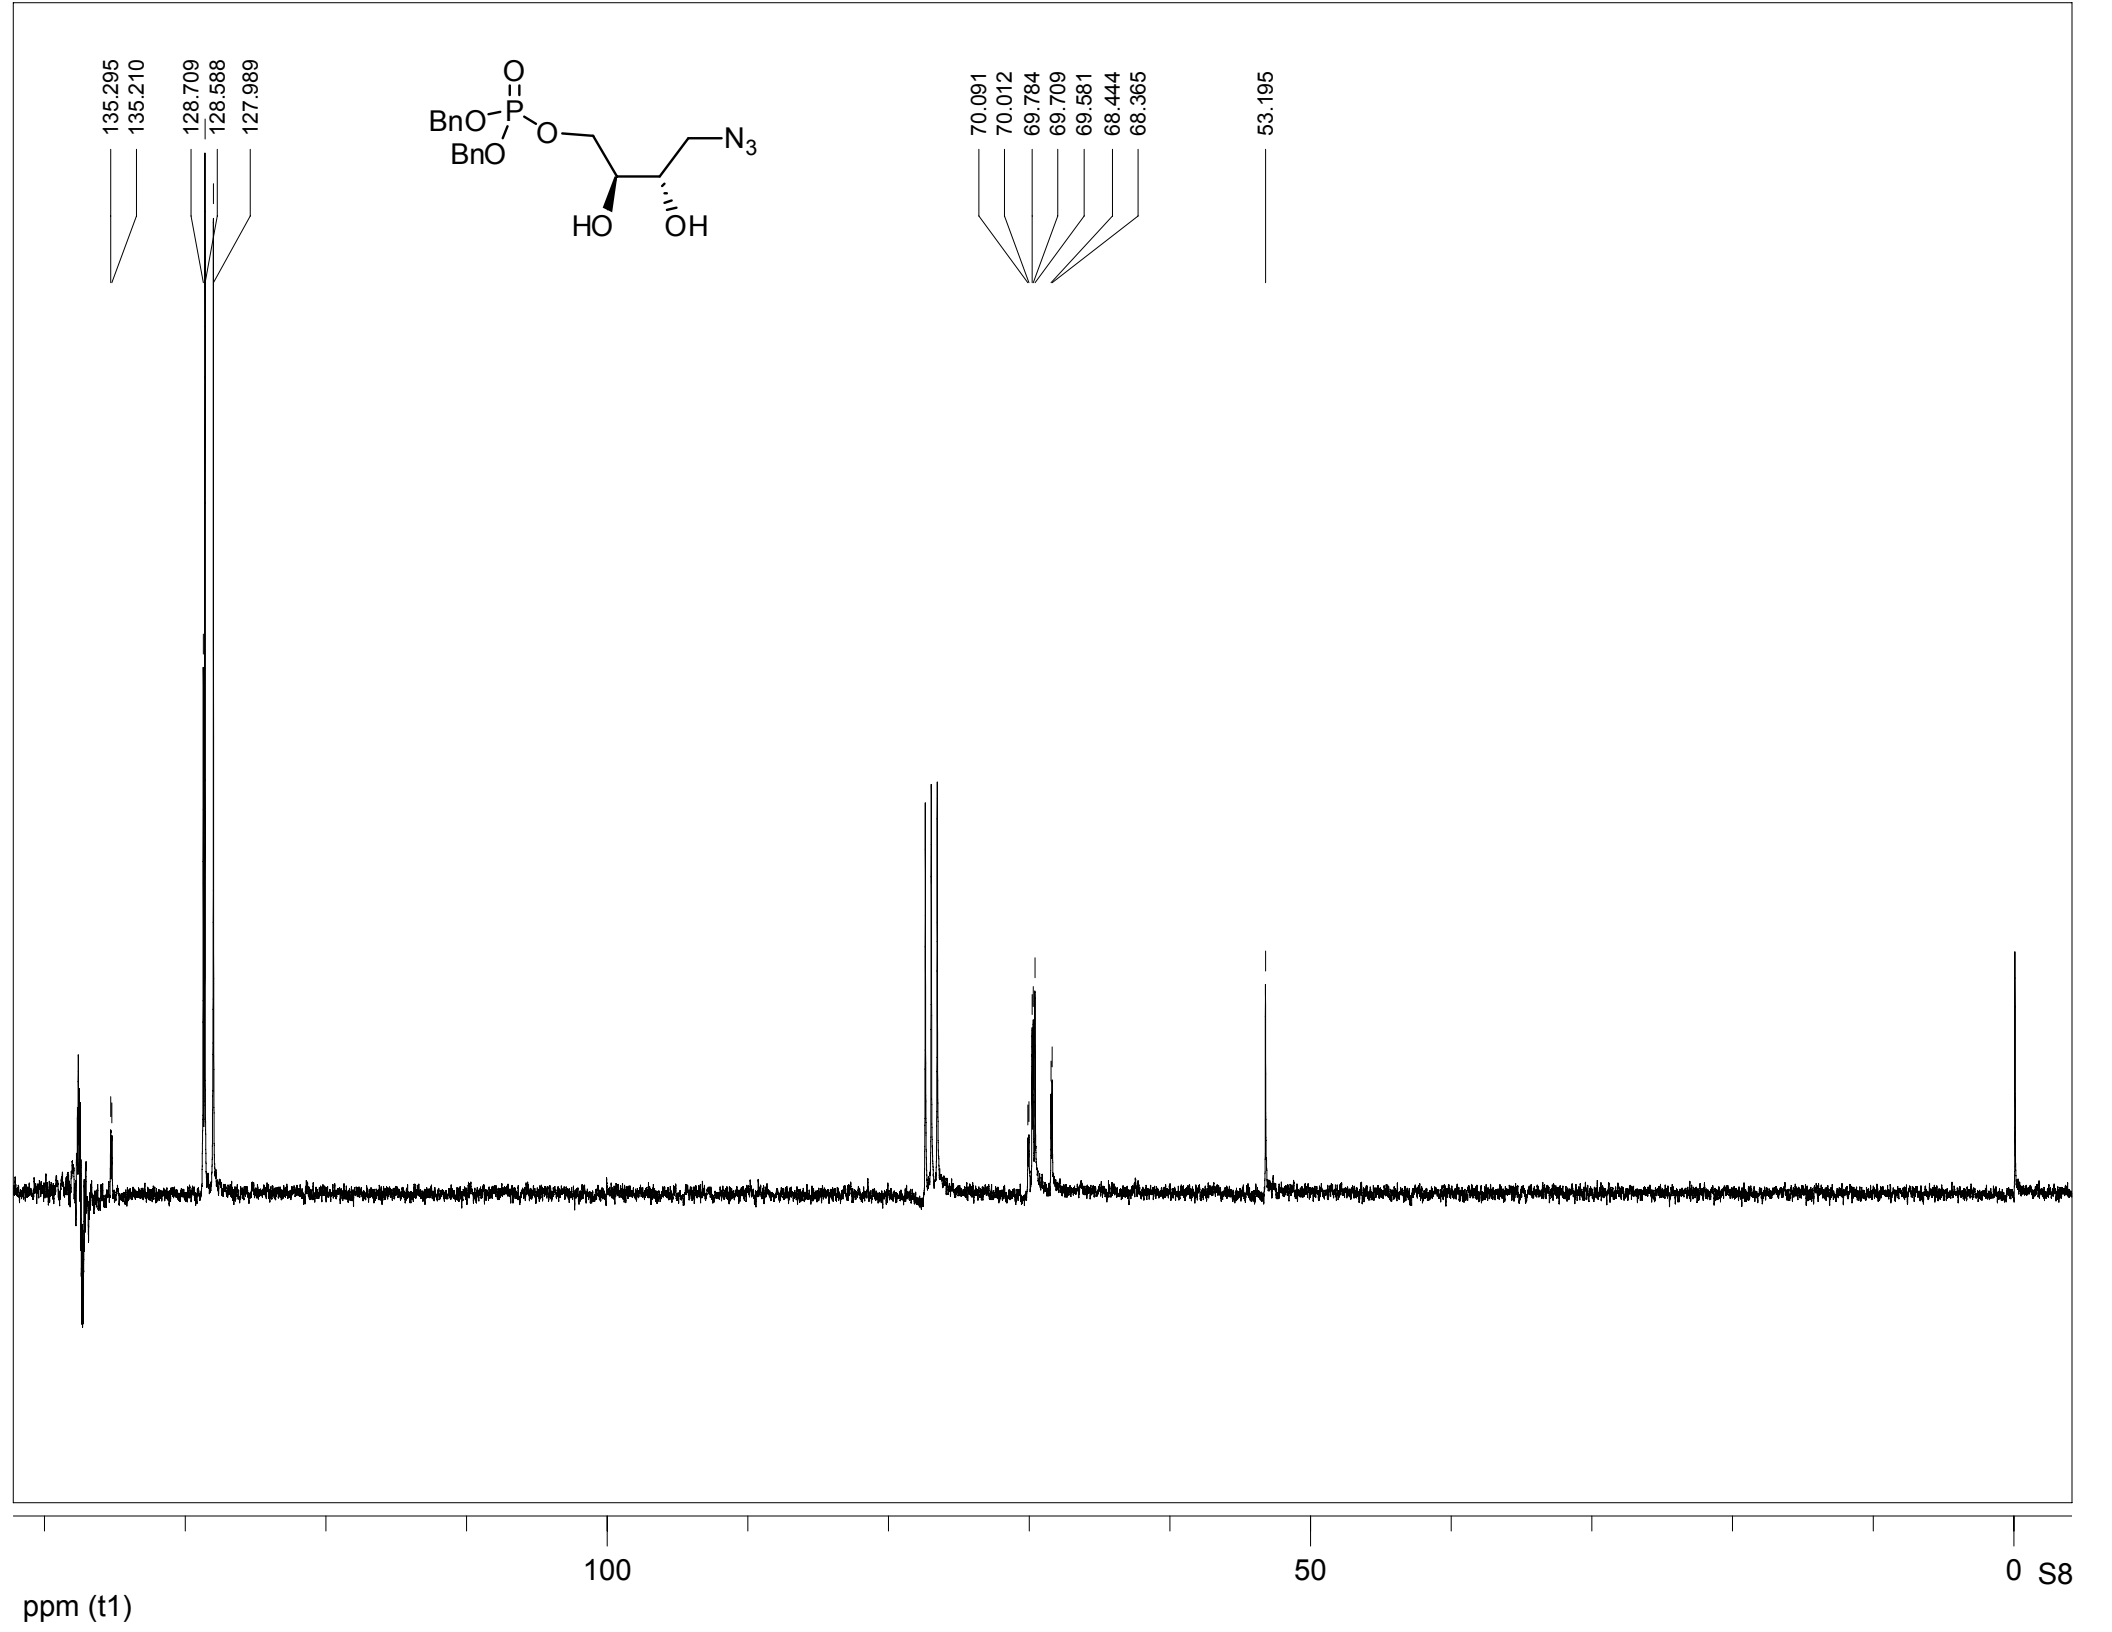

100

50

0 S8

ppm (t1)

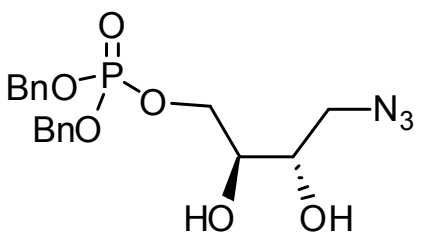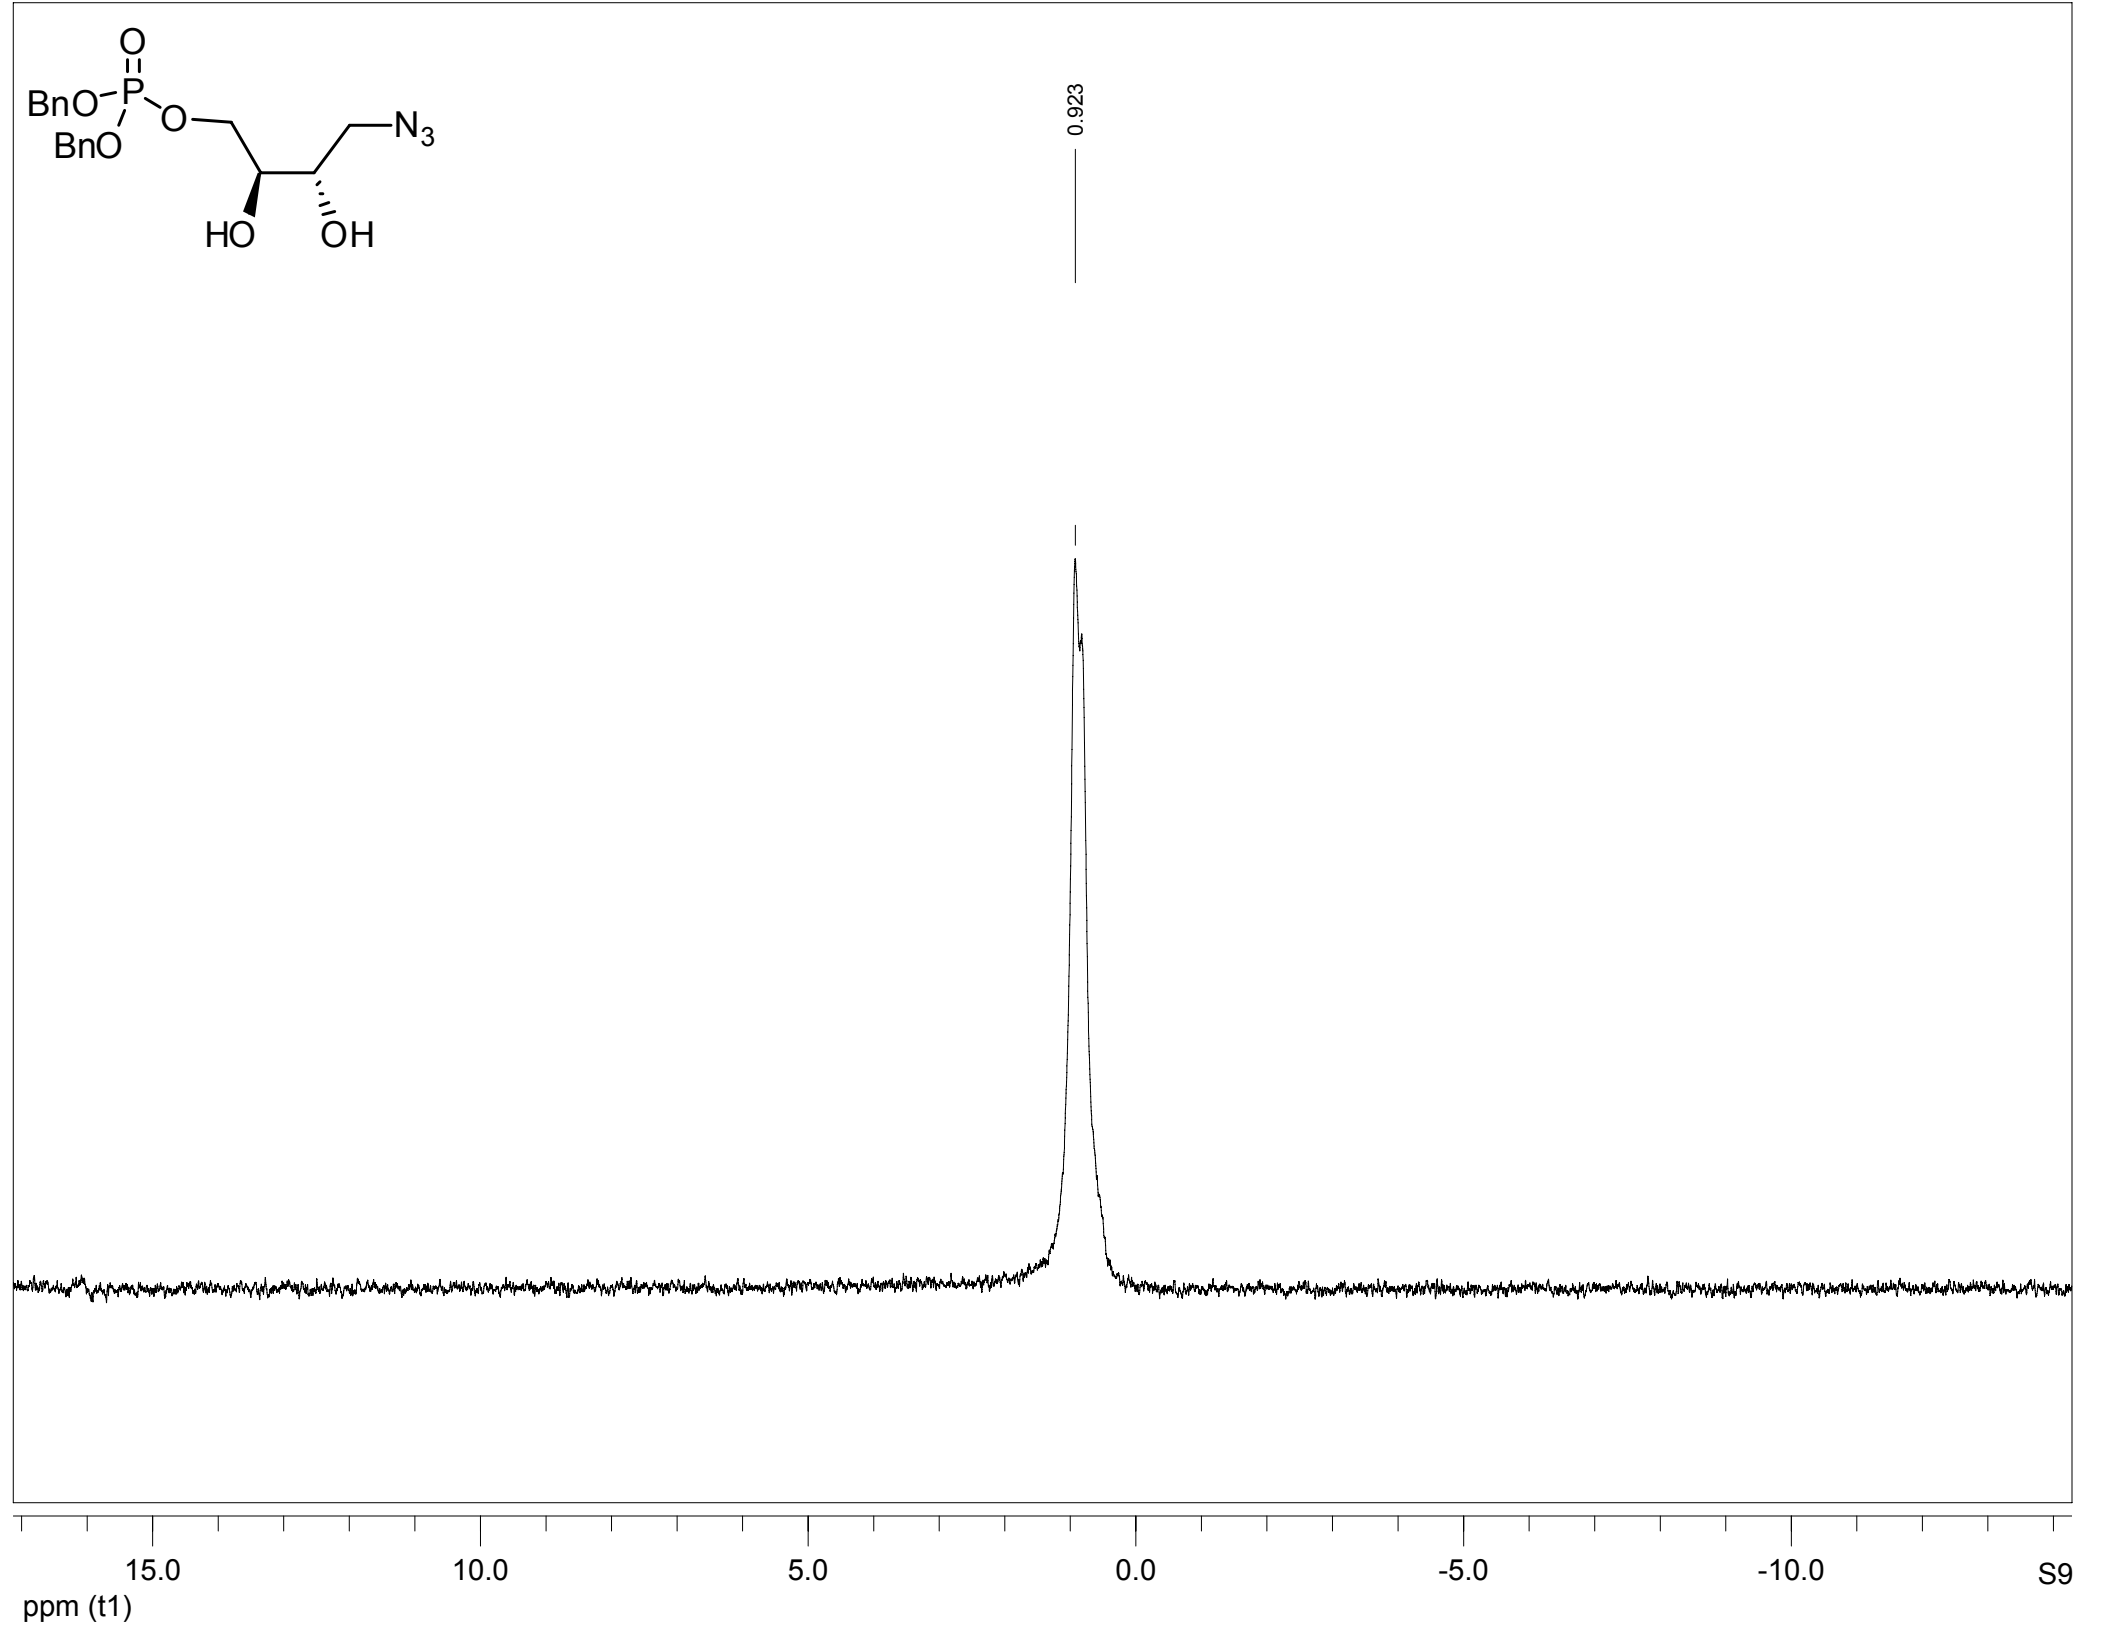

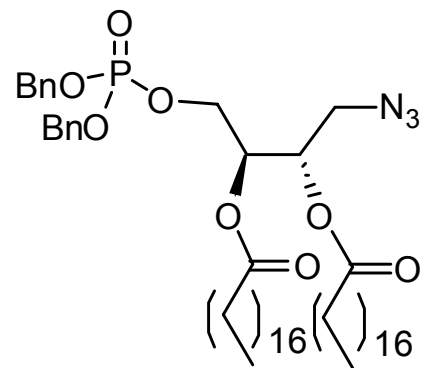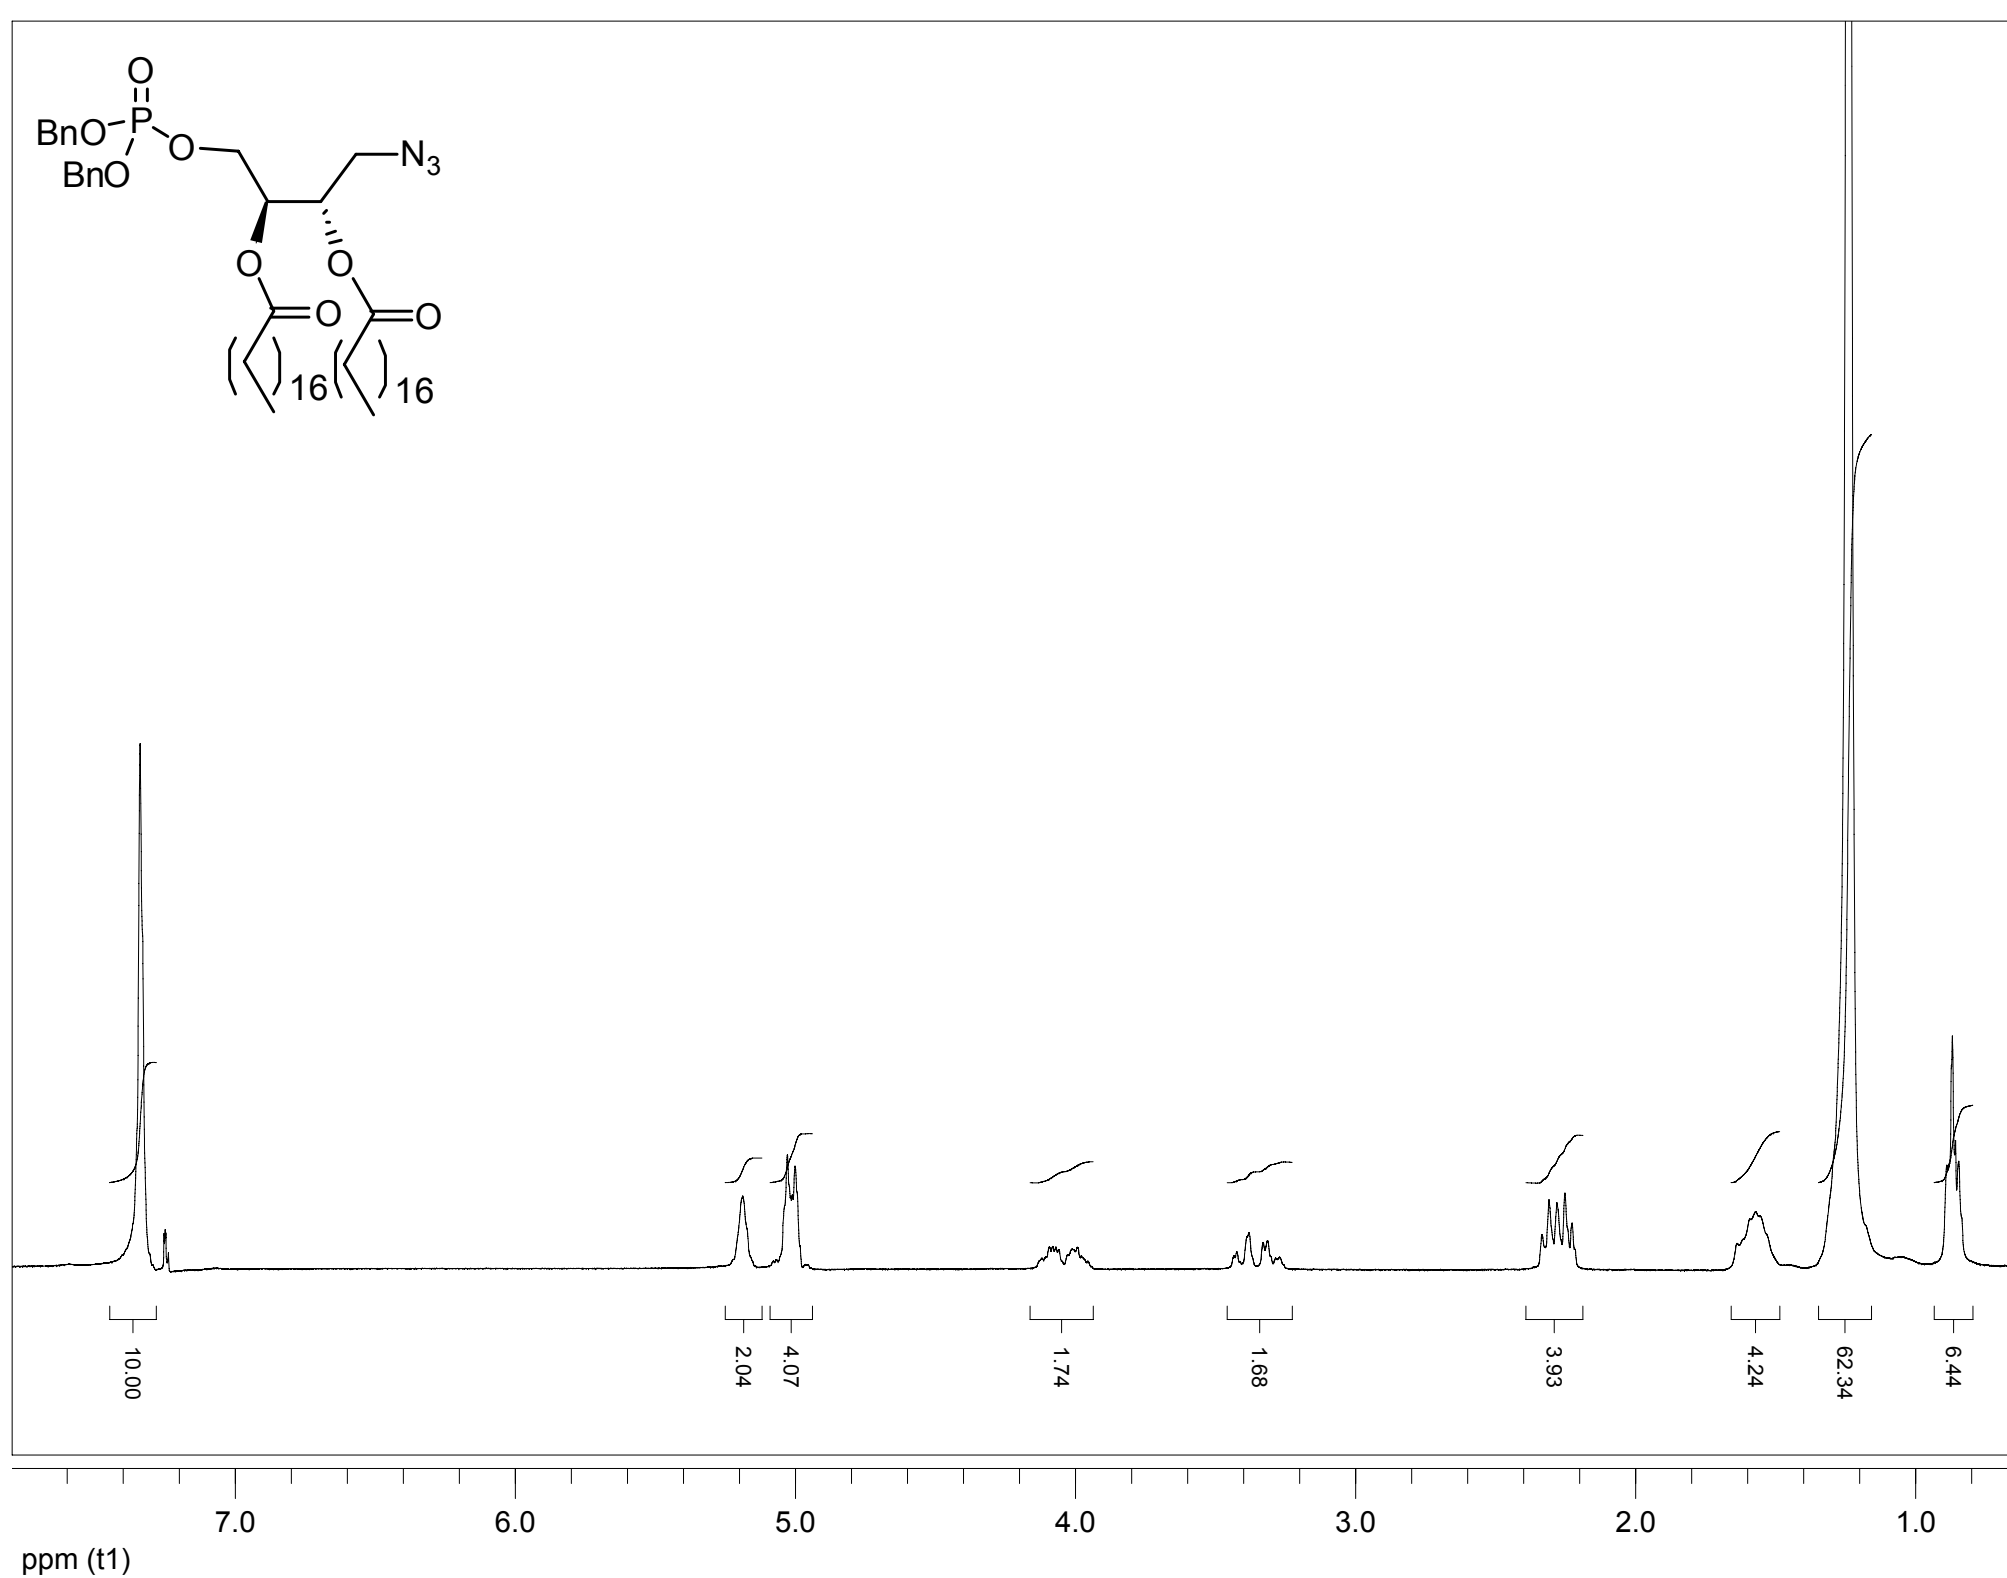

172.667  
172.616

135.594  
135.505  
128.664  
128.631  
128.022  
127.975

69.984  
69.879  
69.733  
69.609  
69.534  
65.084  
65.014

50.556

34.041  
31.937  
29.720  
29.678  
29.491  
29.380  
29.286  
29.123  
24.810  
24.782  
22.706  
14.140

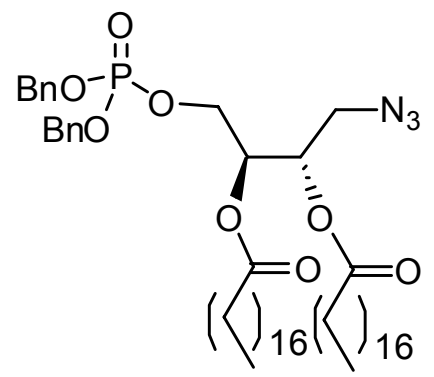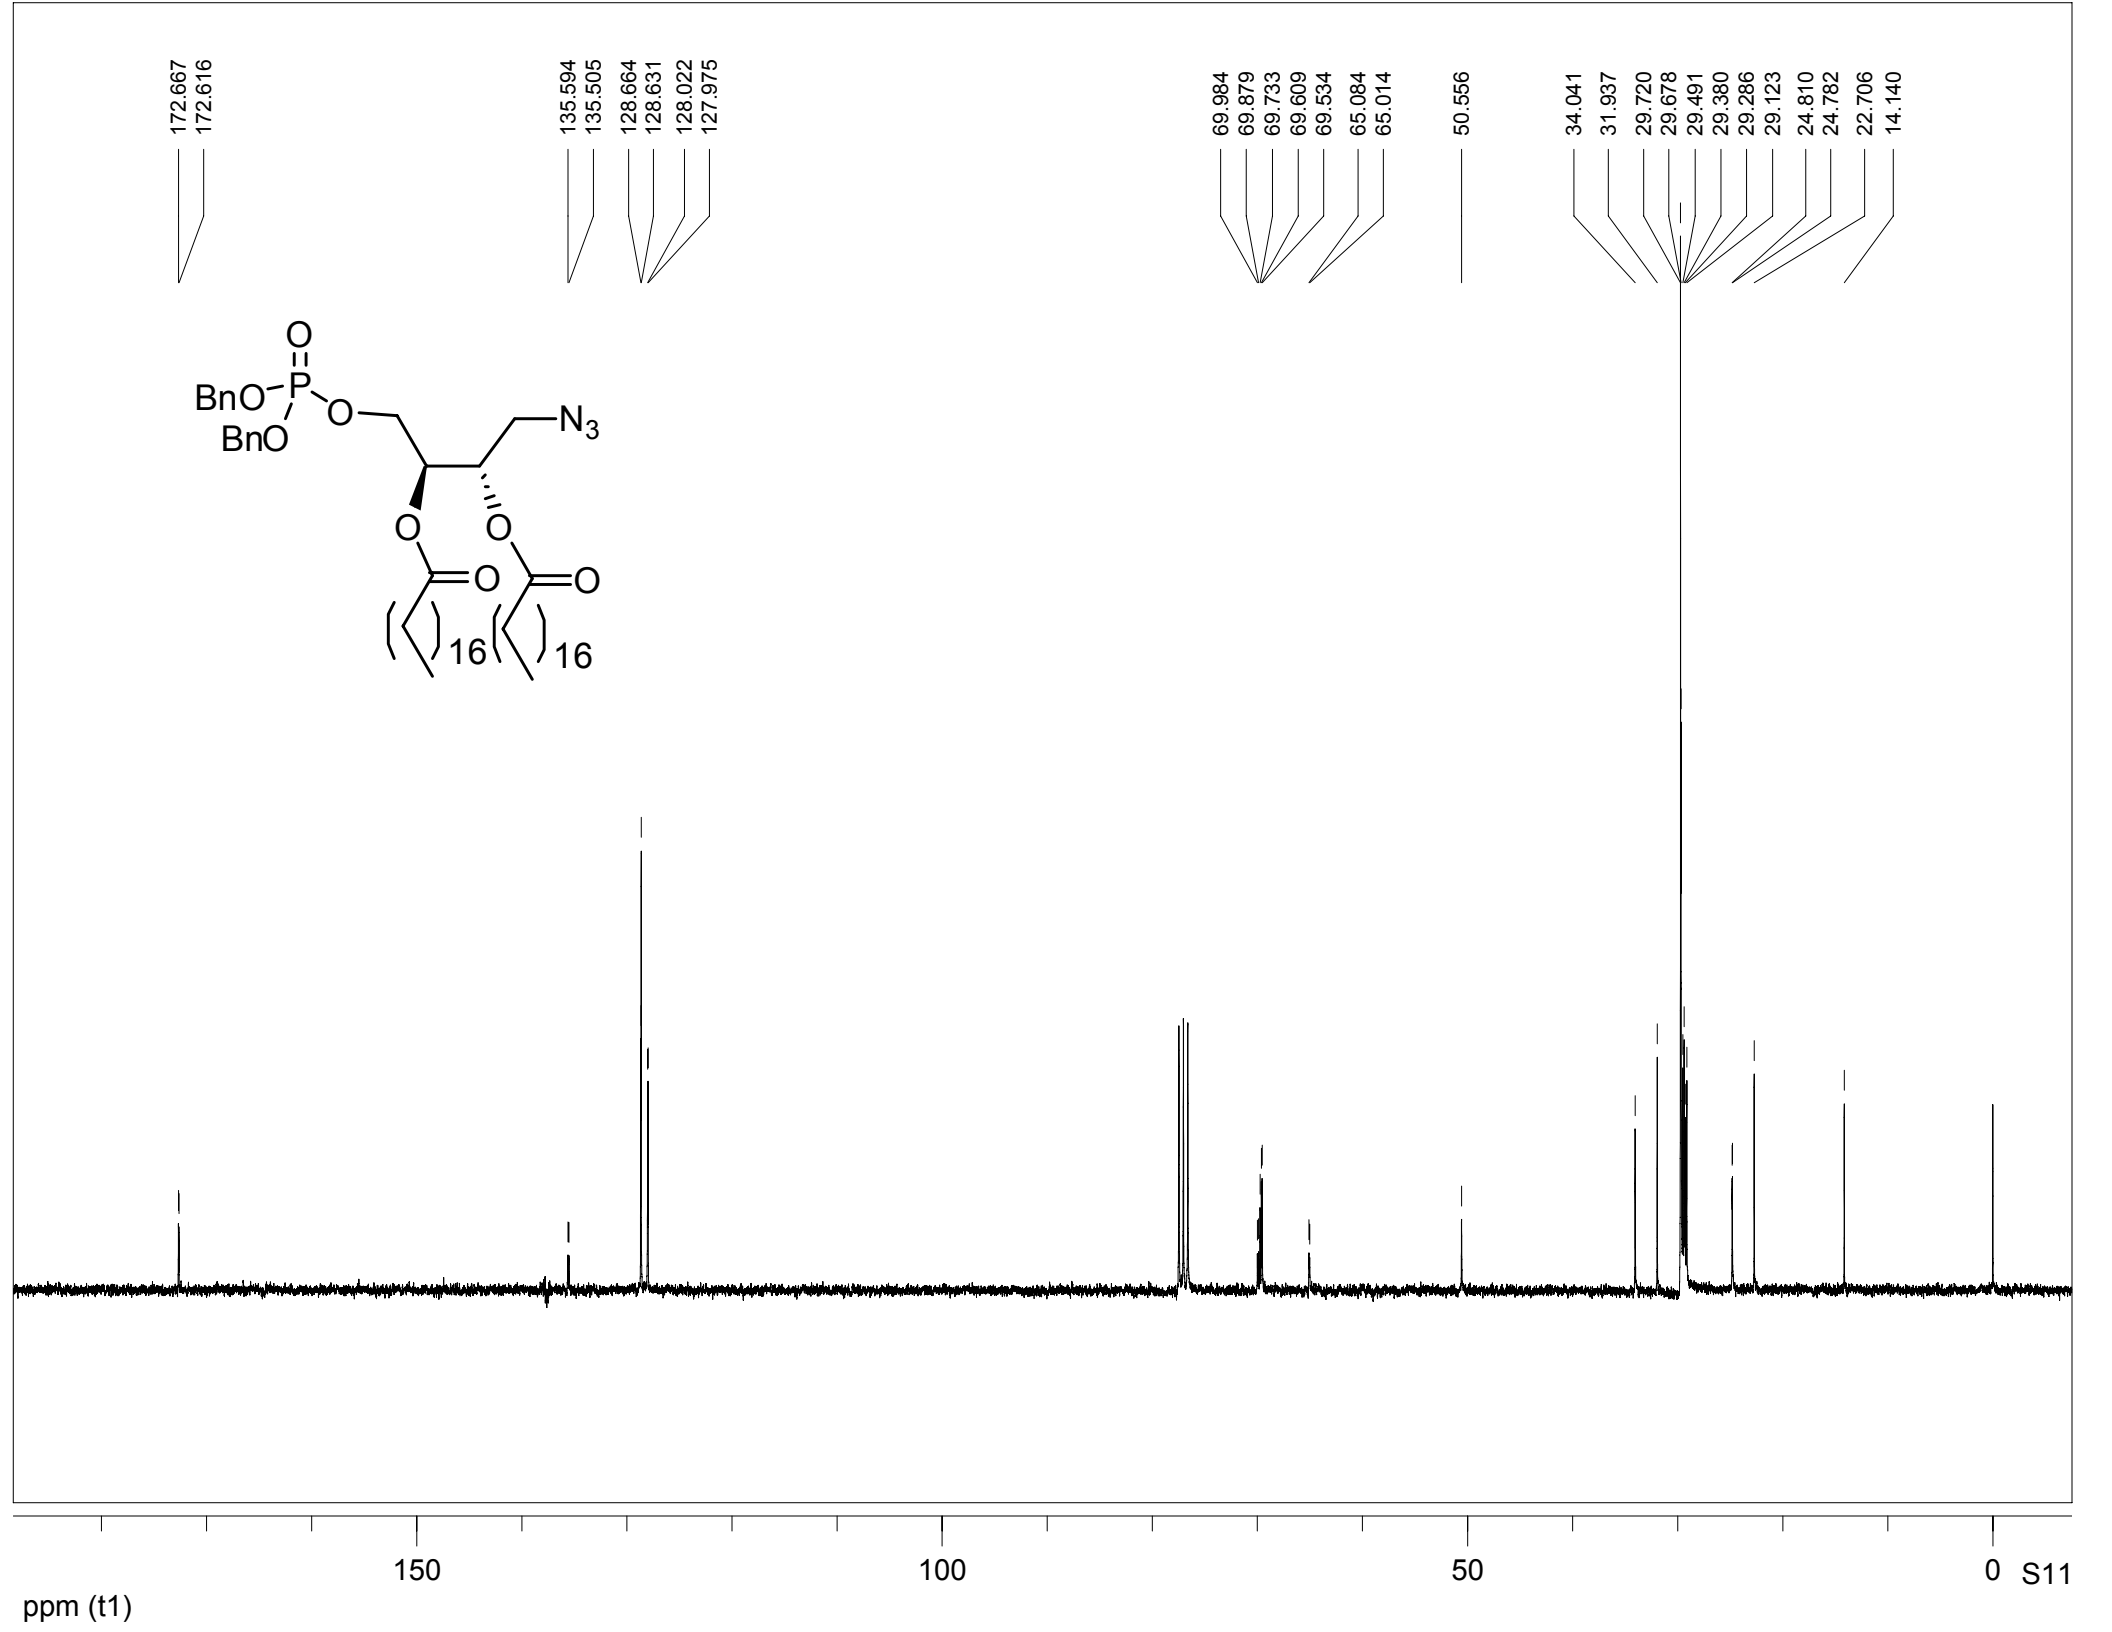

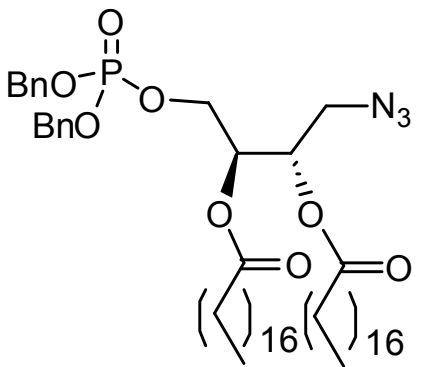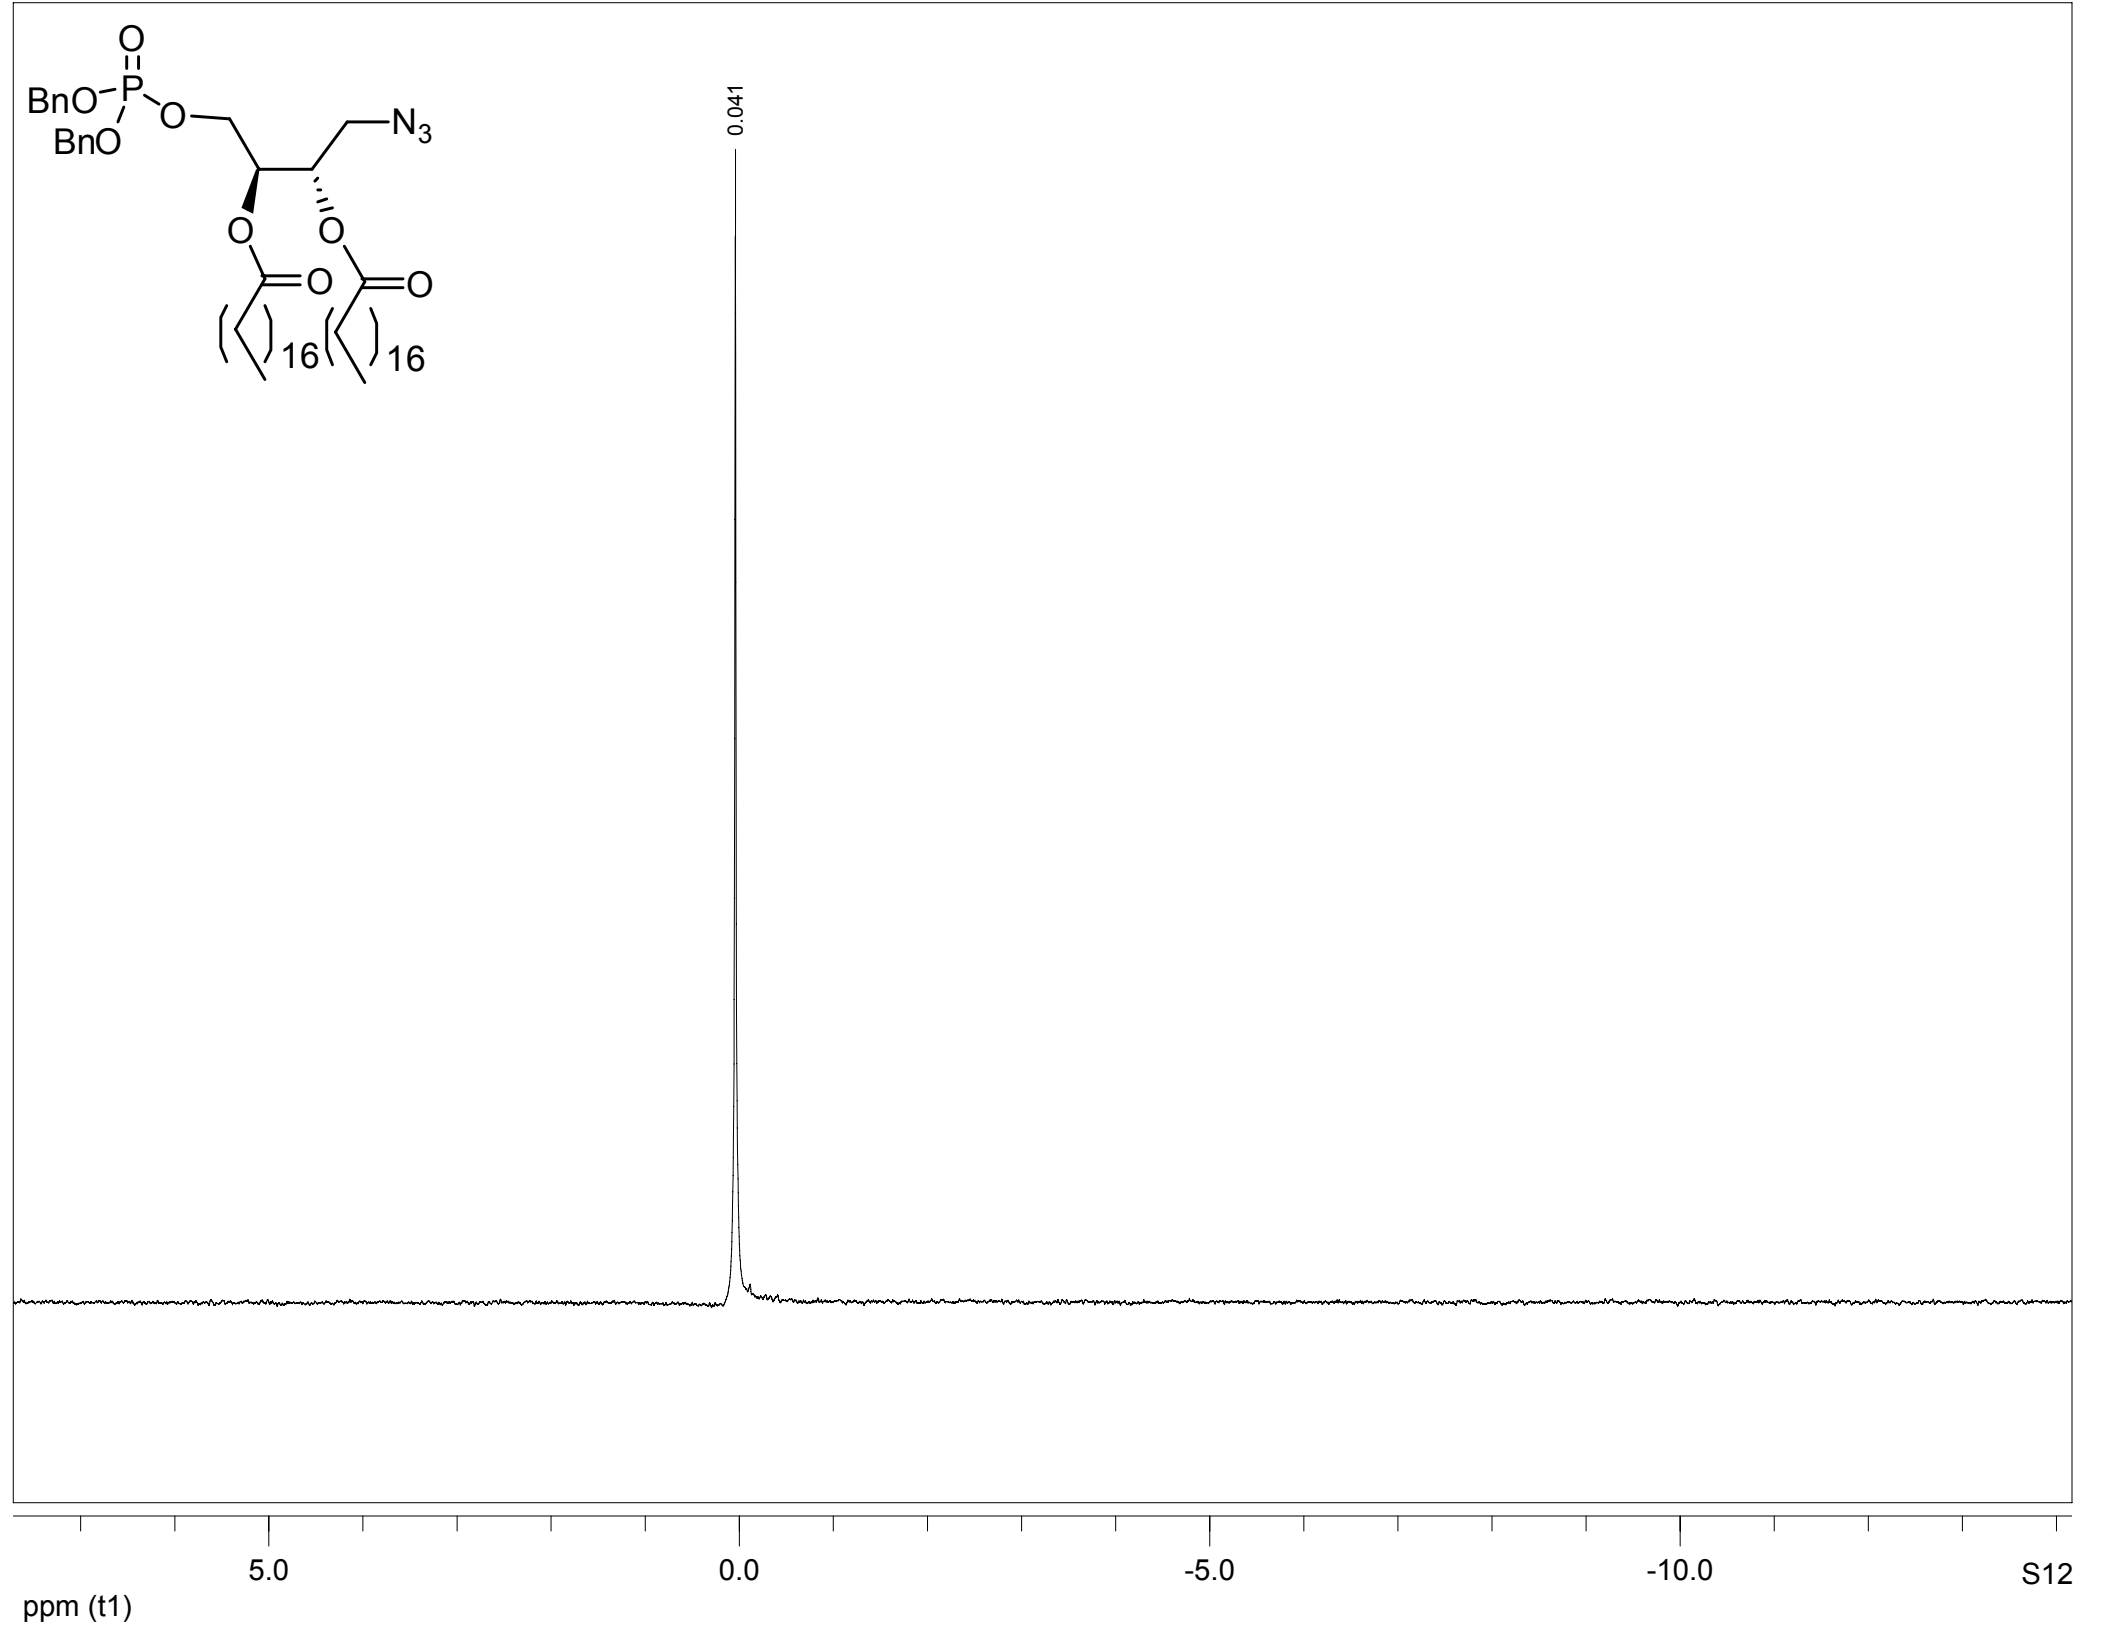



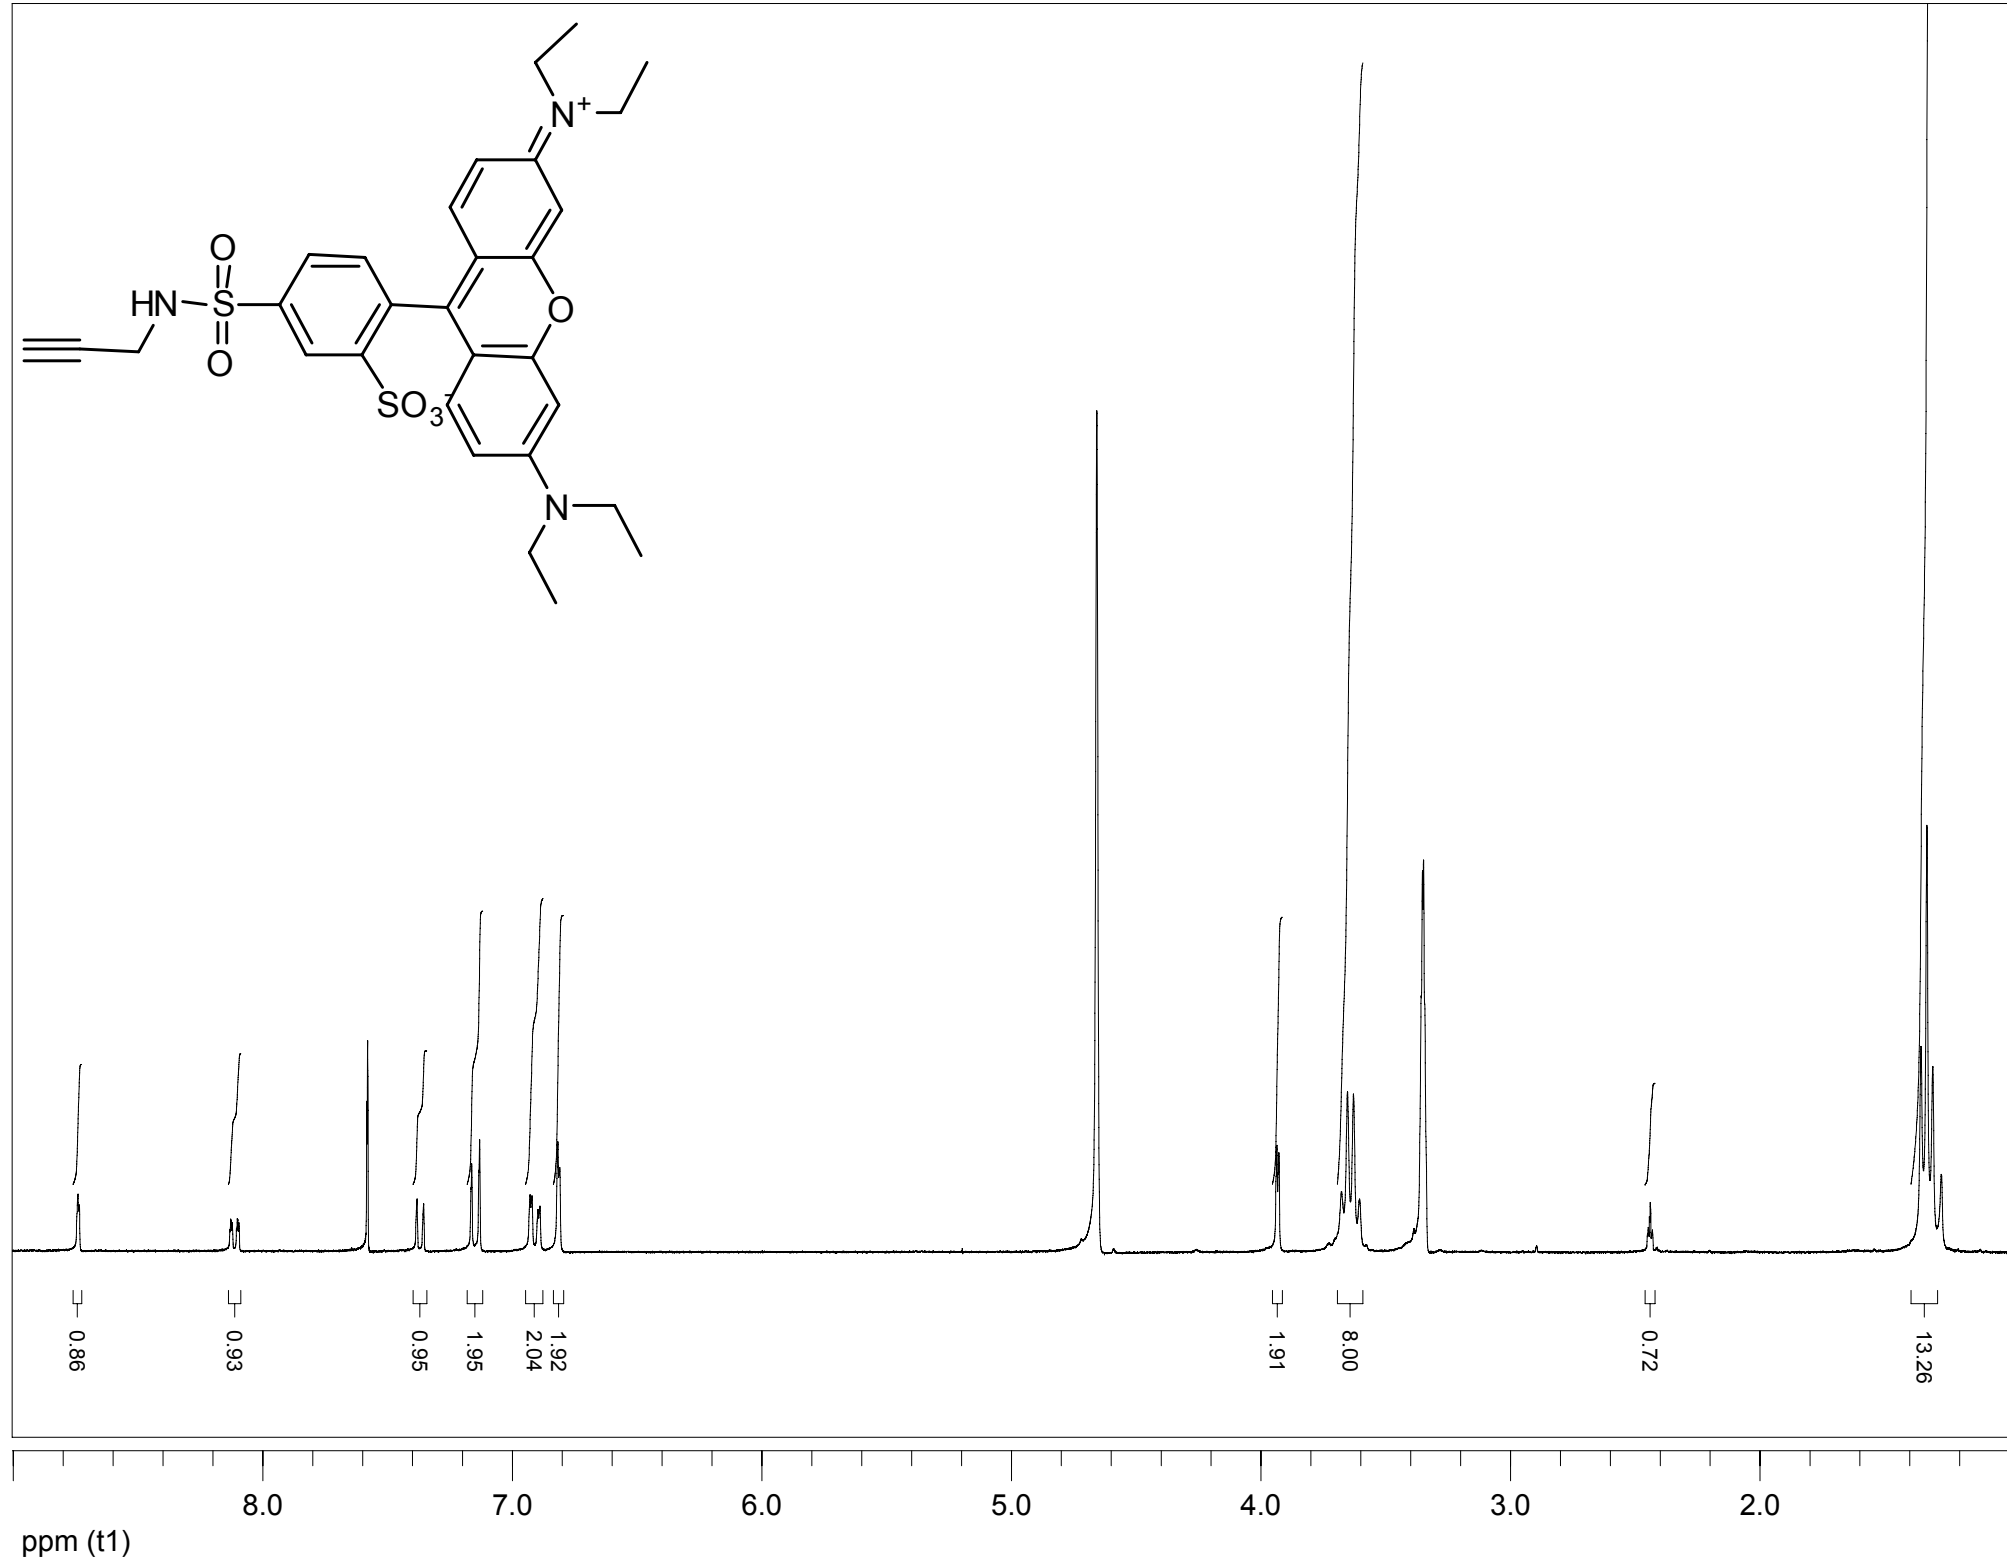

158.340  
157.436  
156.043  
  
146.623  
142.656  
  
134.402  
133.034  
130.733  
128.592  
127.649  
  
114.453  
114.094  
  
96.173  
  
78.575  
73.477  
  
46.216  
  
32.805  
29.975  
  
12.664  
  
0.000

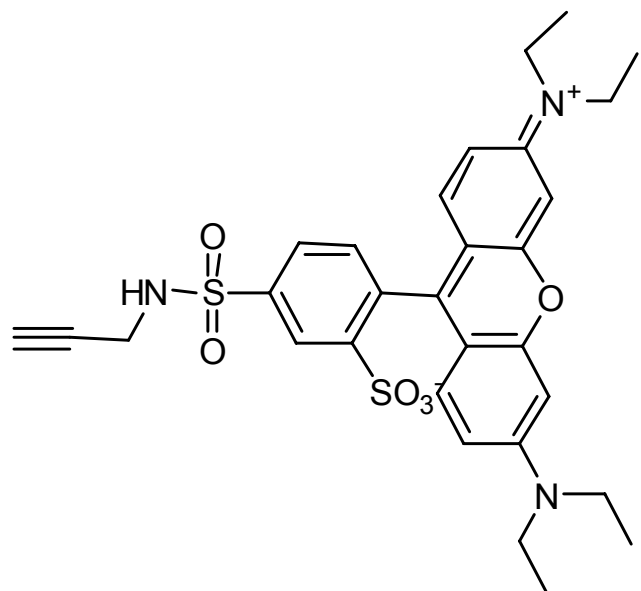

ppm (t1)

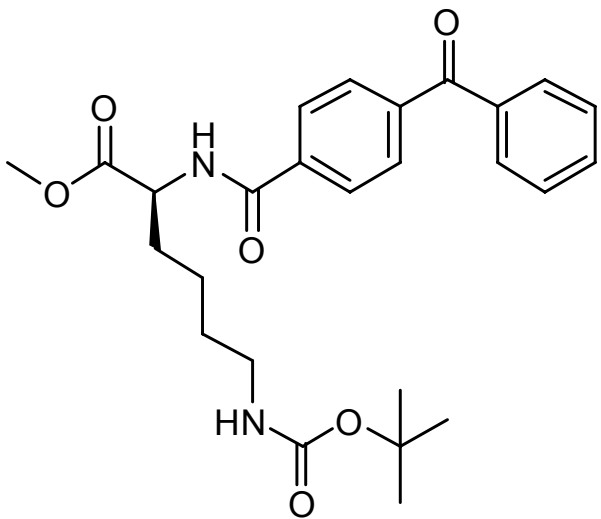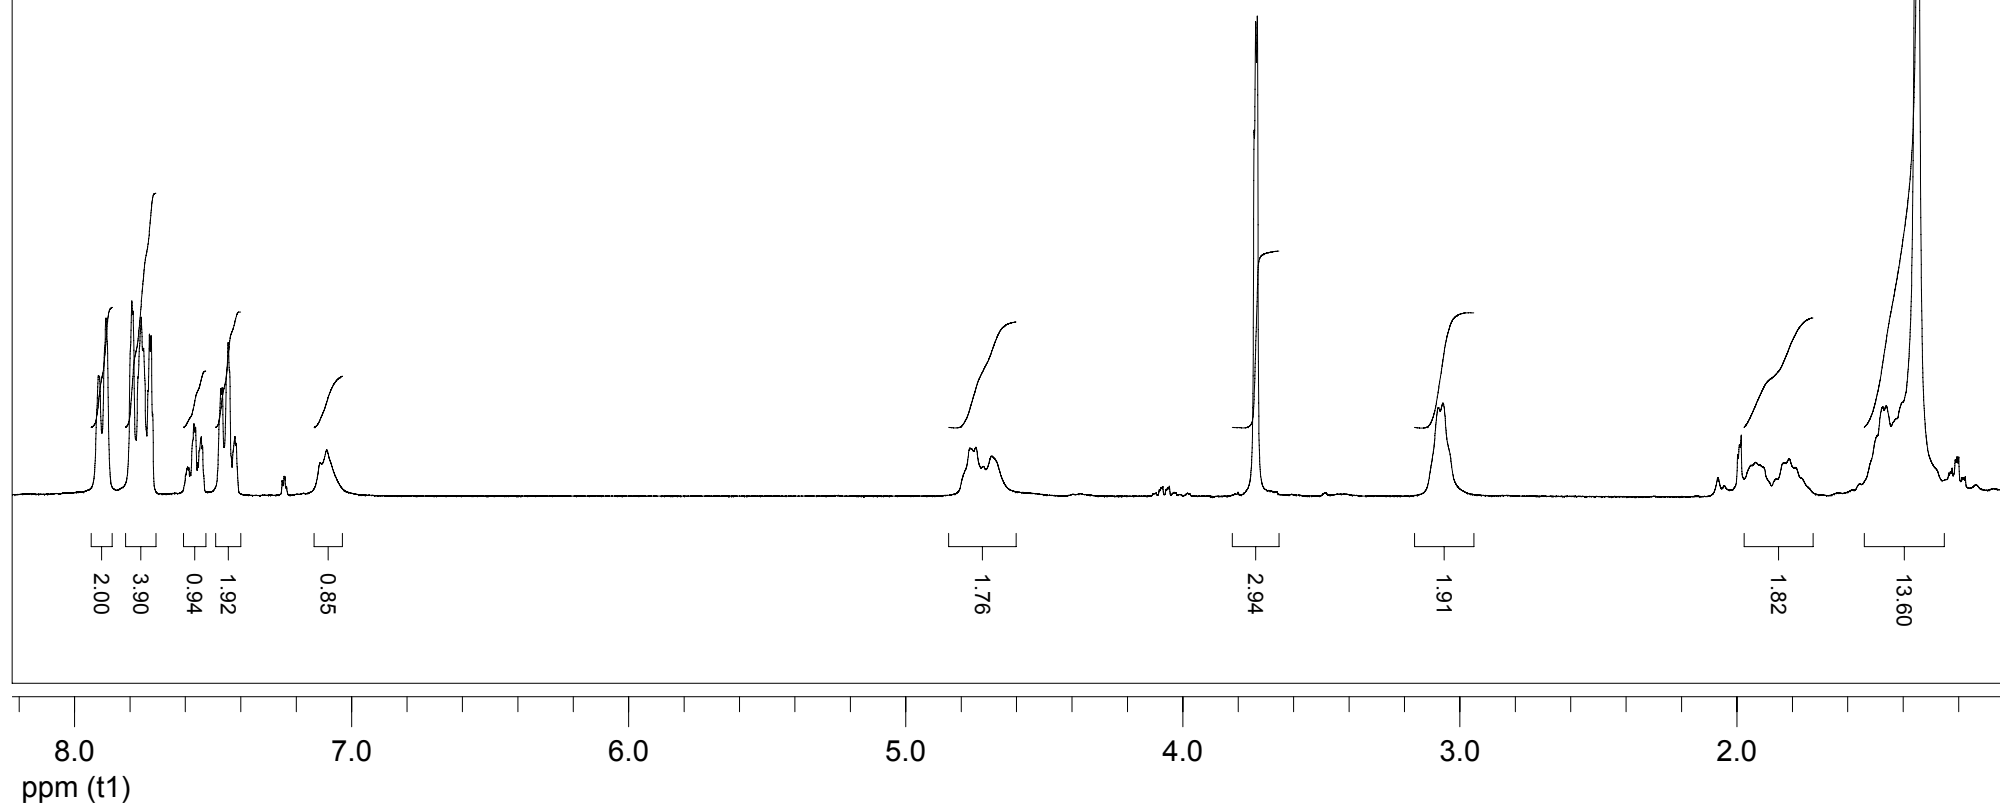

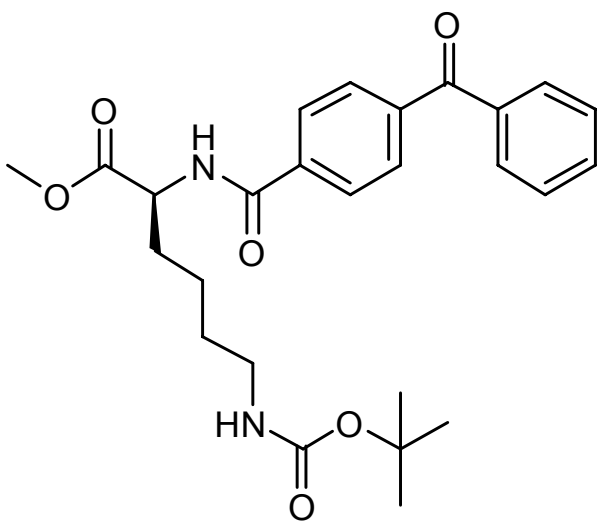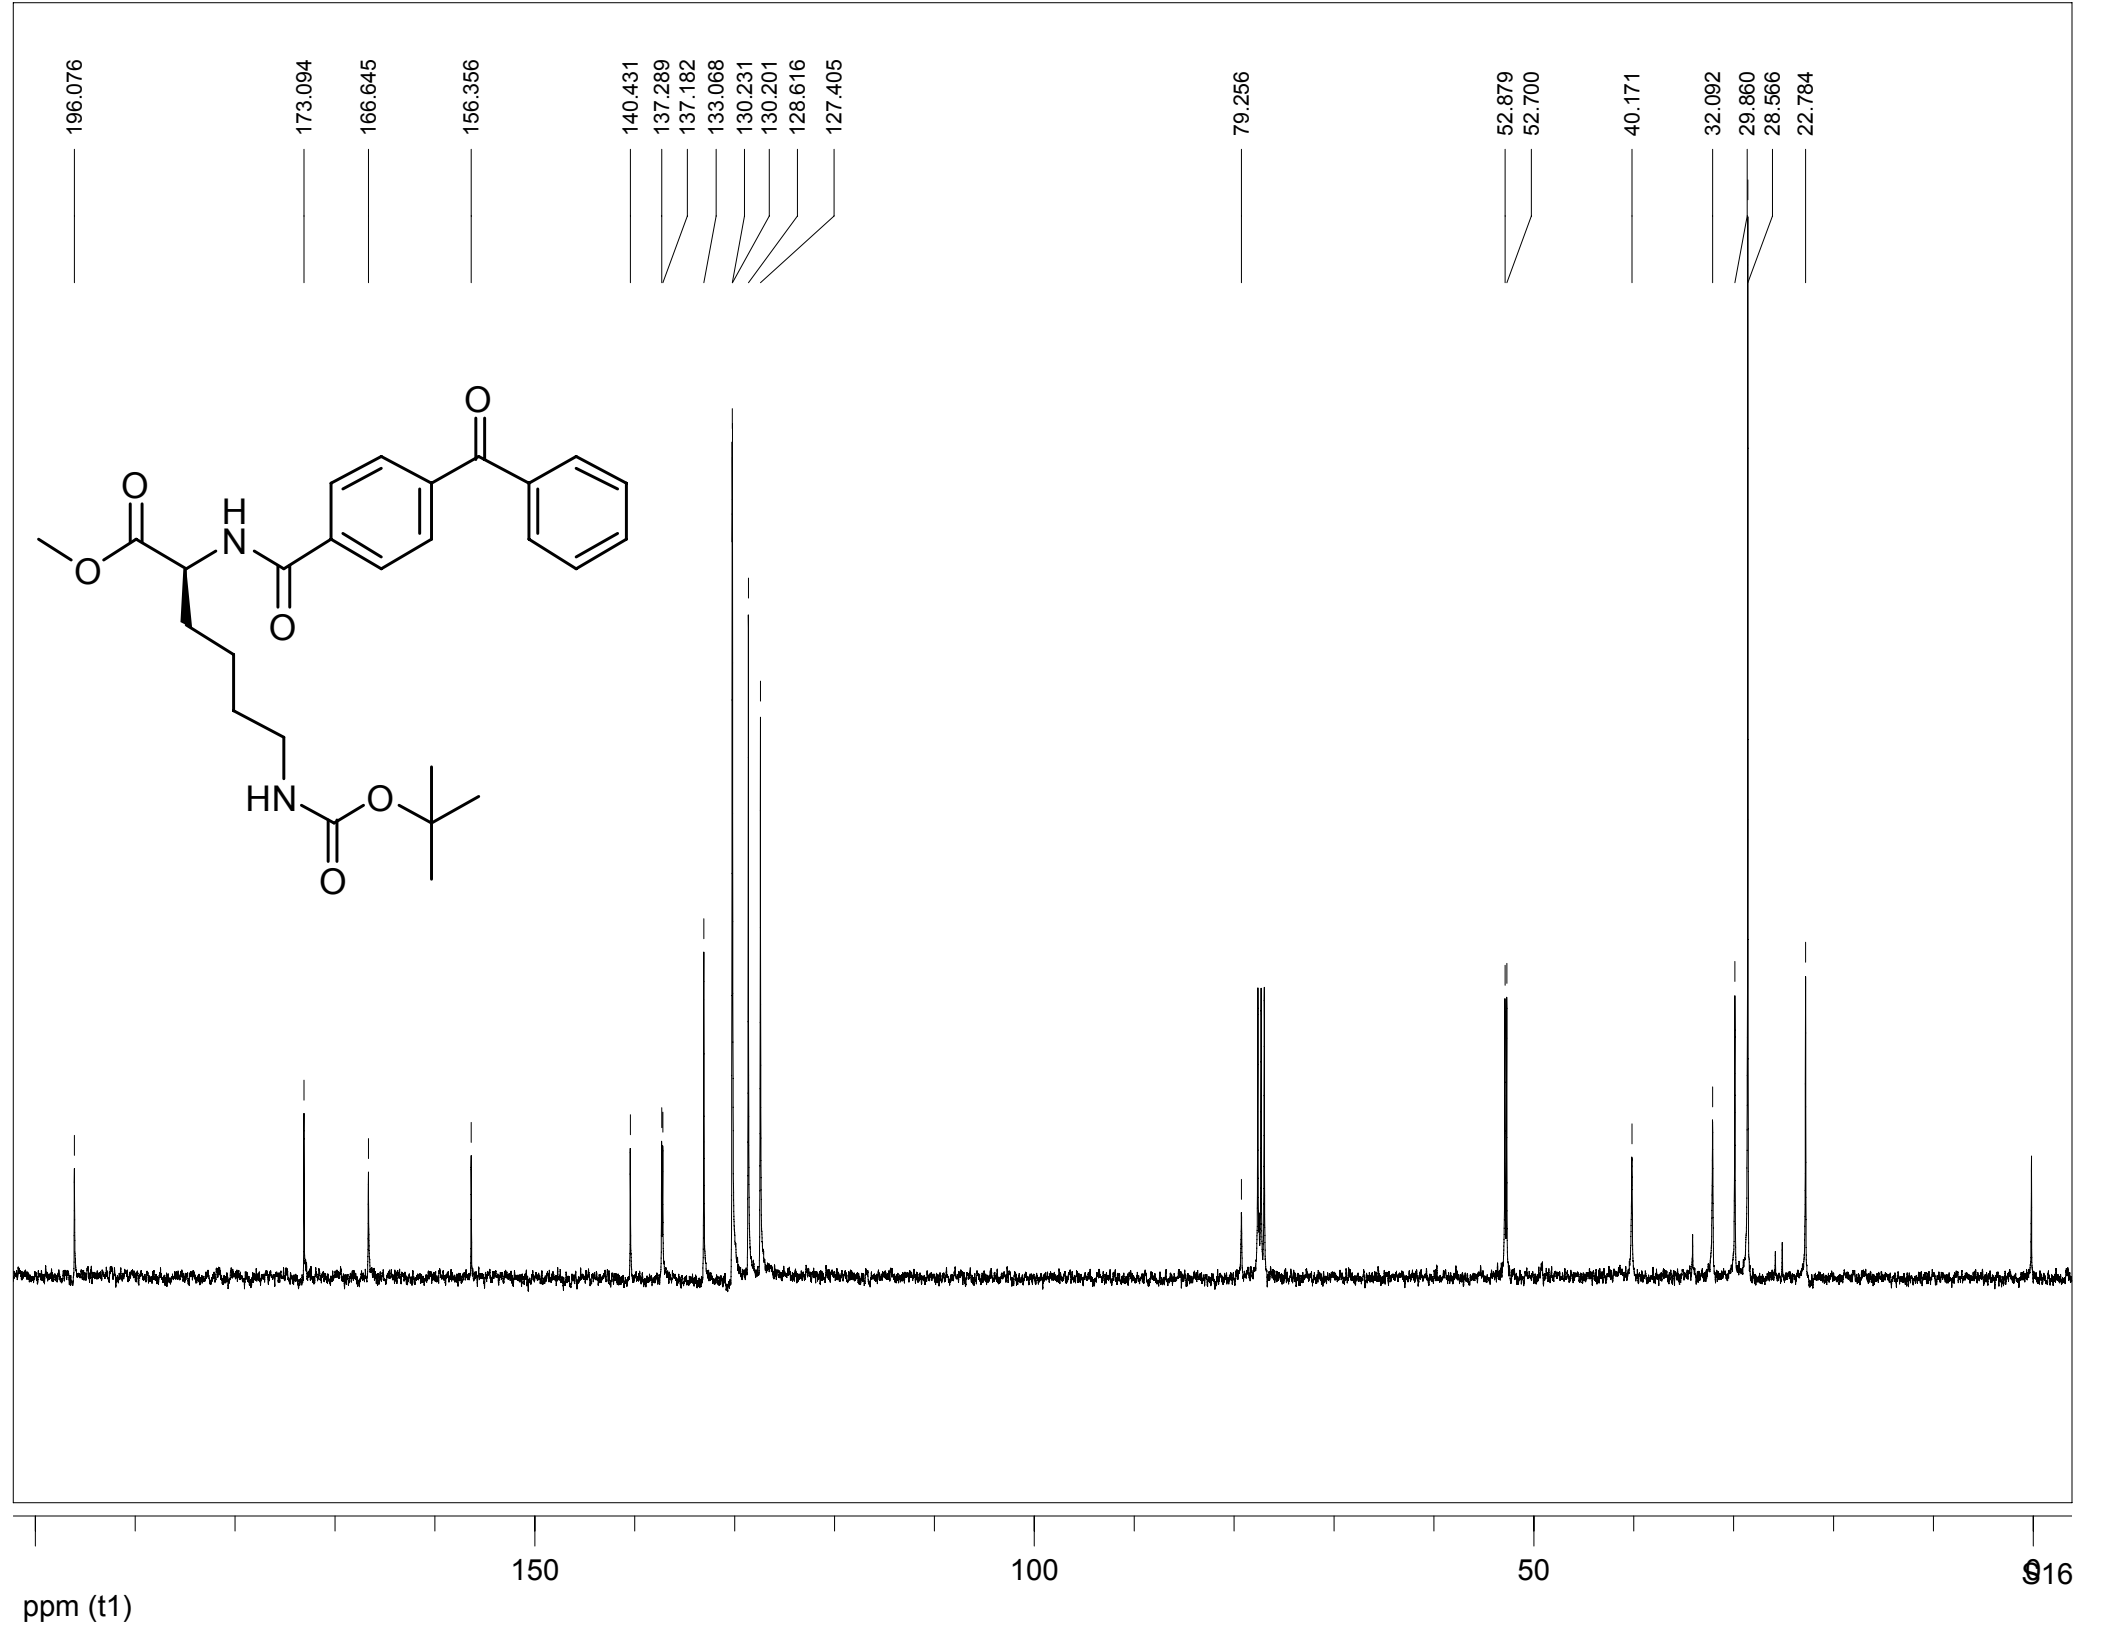

ppm (t1)

916

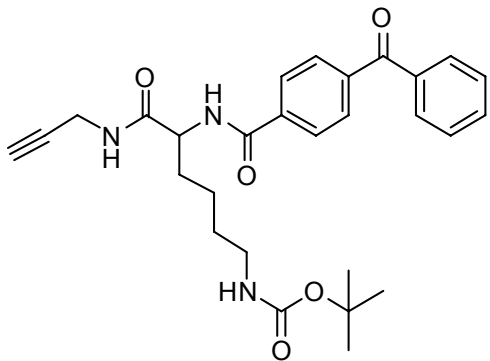

**Proton NMR**

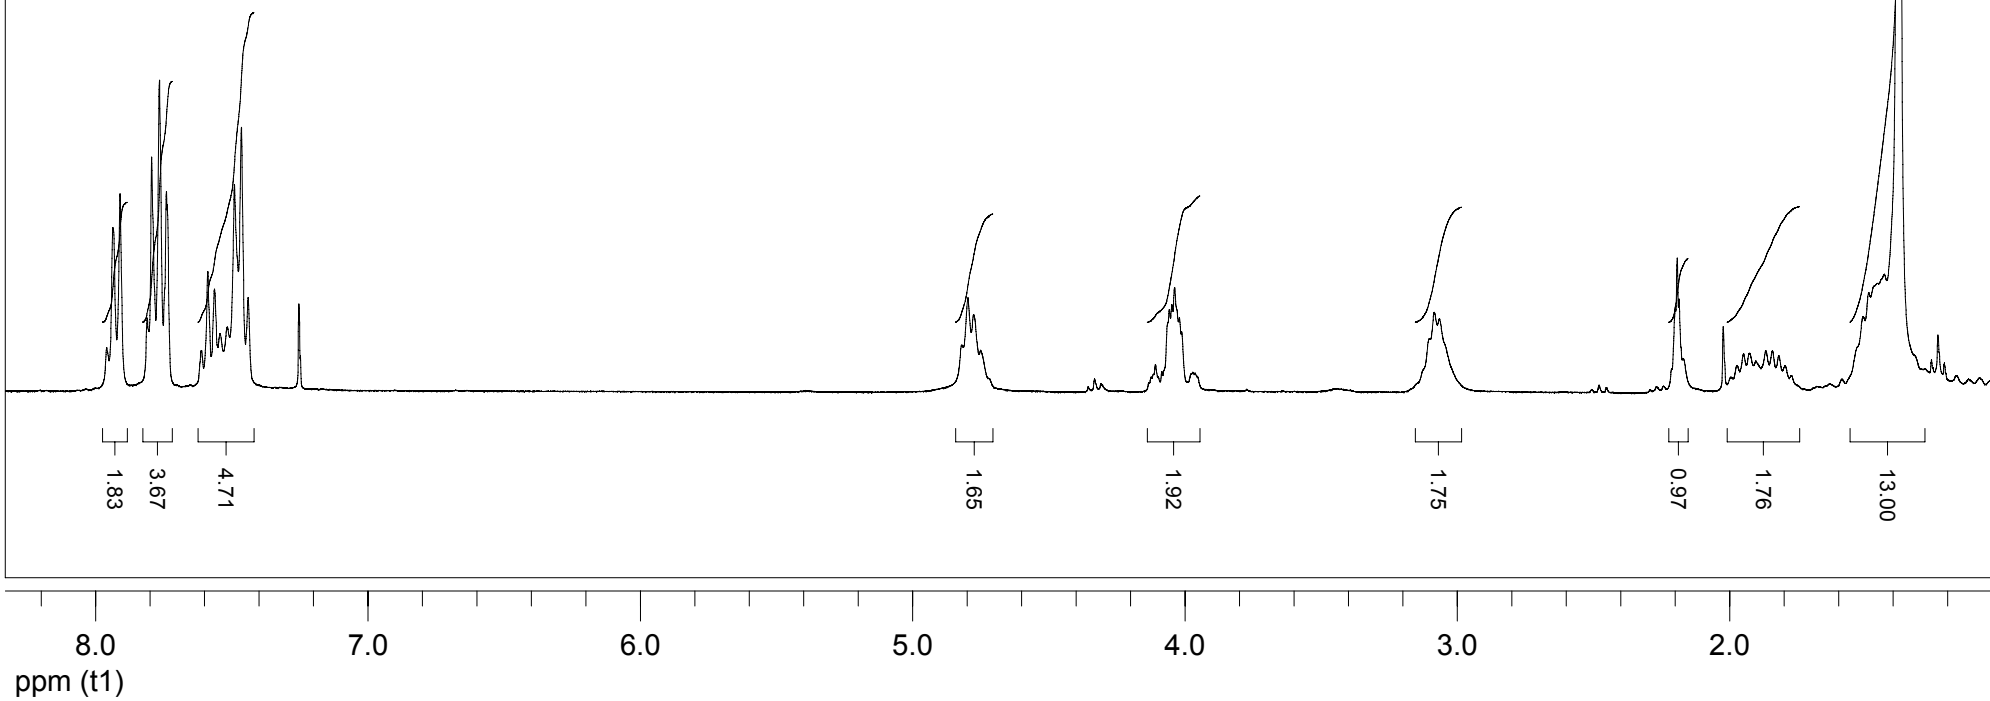

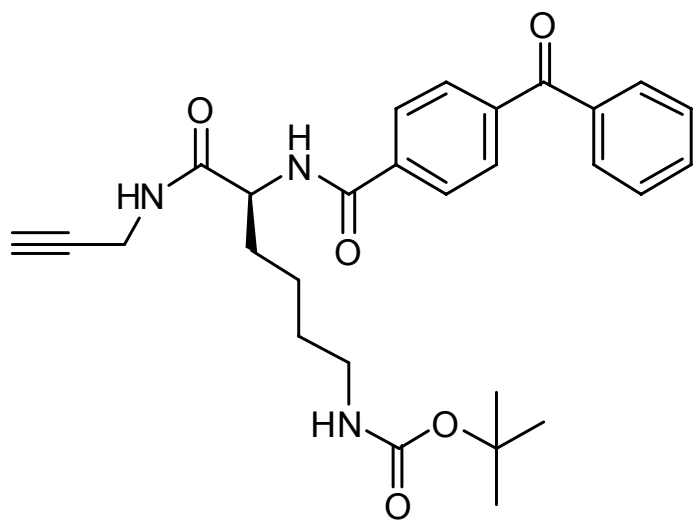

195.964  
171.828  
166.829  
156.263  
140.320  
136.967  
136.857  
132.983  
130.120  
130.047  
128.507  
127.395

79.342  
79.180  
71.725  
53.535  
40.123  
32.301  
29.675  
29.237  
28.480  
22.796

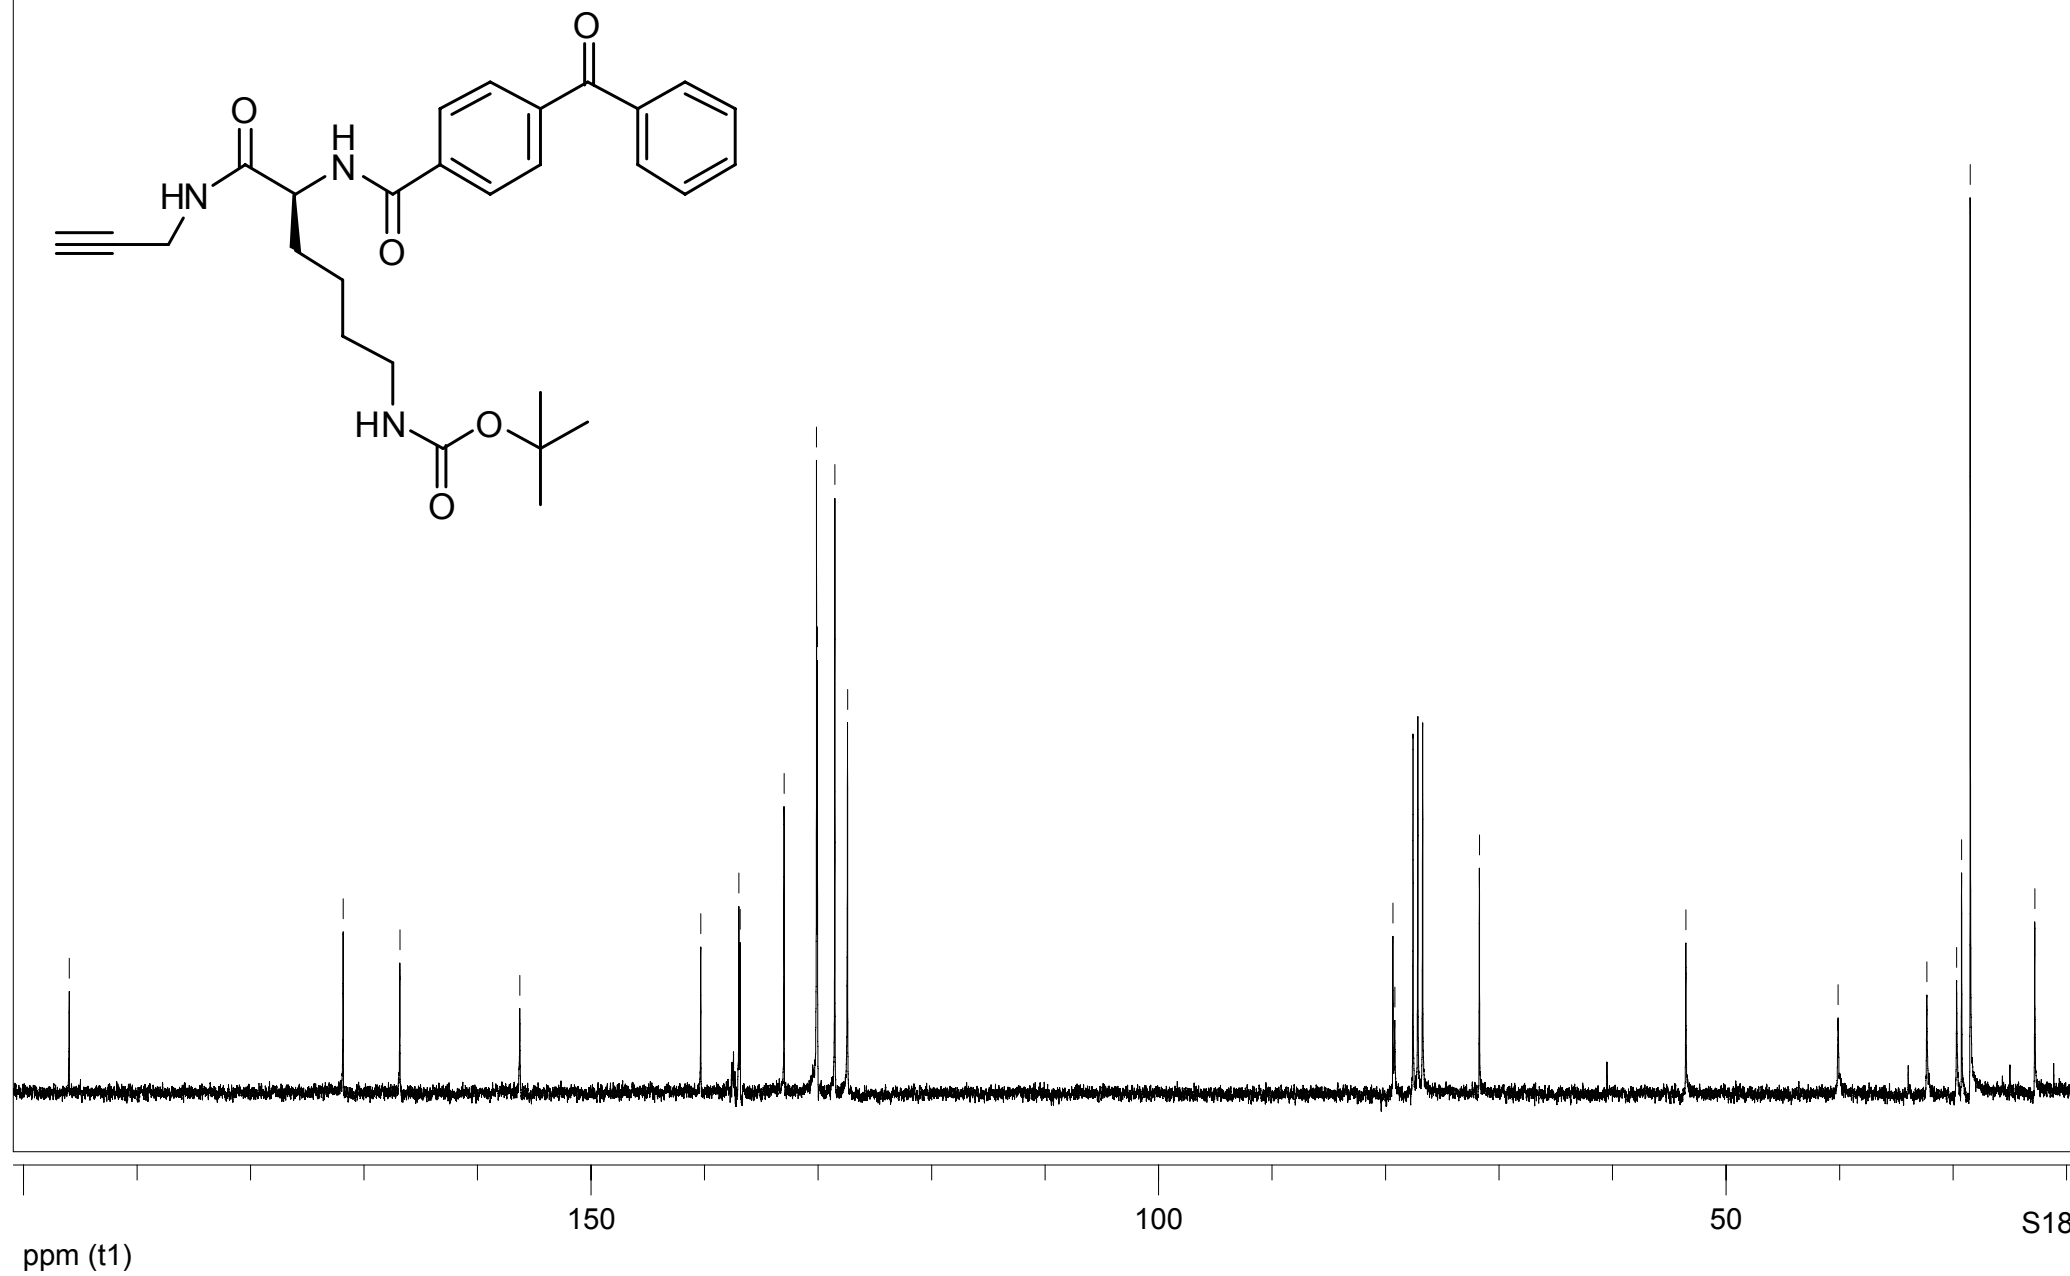

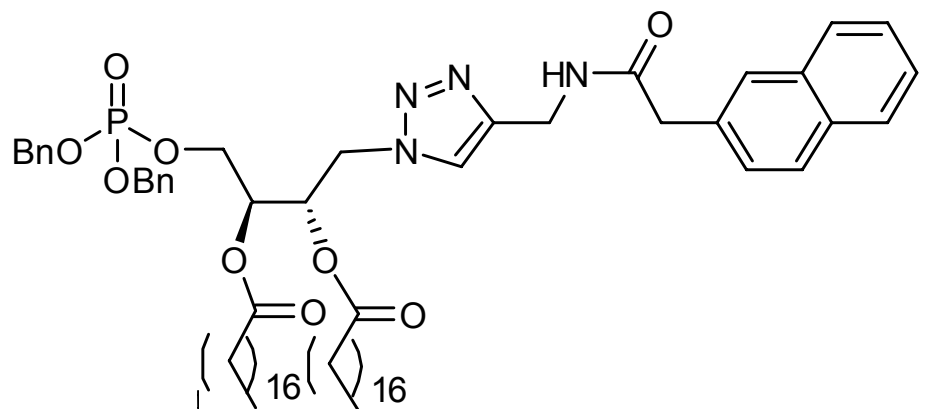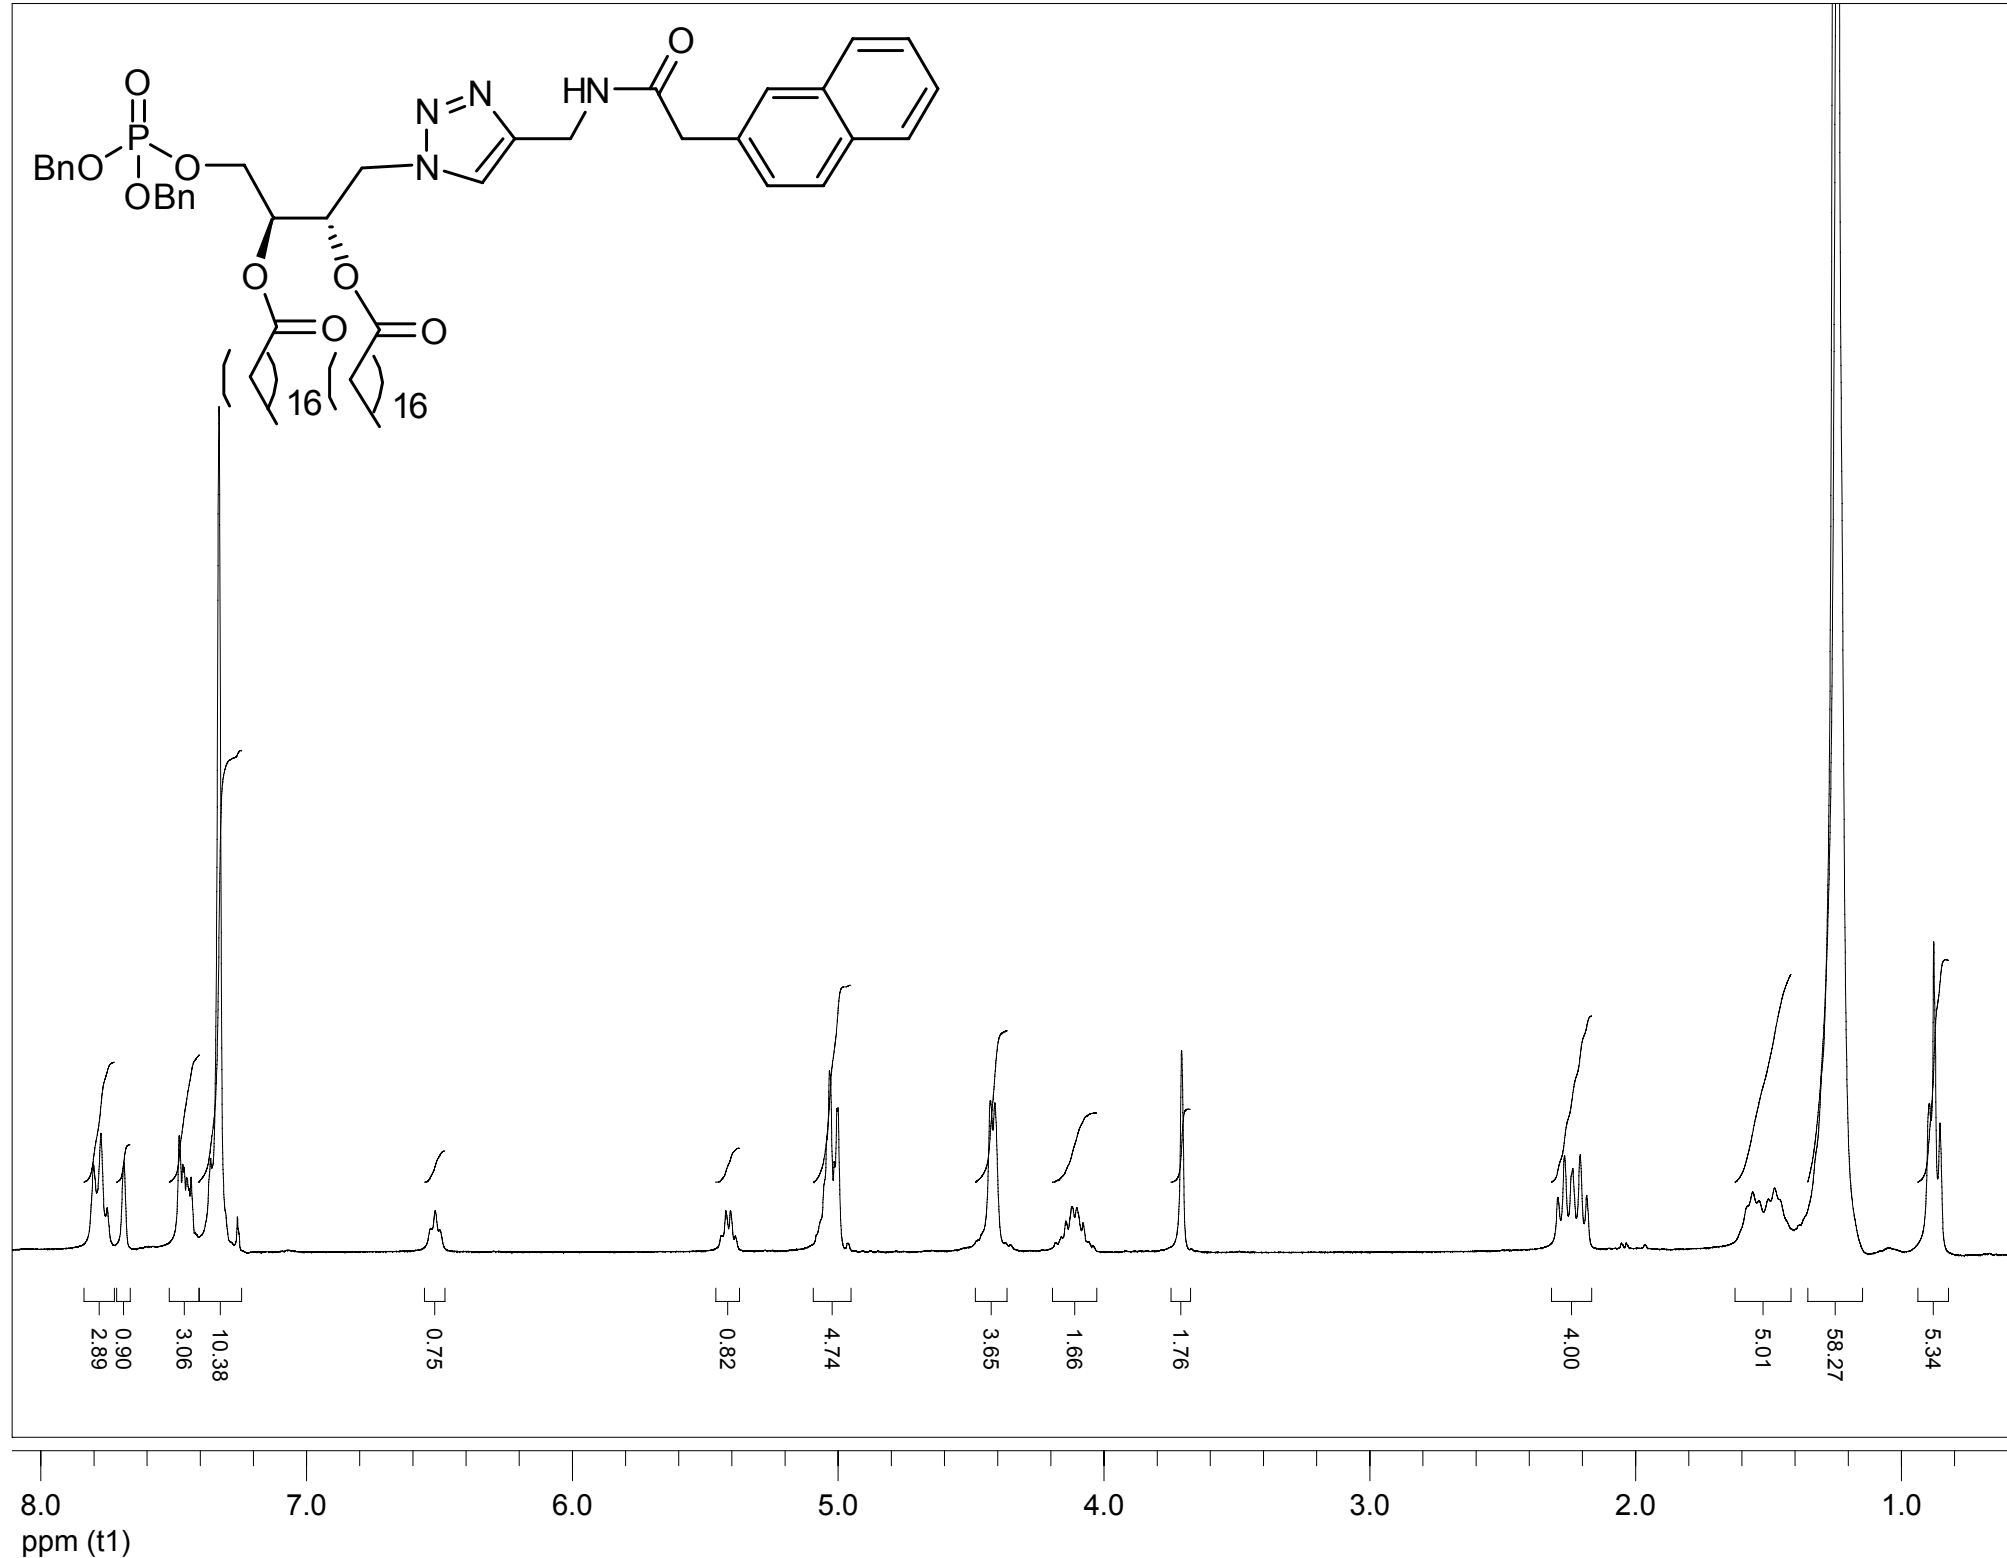

172.557  
172.161  
171.088

144.898  
135.486  
135.400  
133.460  
132.427  
132.189  
128.668  
128.618  
128.149  
128.006  
127.962  
127.619  
127.255  
126.245  
125.870  
123.506

69.646  
69.573  
69.131  
64.816  
64.805

49.858  
49.823  
43.588  
34.915  
33.933  
33.778  
31.921

29.710  
29.668  
29.488  
29.370  
29.274  
29.115  
29.066  
24.751  
24.684  
22.696  
14.147

-0.00000

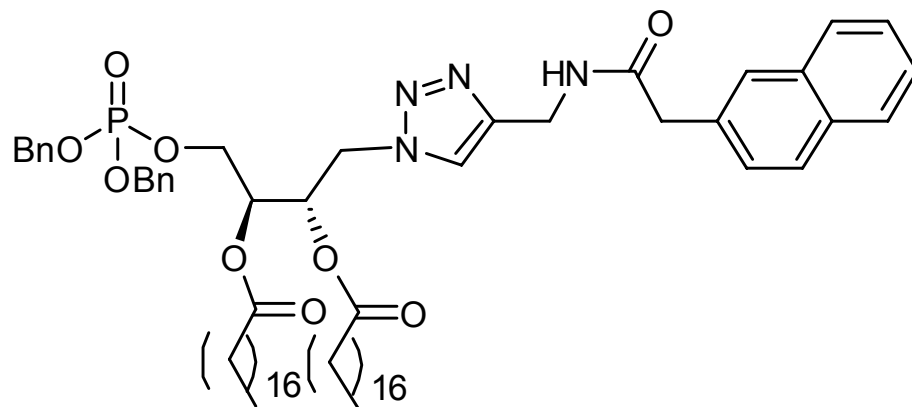

ppm (t1)

150

100

50

0



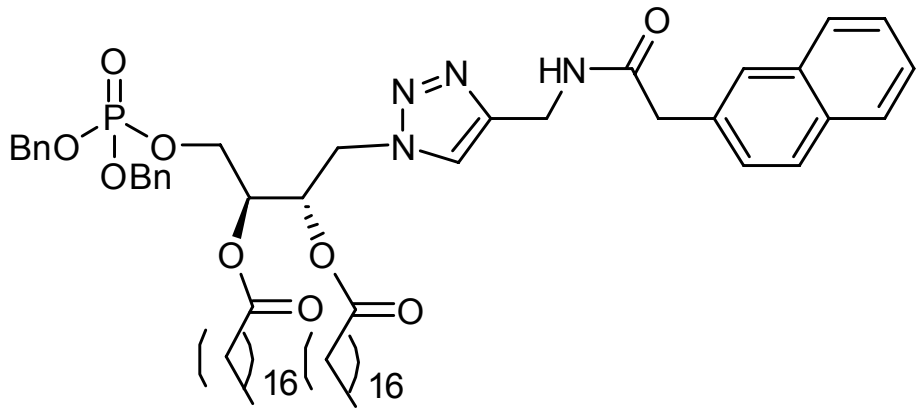

0.005

ppm (t1) 200 100 0 -100 -200 S21

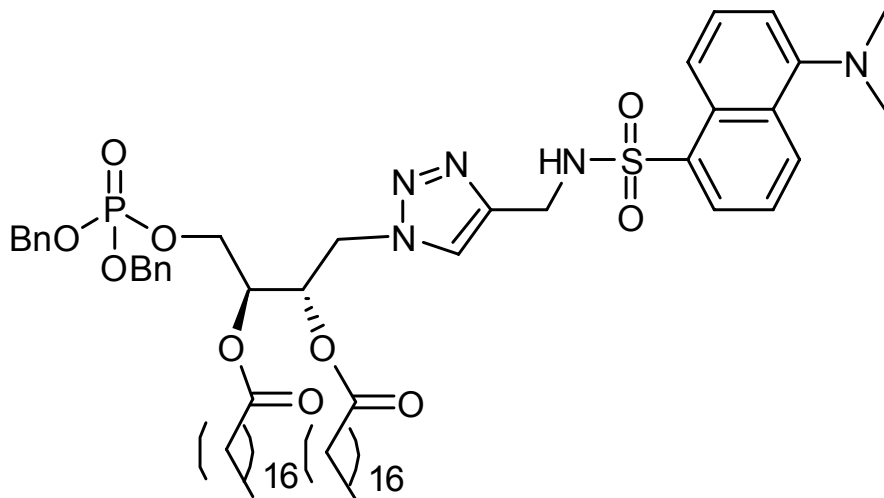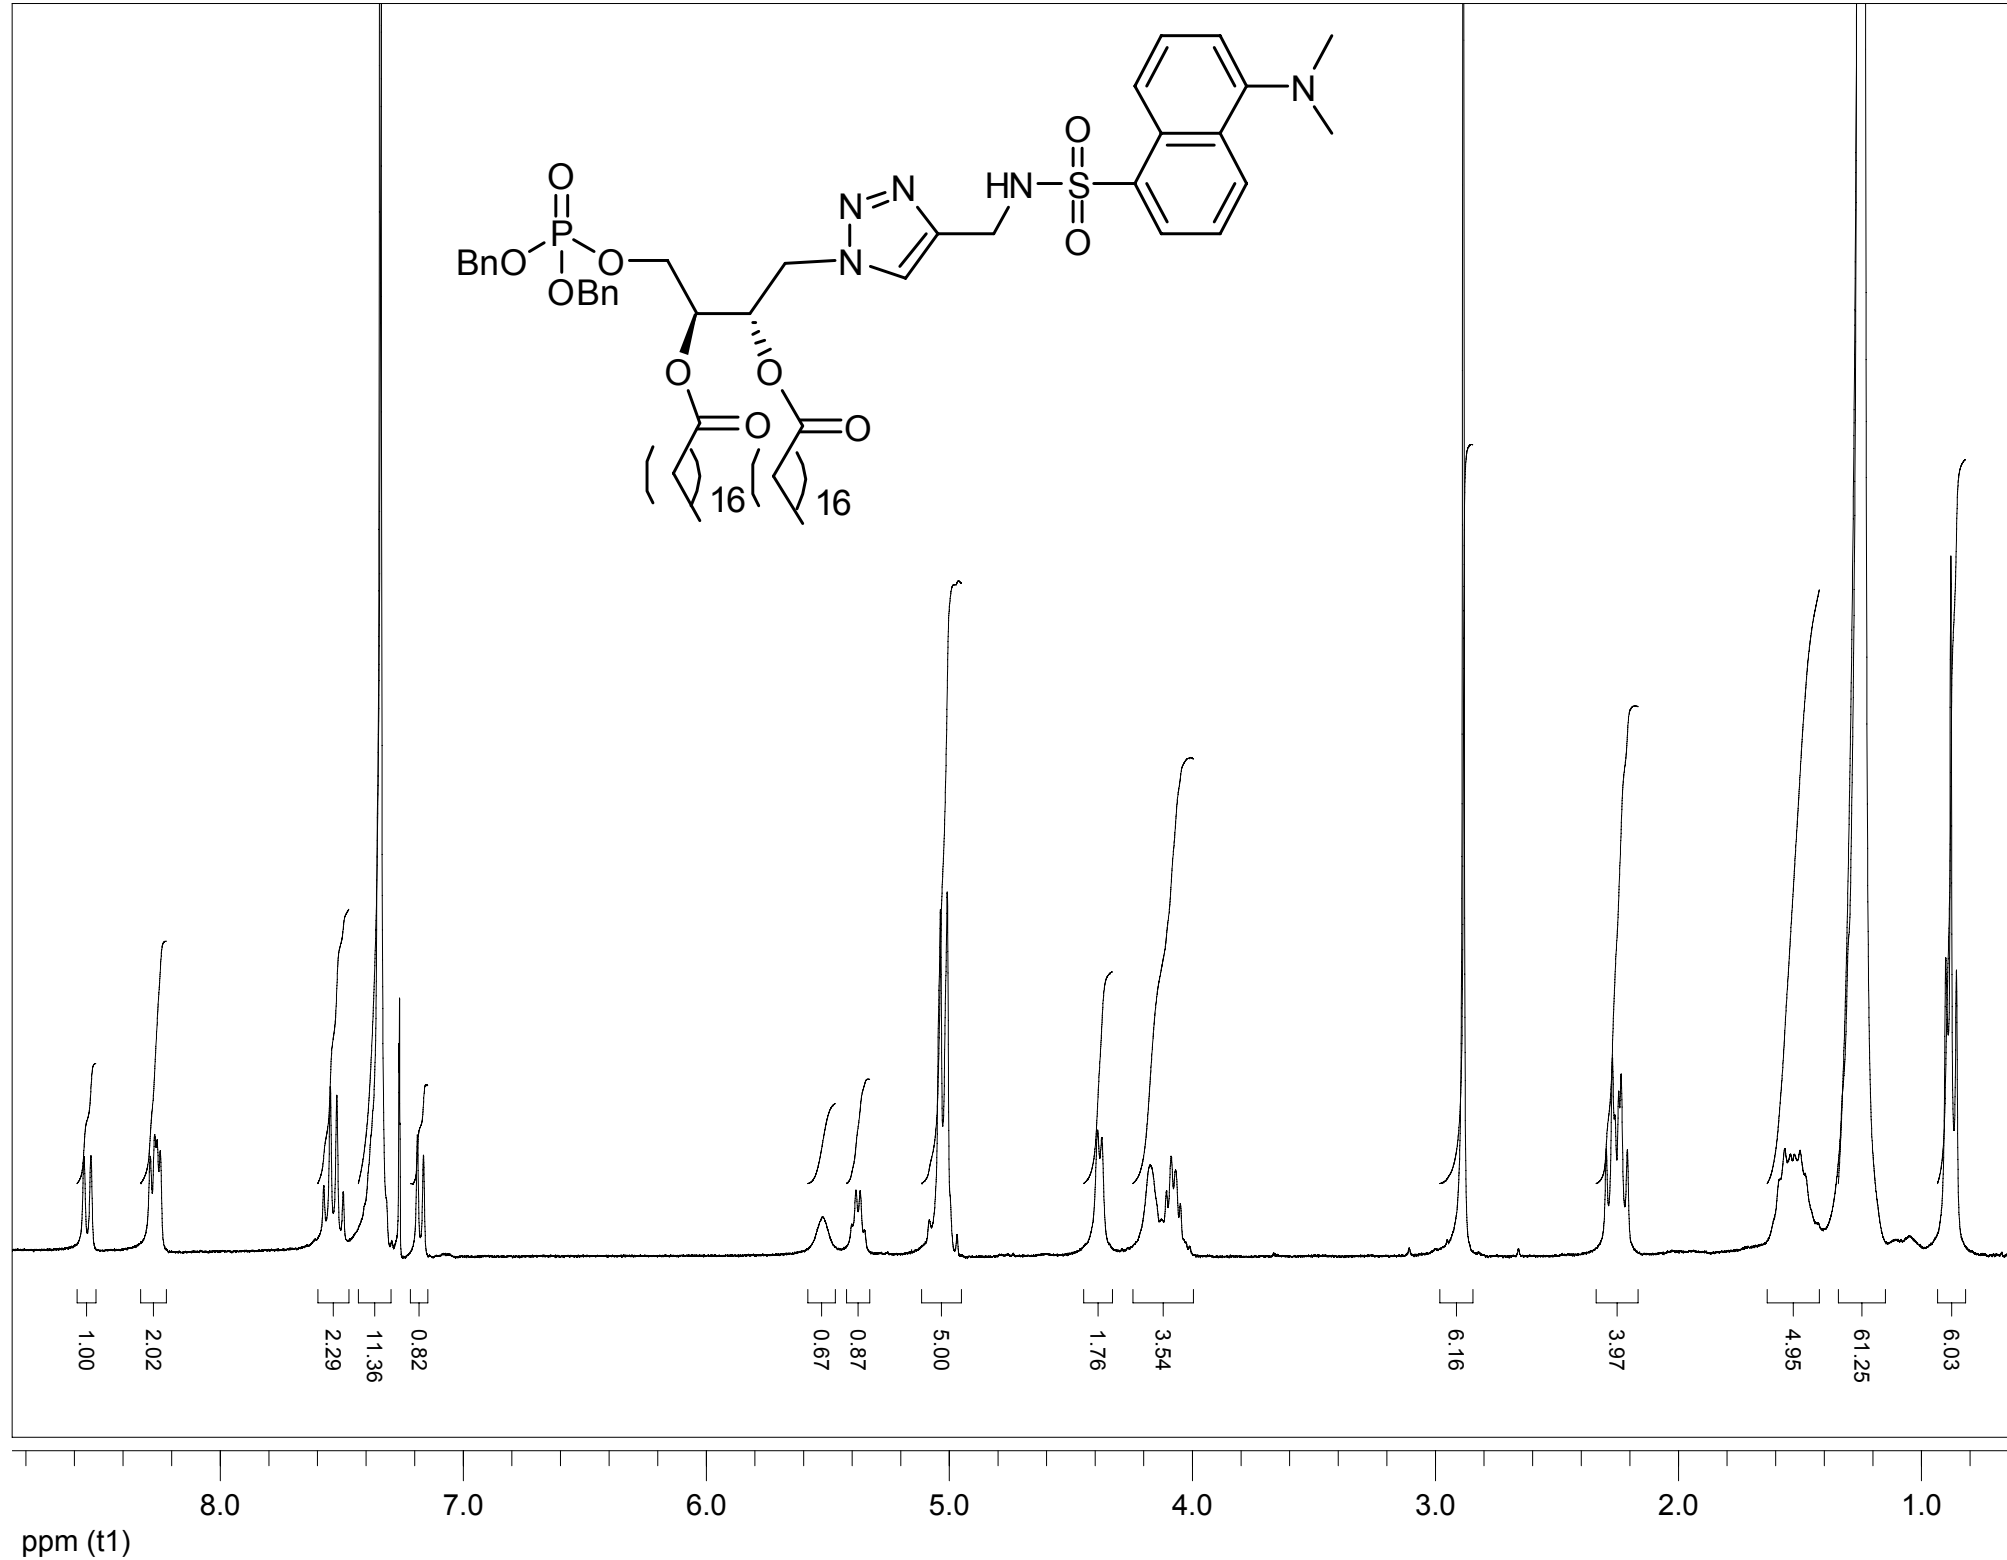

172.682  
172.352  
  
151.974  
  
144.489  
135.623  
135.535  
134.707  
130.580  
129.936  
129.673  
129.568  
128.751  
128.715  
128.578  
128.108  
128.068  
123.526  
123.216  
118.920  
115.341

69.758  
69.684  
69.156  
65.010  
64.942

49.909  
45.486  
38.788  
34.035  
33.883  
32.017  
29.807  
29.760  
29.590  
29.462  
29.381  
29.357  
29.217  
29.161  
24.848  
24.764  
22.787  
14.231

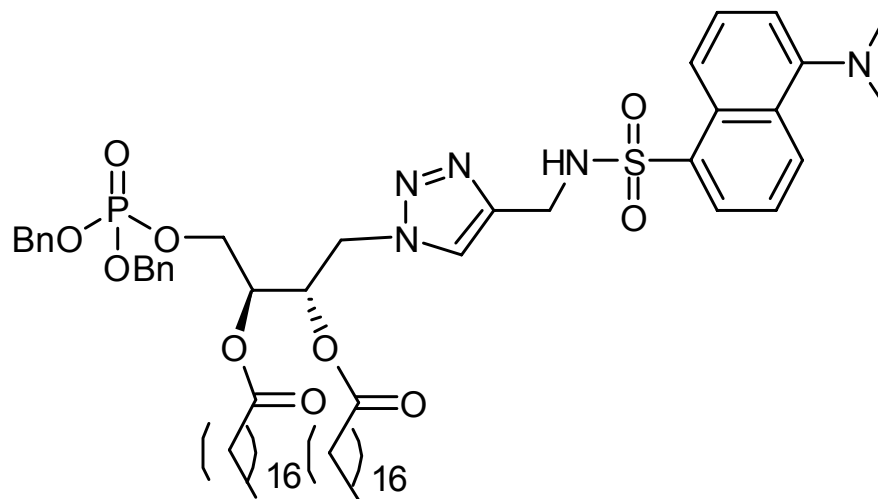

ppm (t1)

150

100

50

S23

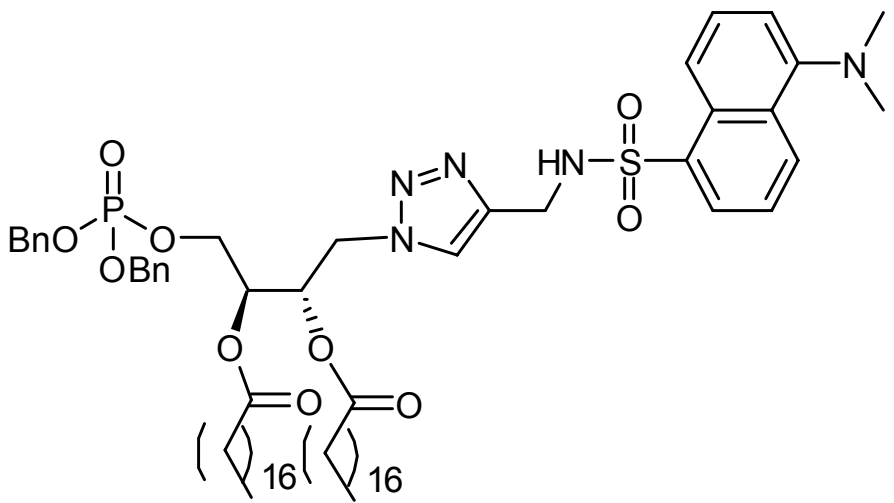

-0.053

0.0

5.0

-5.0

S24

ppm (t1)

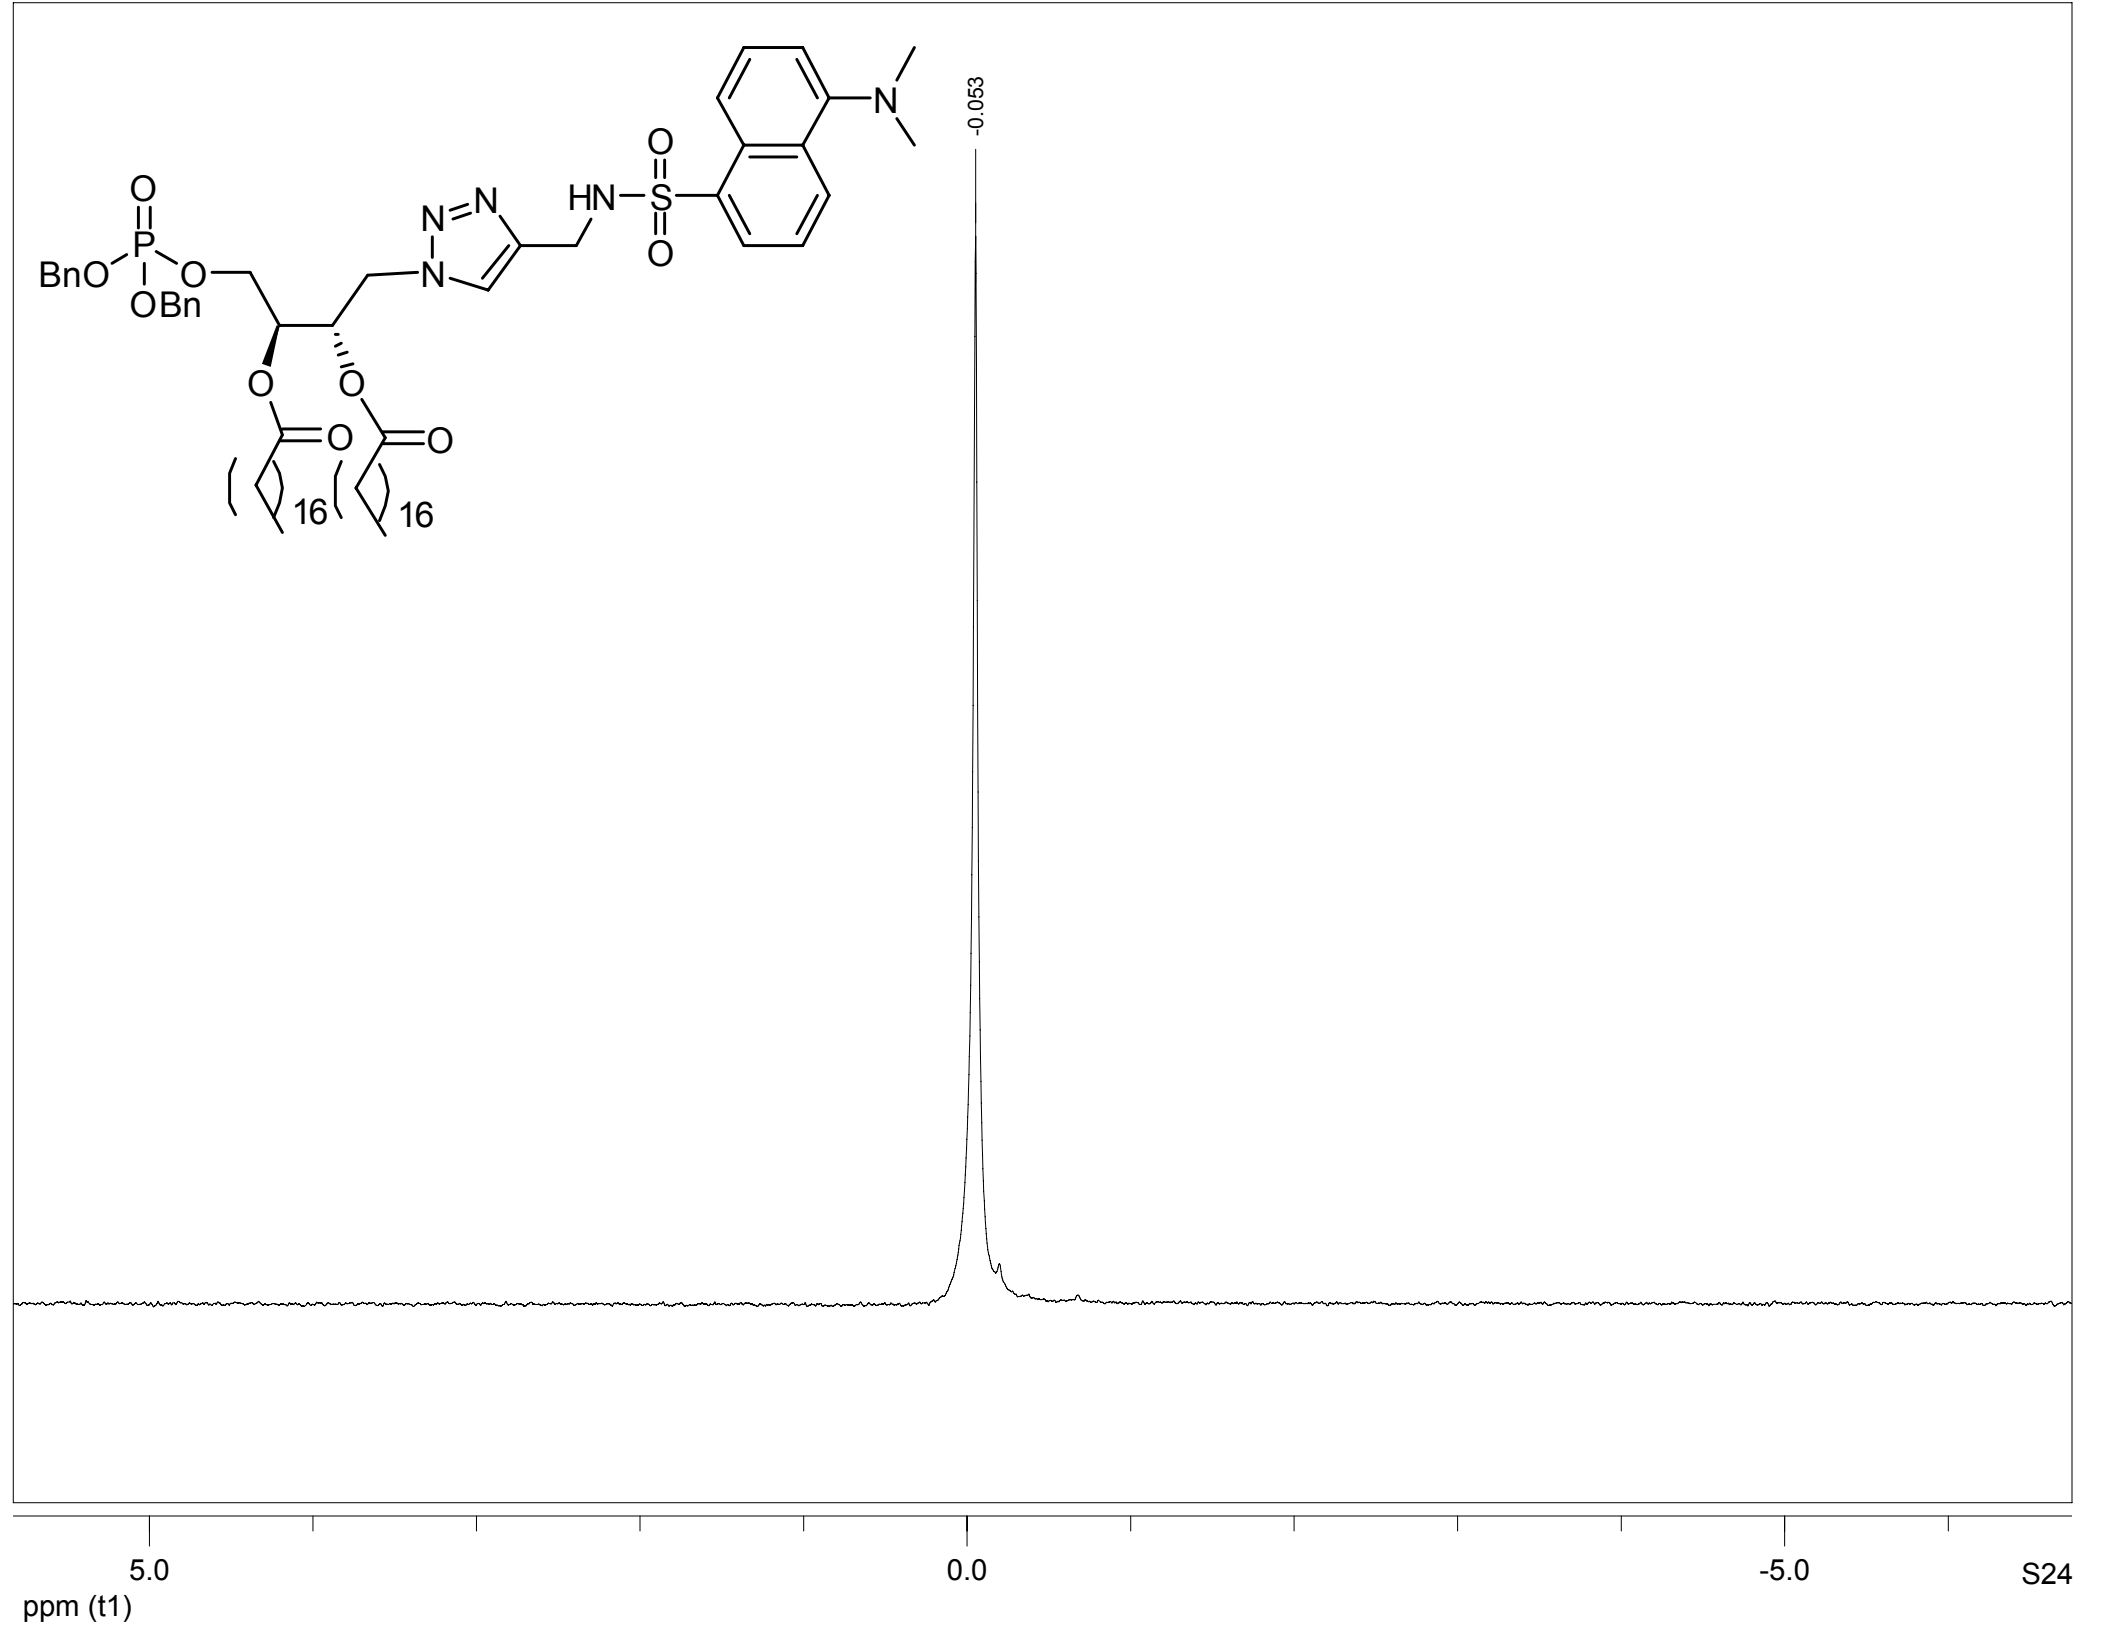

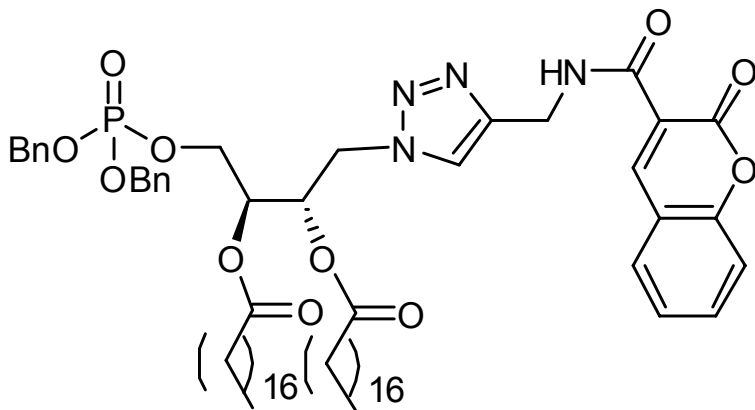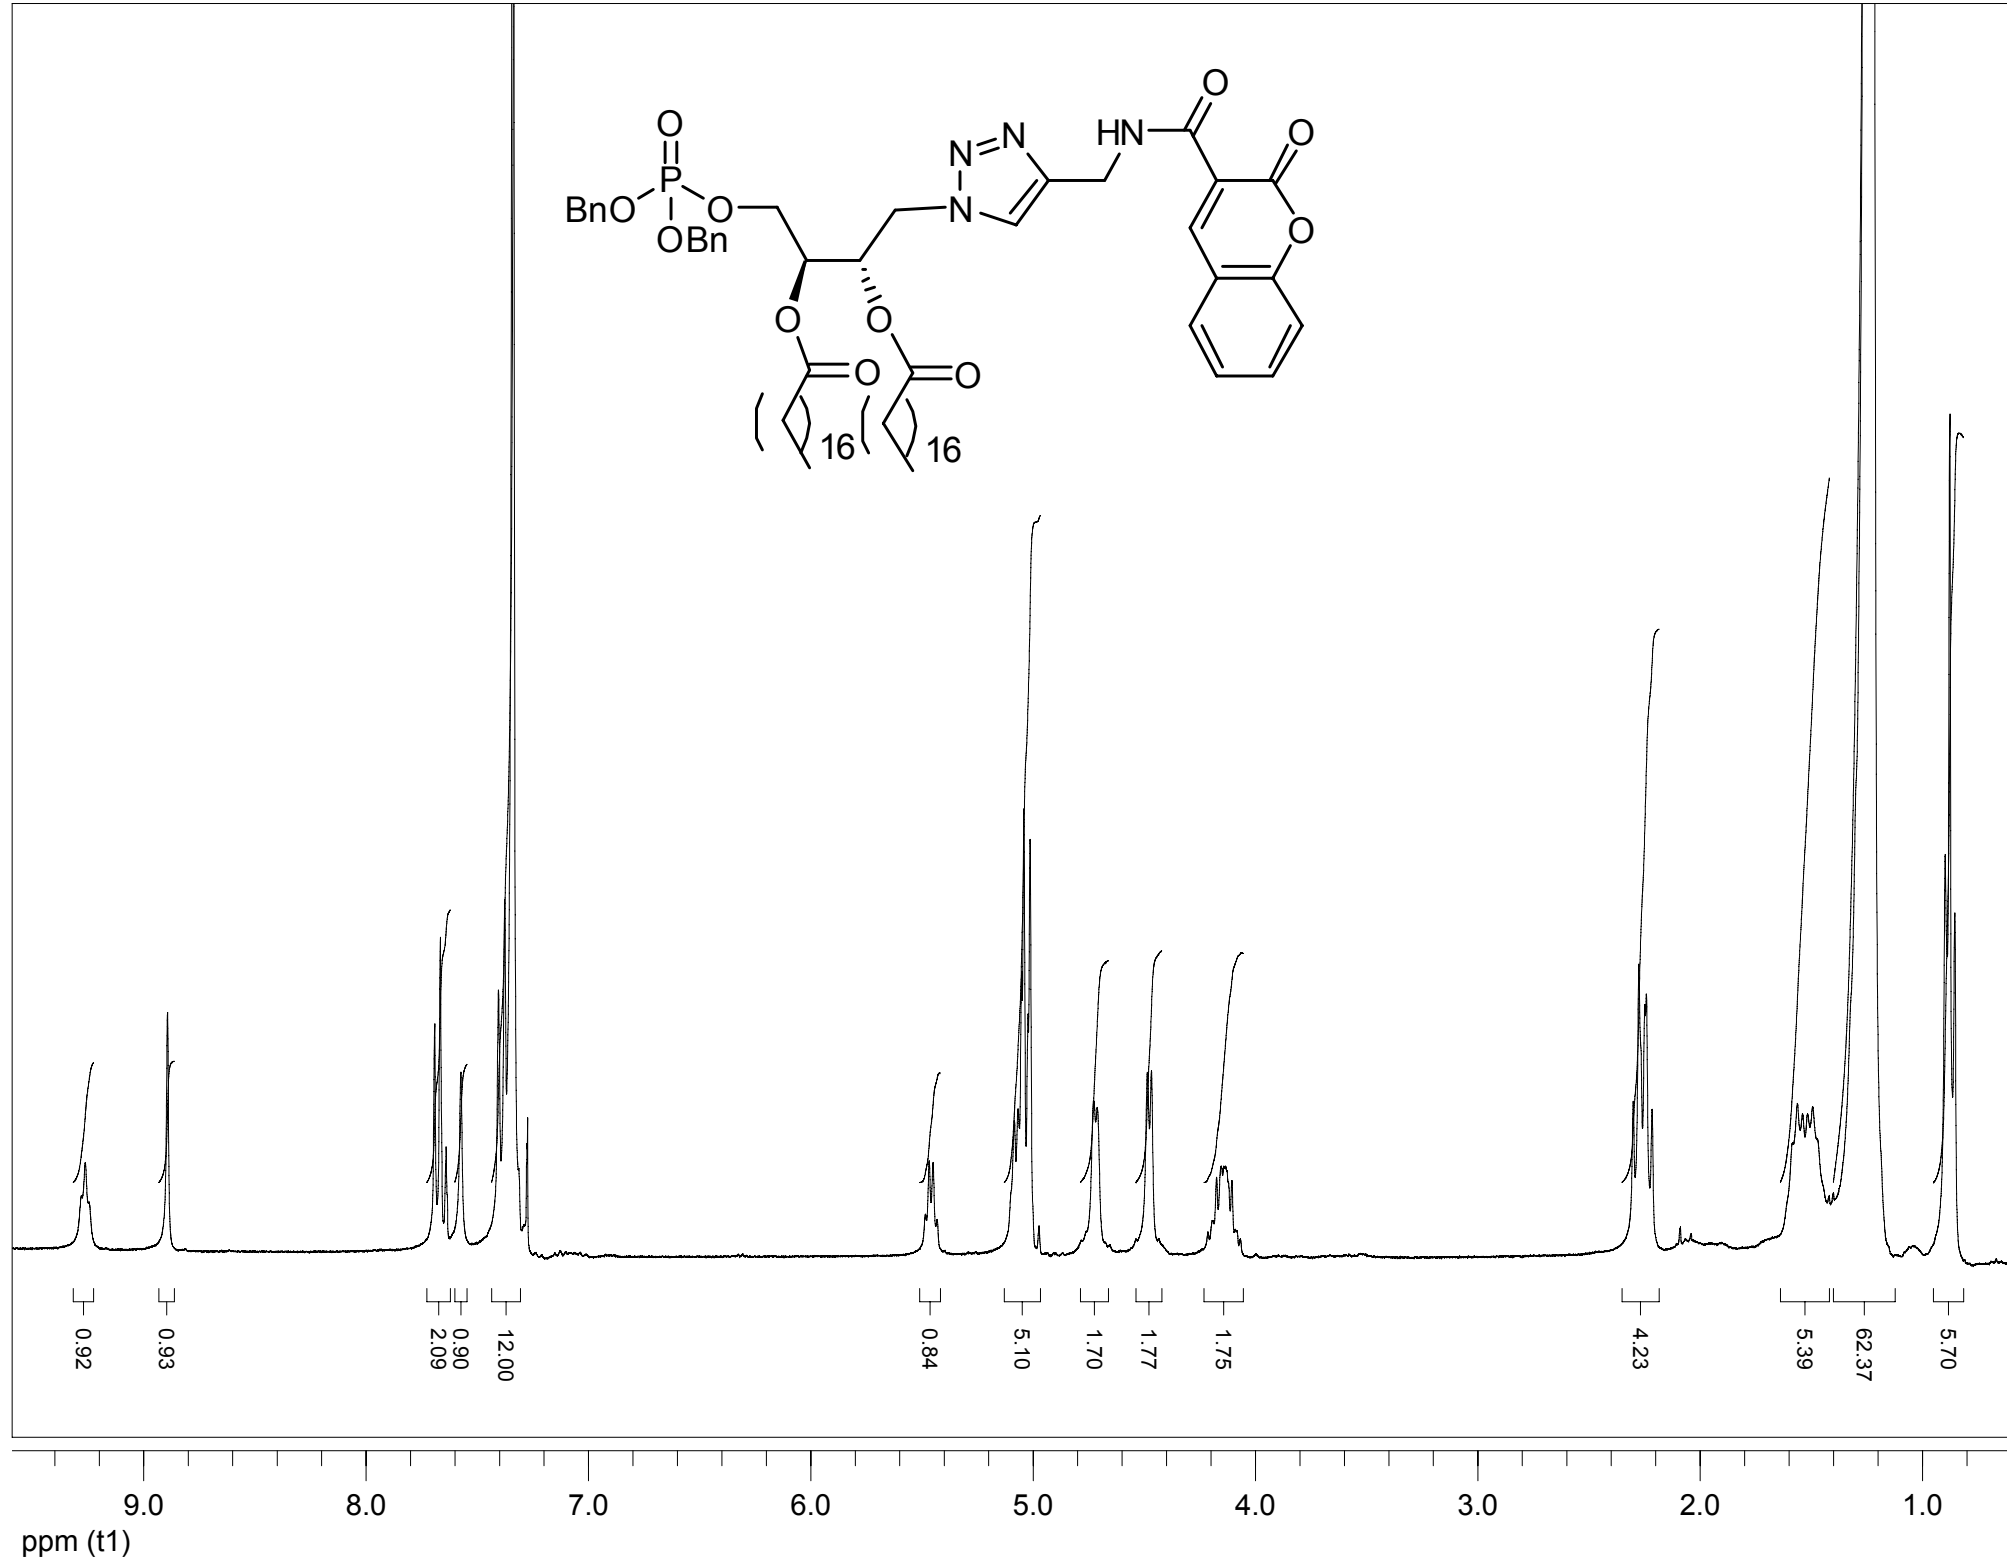

172.531  
172.183  
  
161.671  
161.091  
154.497  
  
148.382  
144.885  
  
135.601  
135.539  
134.155  
129.794  
128.651  
128.021  
125.273  
123.288  
118.546  
118.310  
116.659  
  
69.661  
69.221  
64.896  
  
49.906  
  
35.470  
33.974  
33.835  
31.926  
29.707  
29.487  
29.358  
29.272  
29.129  
24.772  
24.702  
22.687  
14.115  
  
0.000

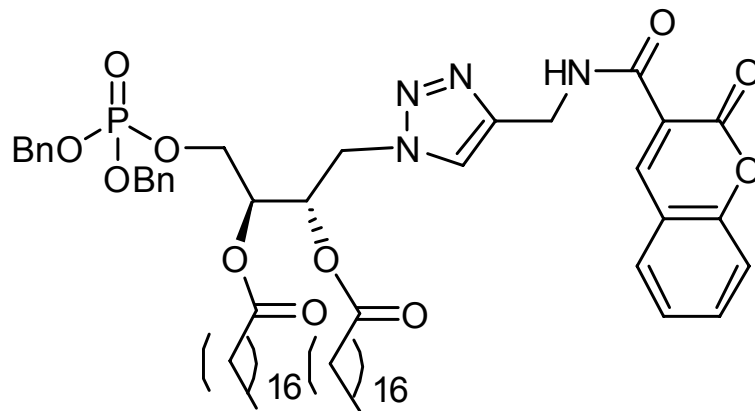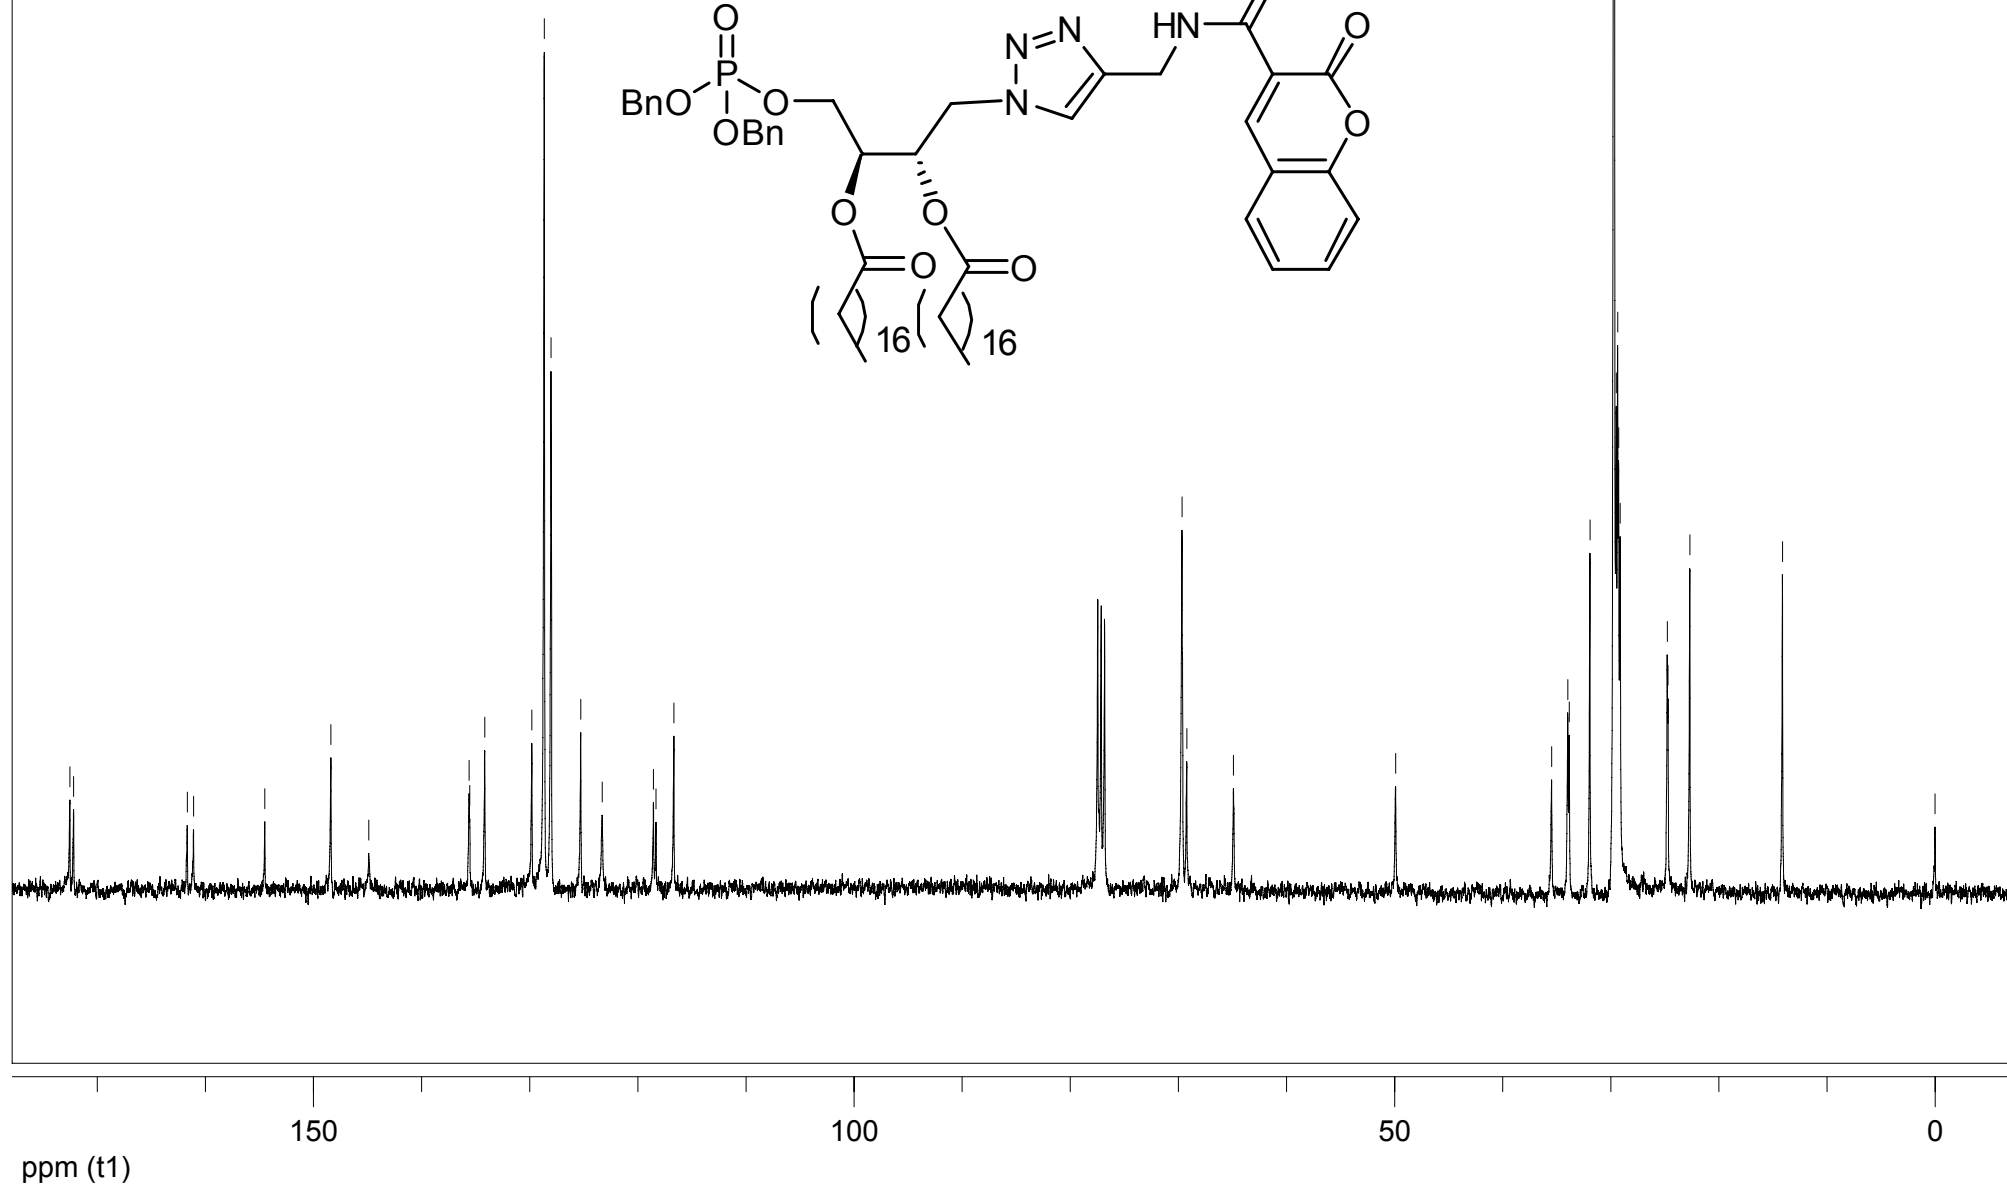

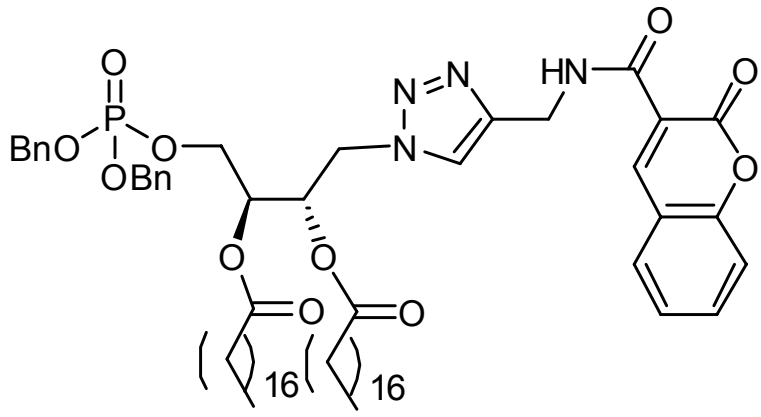

0.031

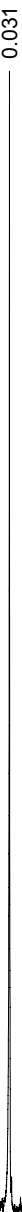

50 ppm (t1) 0 -50 S27





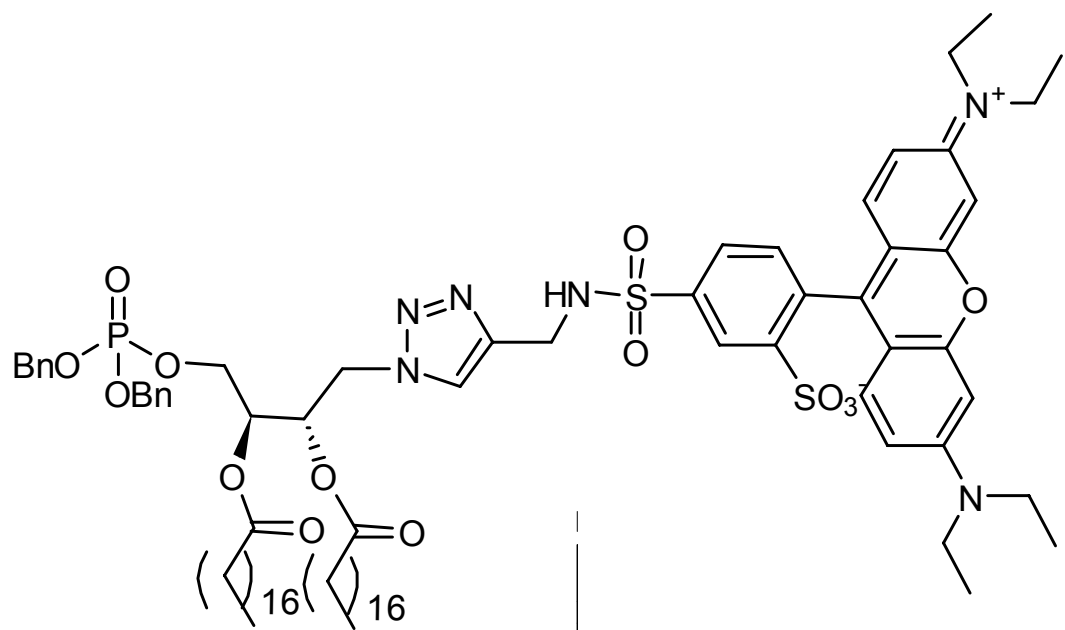

172.595  
172.251  
159.012  
157.845  
155.670  
155.546  
147.445  
142.263  
135.829  
135.763  
133.732  
133.666  
133.318  
129.634  
128.644  
128.532  
128.427  
127.968  
127.438  
127.168  
125.084  
114.345  
113.711  
113.639  
95.551  
70.008  
69.940  
69.627  
69.570  
69.493  
69.442  
68.908  
65.197  
50.095  
45.832  
38.805  
34.064  
33.890  
31.938  
29.724  
29.536  
29.366  
29.128  
24.800  
24.677  
22.695  
14.117  
12.628

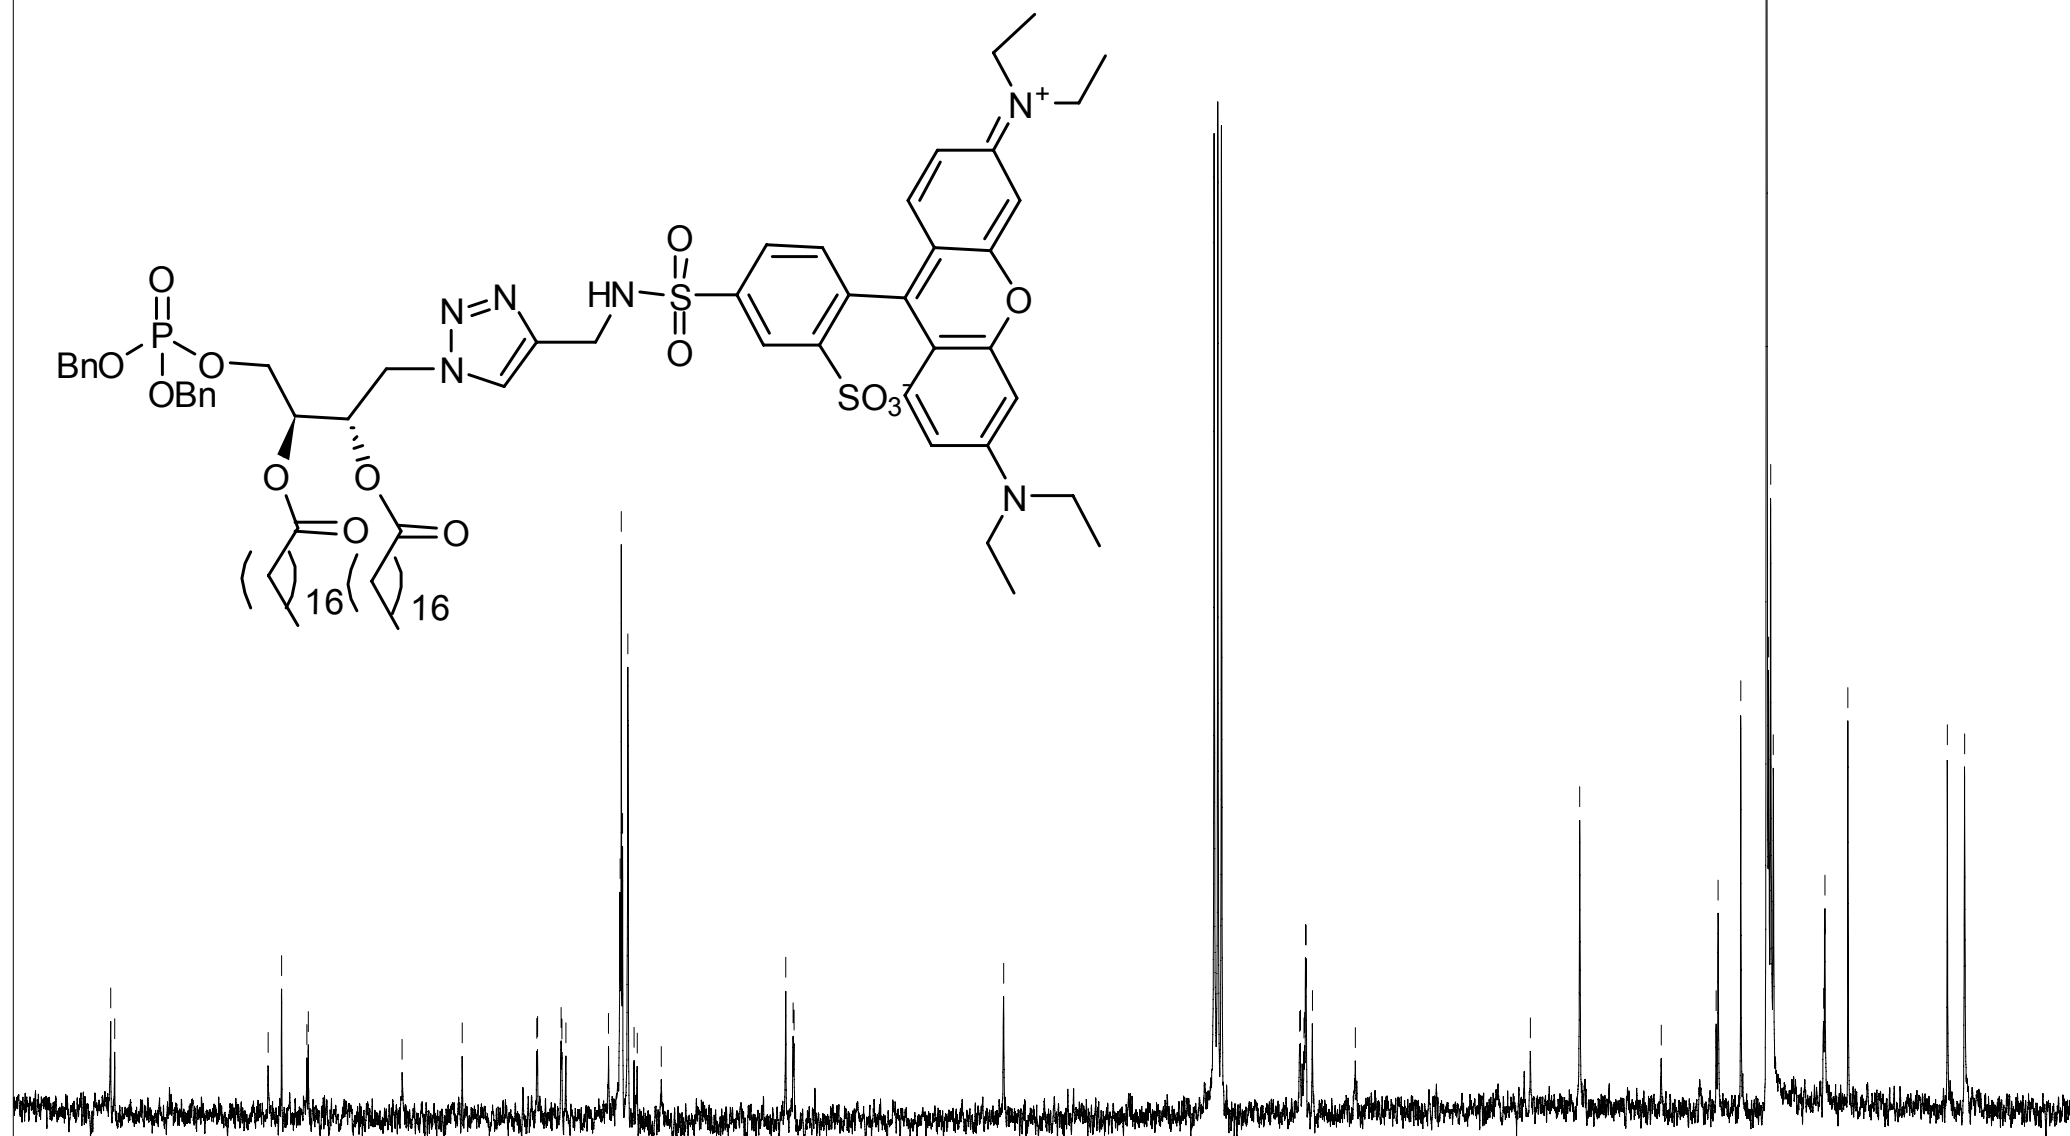

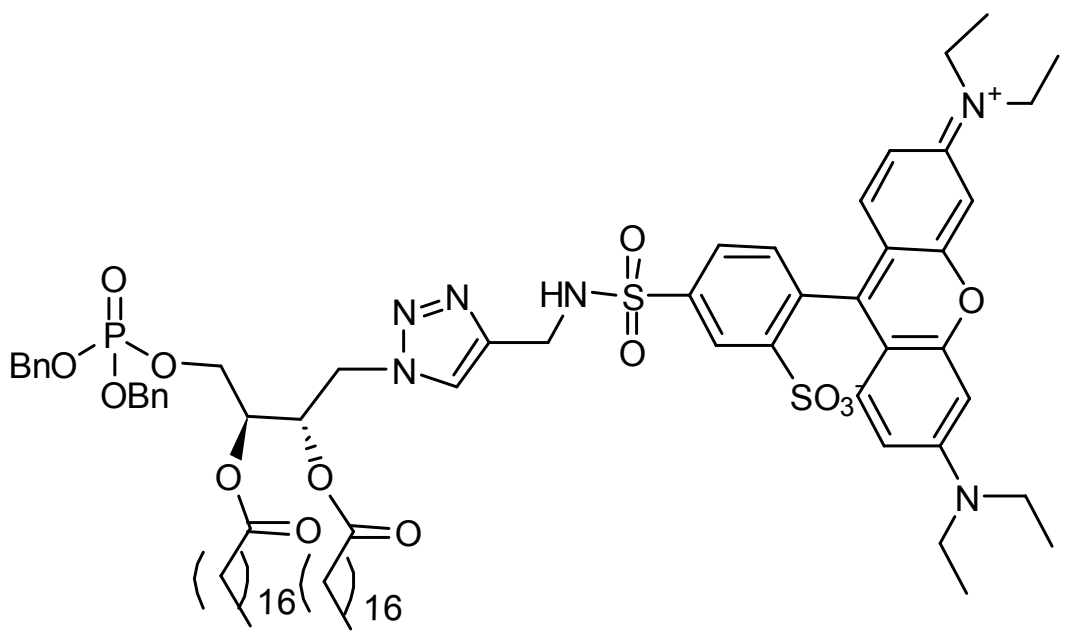

-0.242

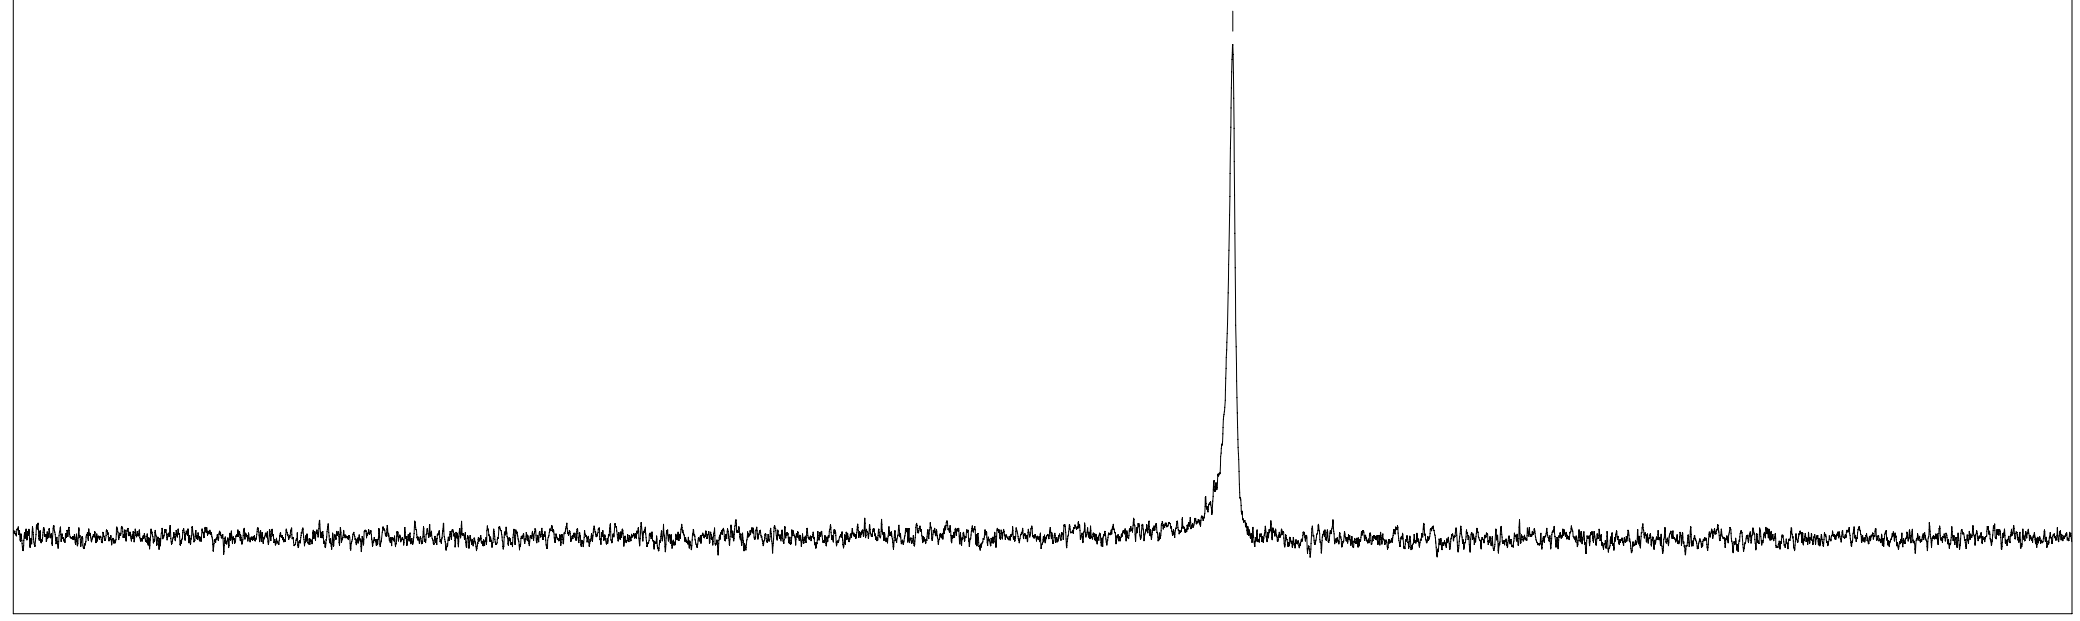

ppm (t1) 10.0 5.0 0.0 -5.0 S30

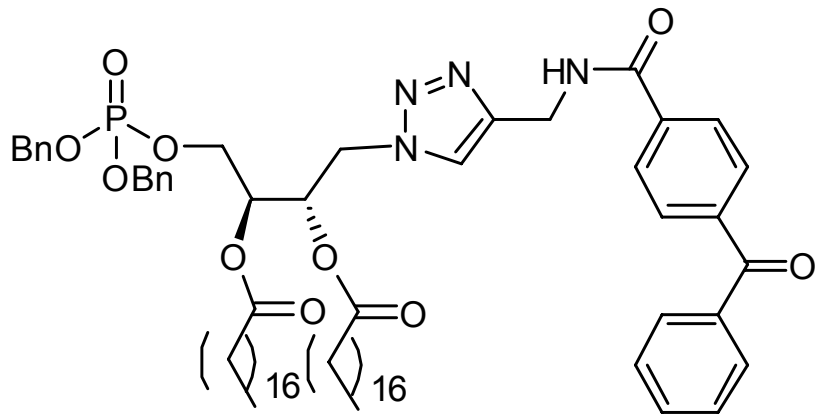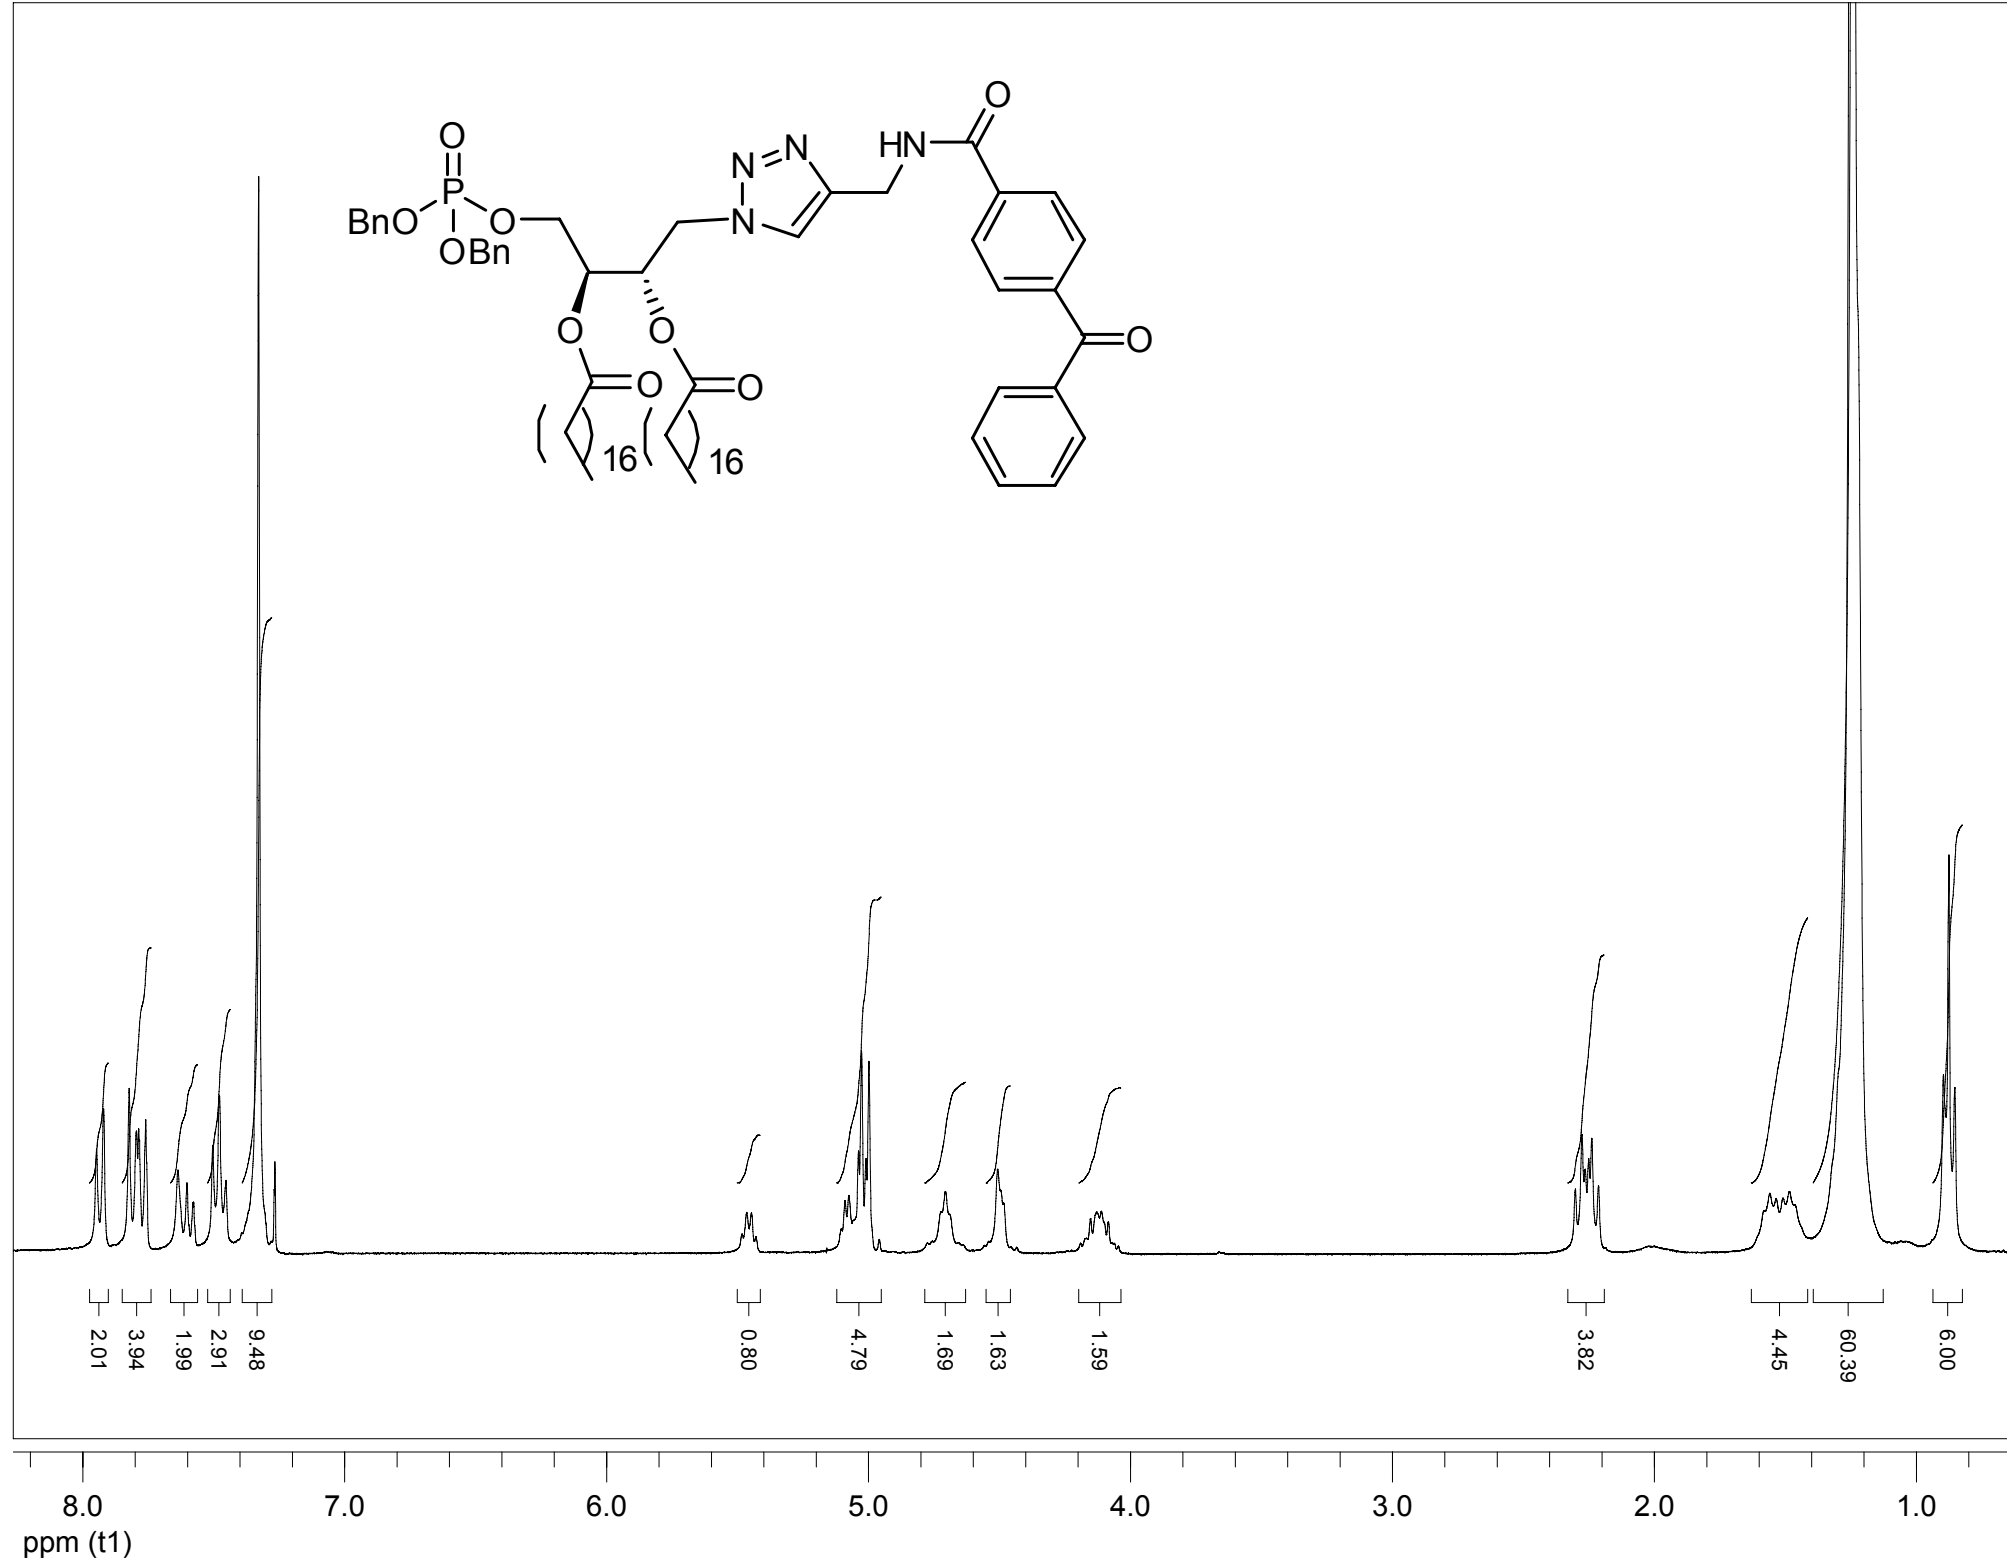

195.816

172.570

172.208

166.524

140.144

137.243

137.078

135.535

135.472

132.787

130.037

128.648

128.405

128.013

127.971

127.148

123.621

69.691

69.644

69.238

64.873

64.832

50.038

35.505

33.979

33.845

31.928

29.711

29.495

29.363

29.273

29.139

29.095

24.787

24.718

22.691

14.116

0.0000

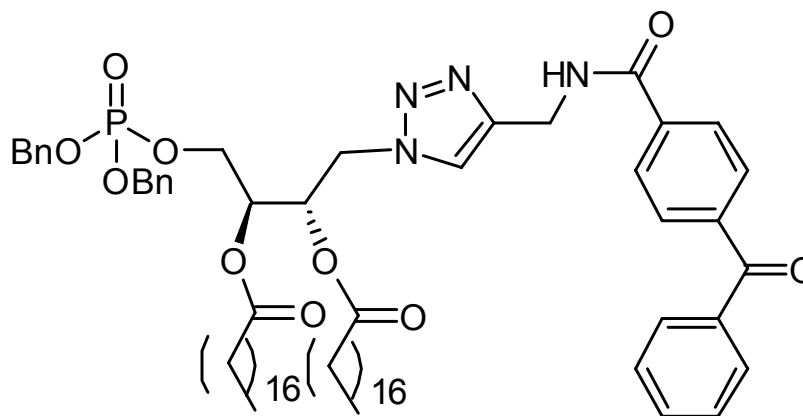200  
ppm (t1)

150

100

50

0

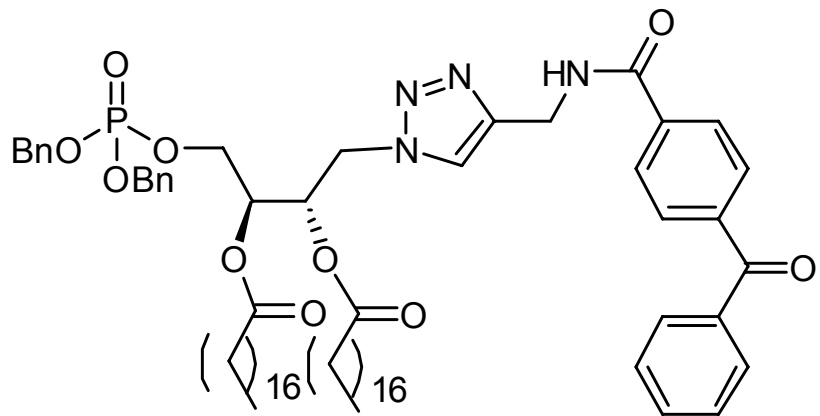

-0.056

0.0

5.0

S33

ppm (t1)

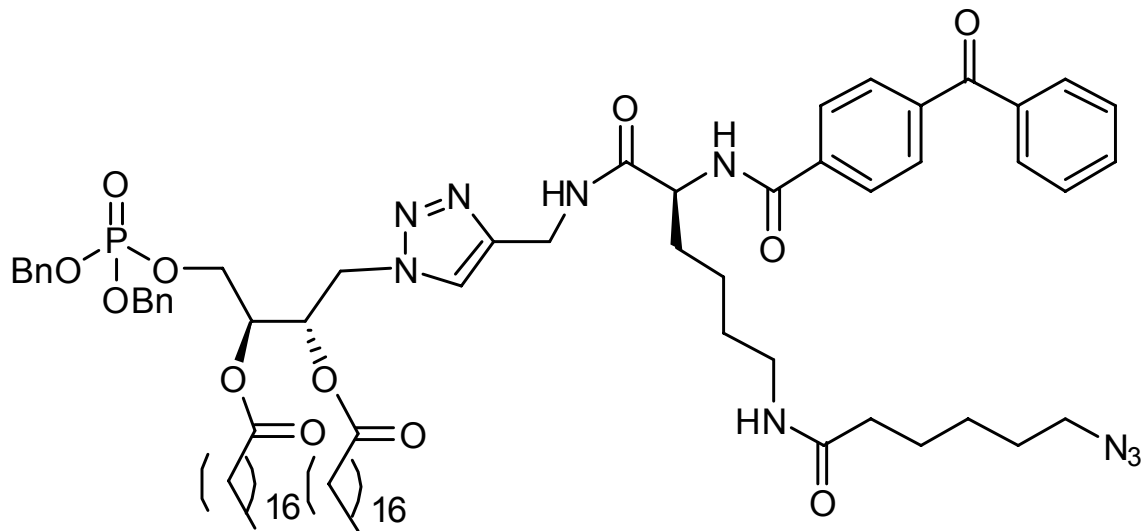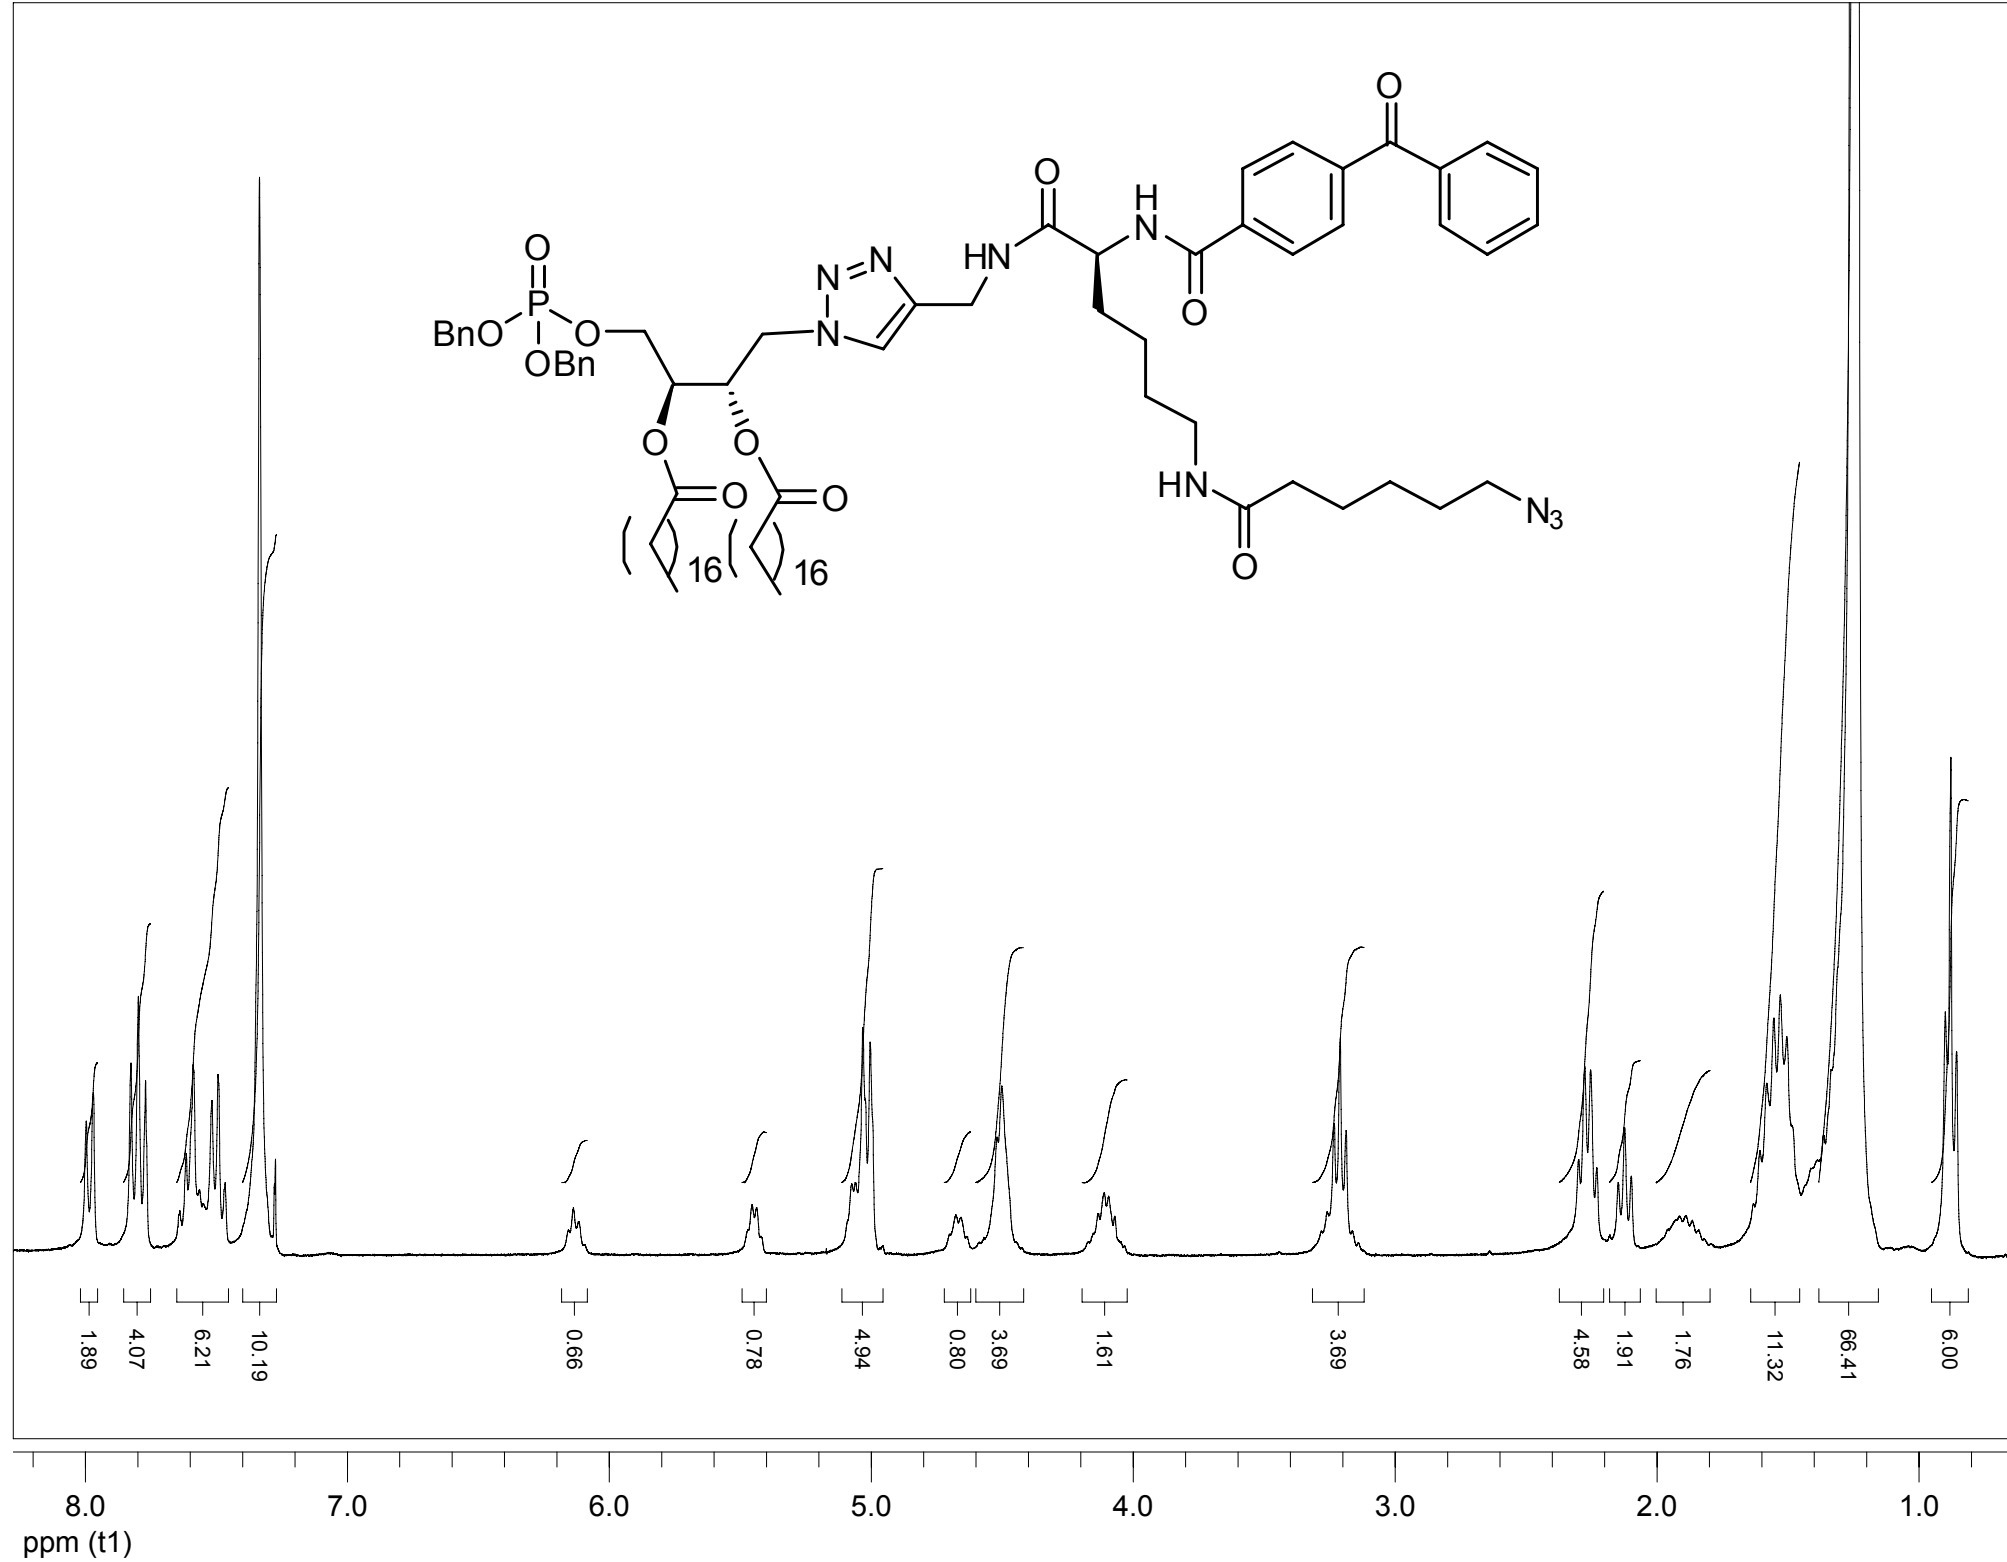



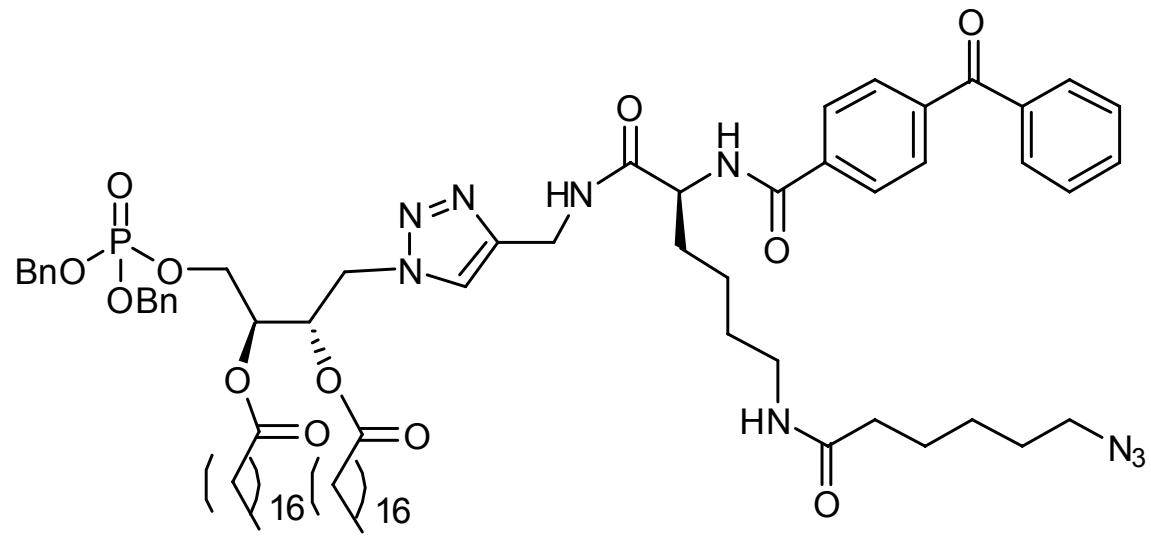

-0.251

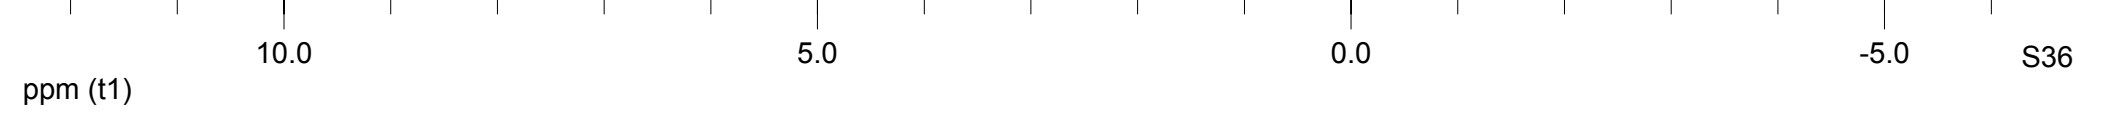



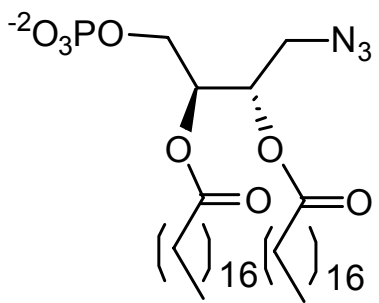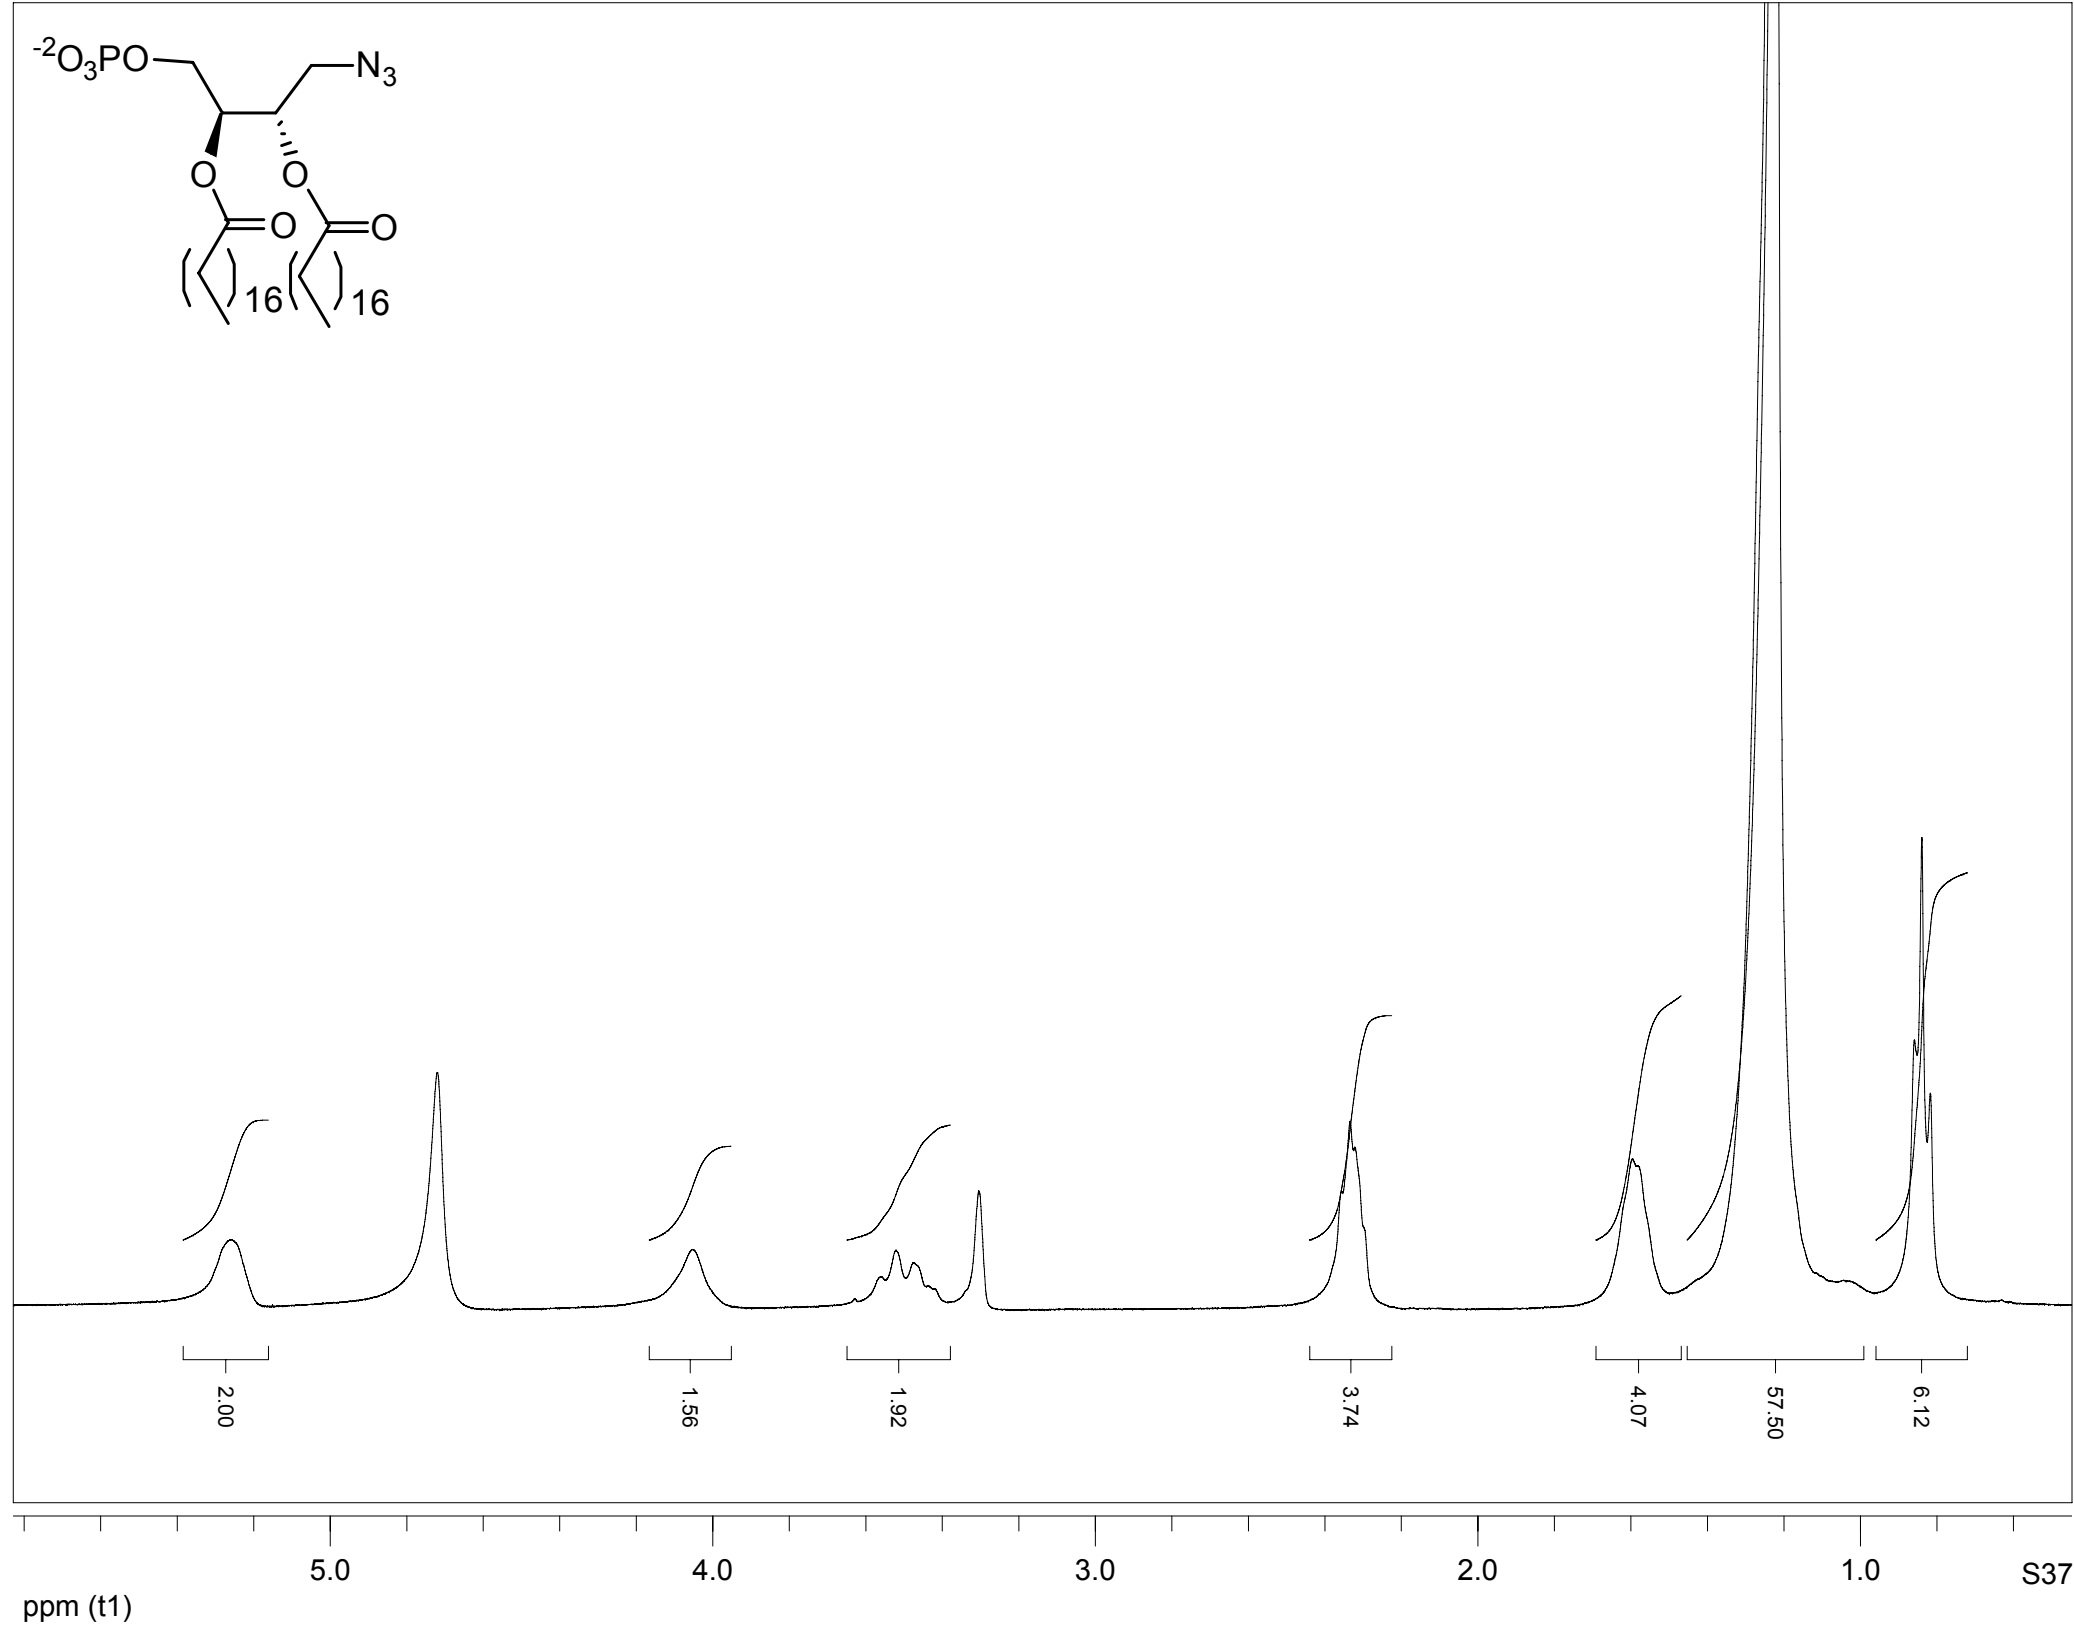





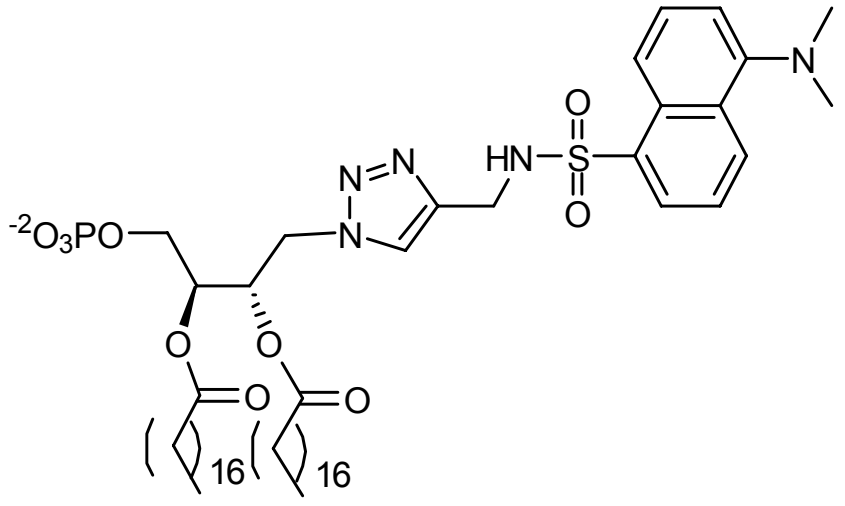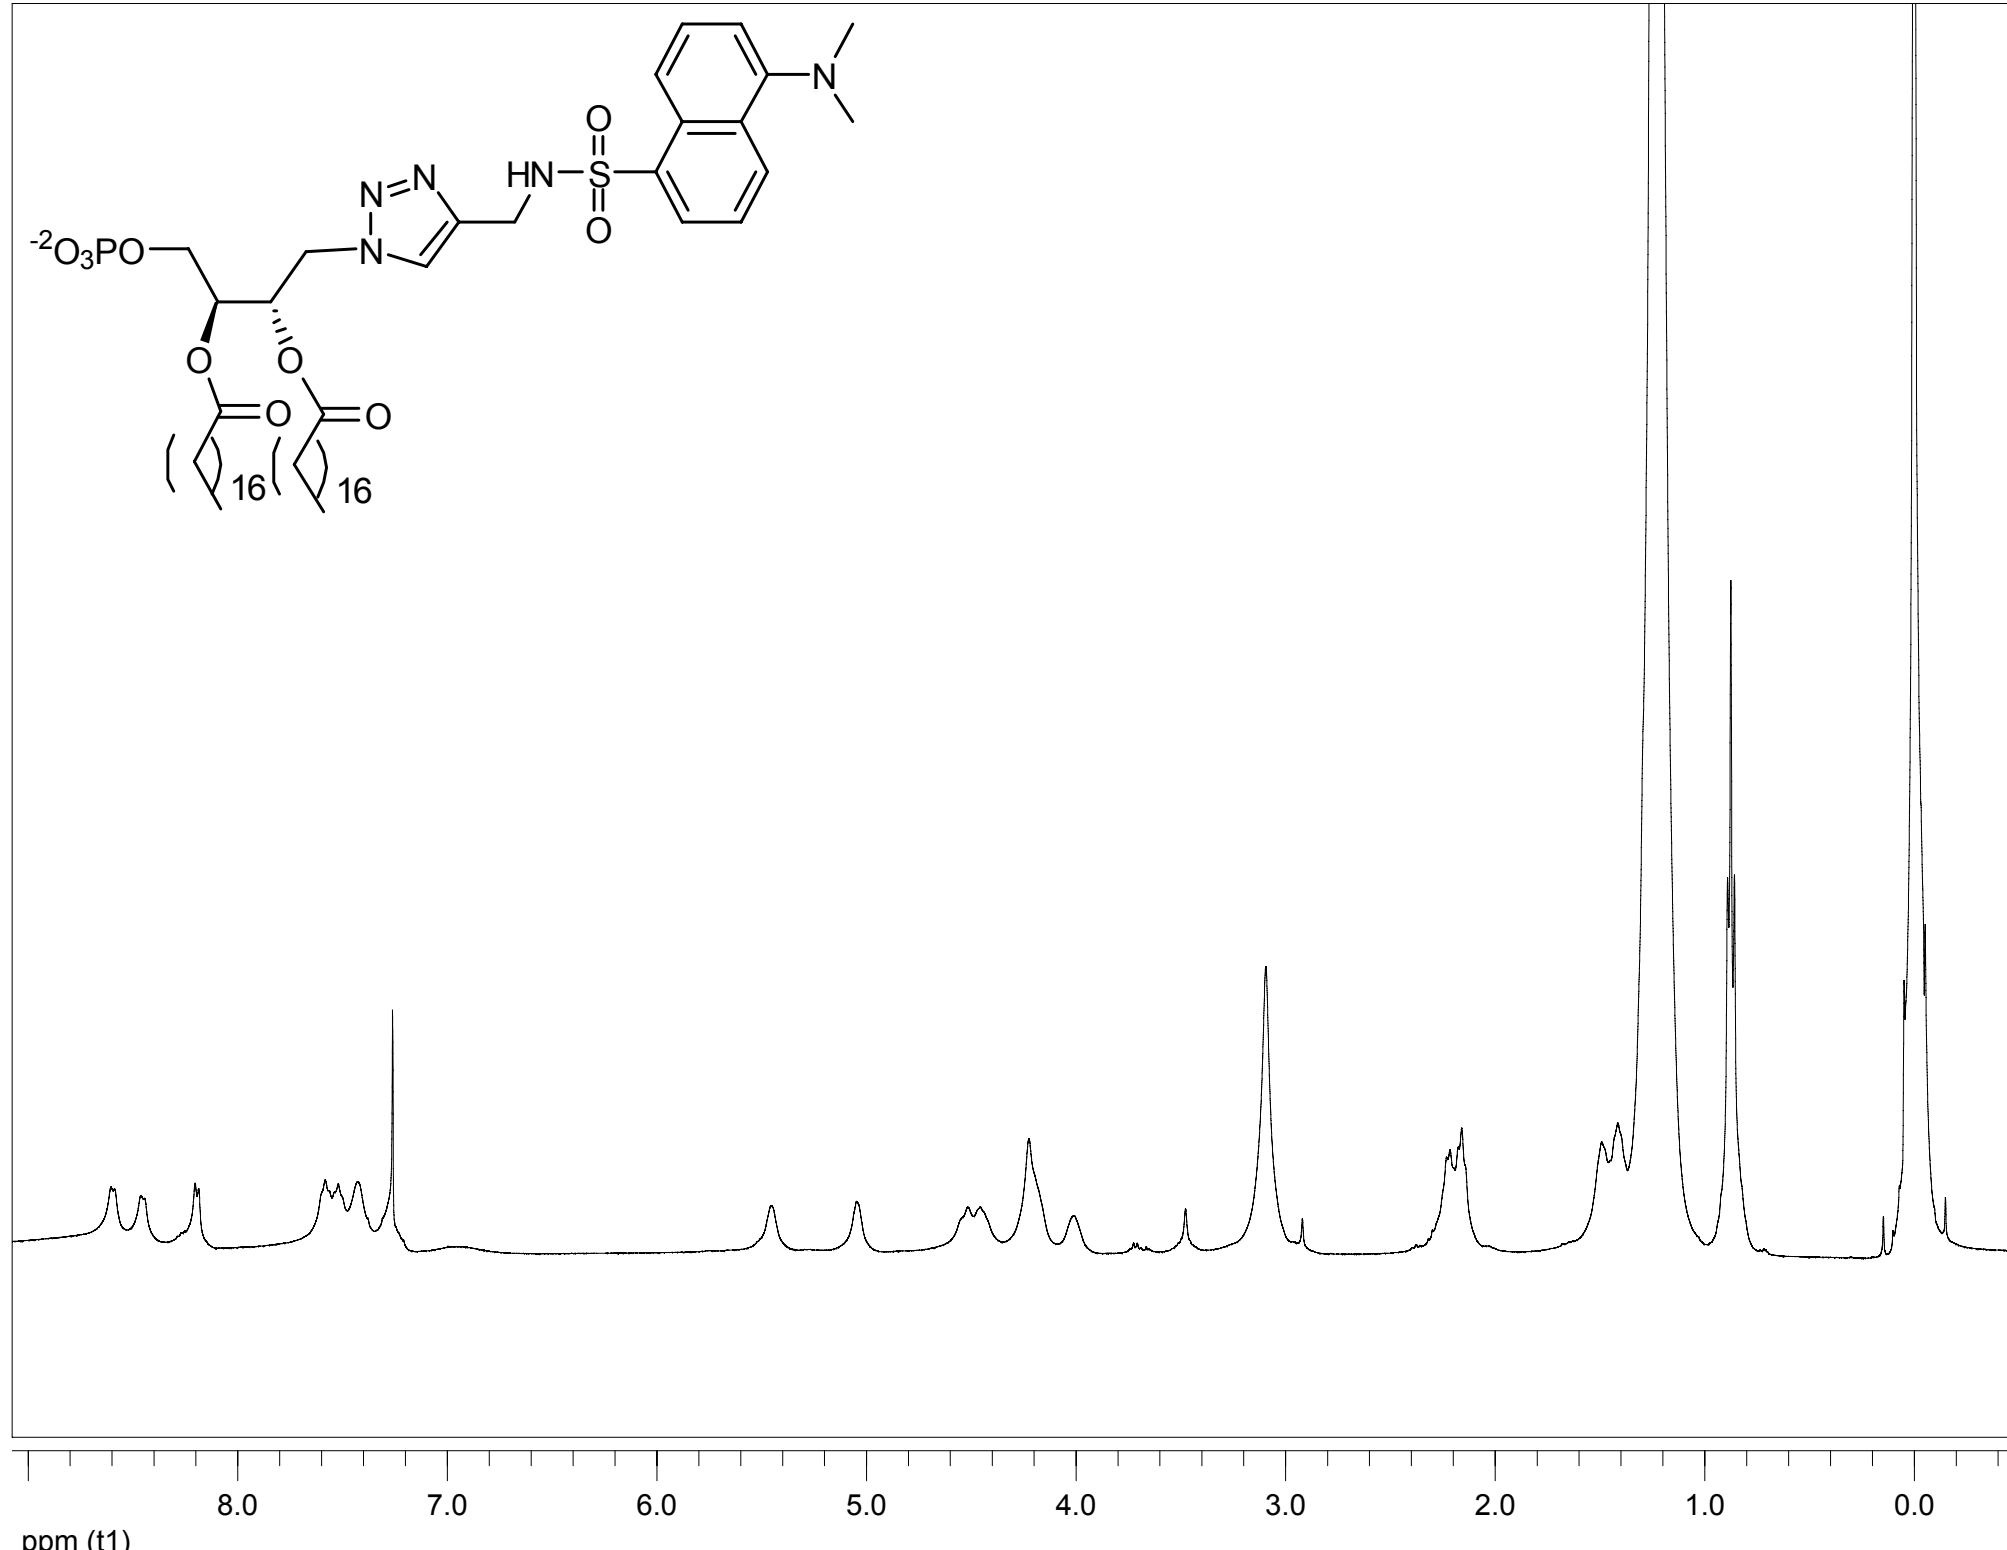

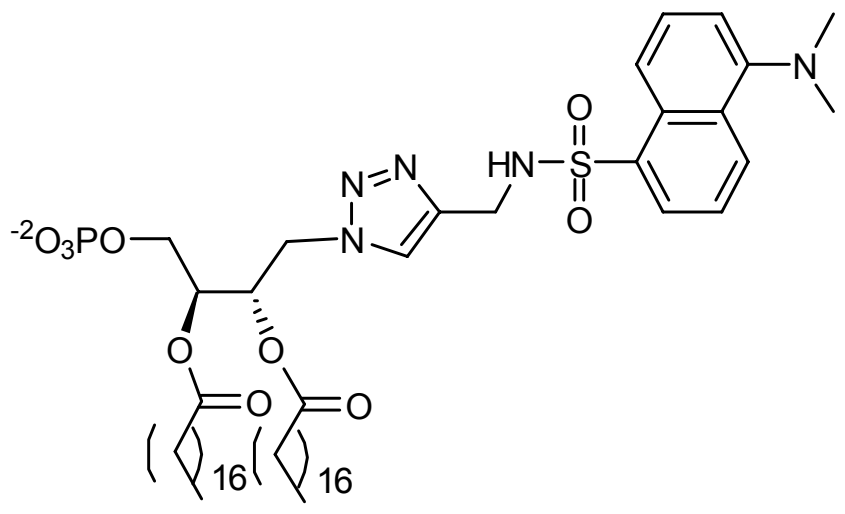

1.094

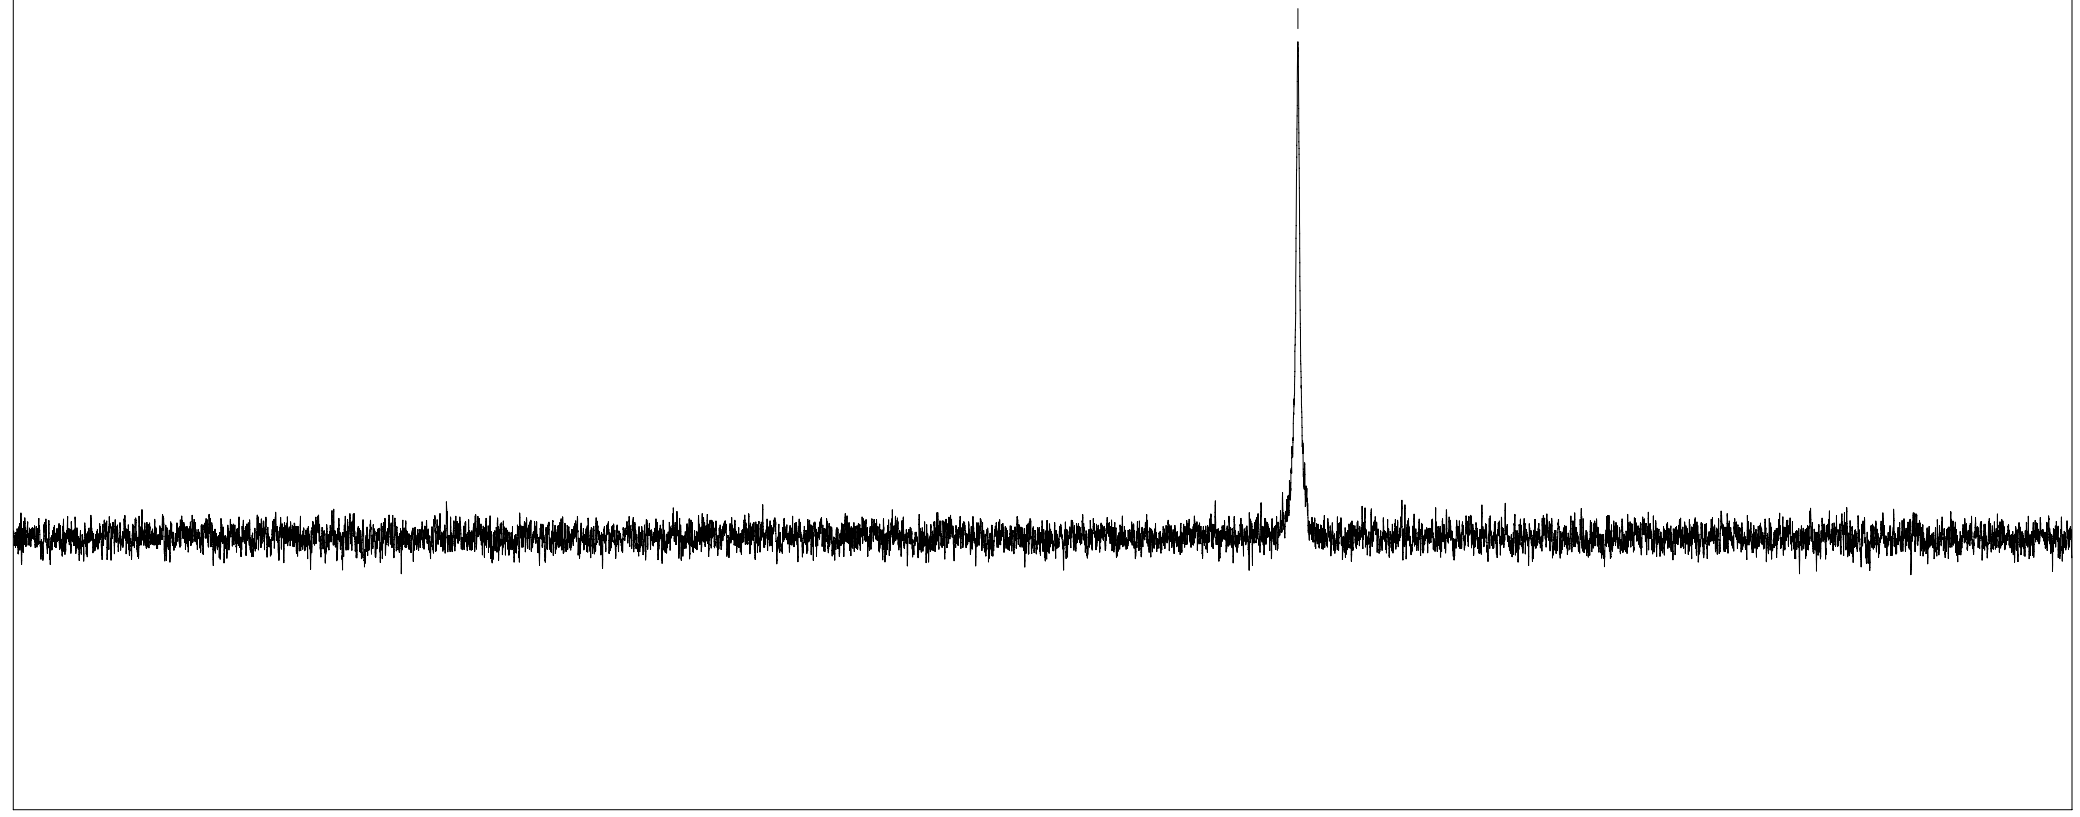

ppm (t1) 40 30 20 10 0 -10 -20 S41

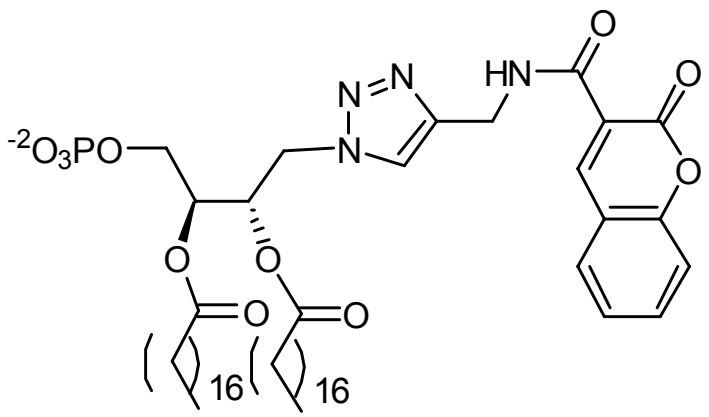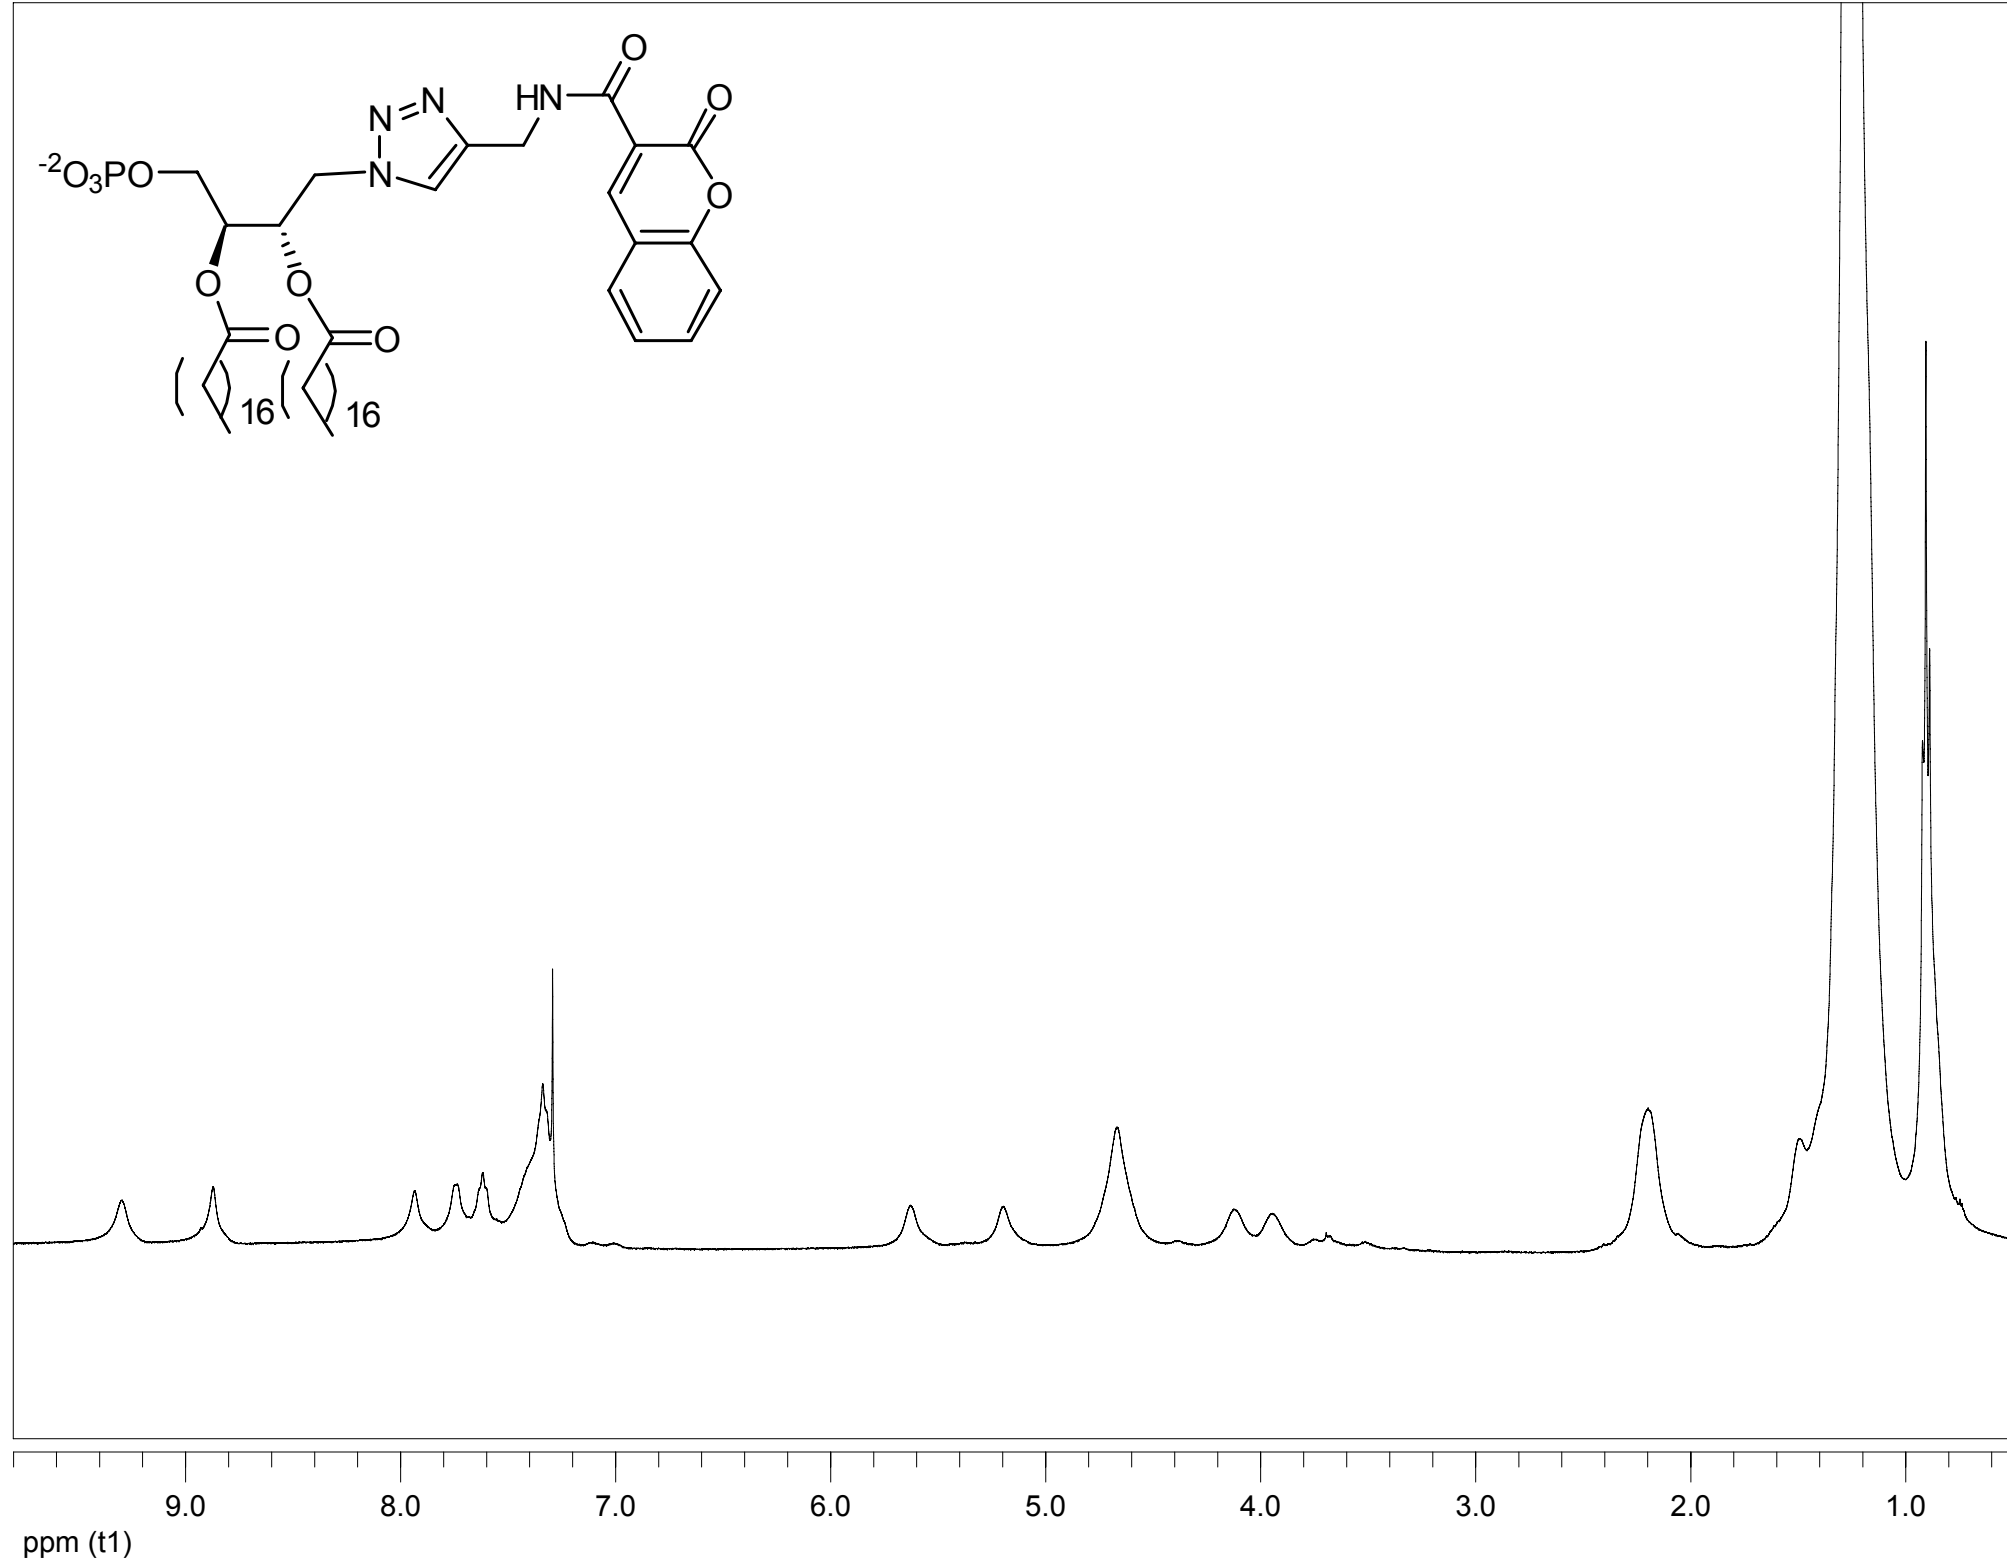

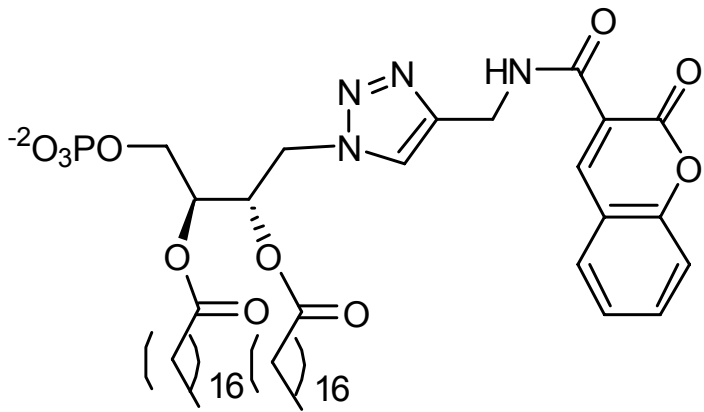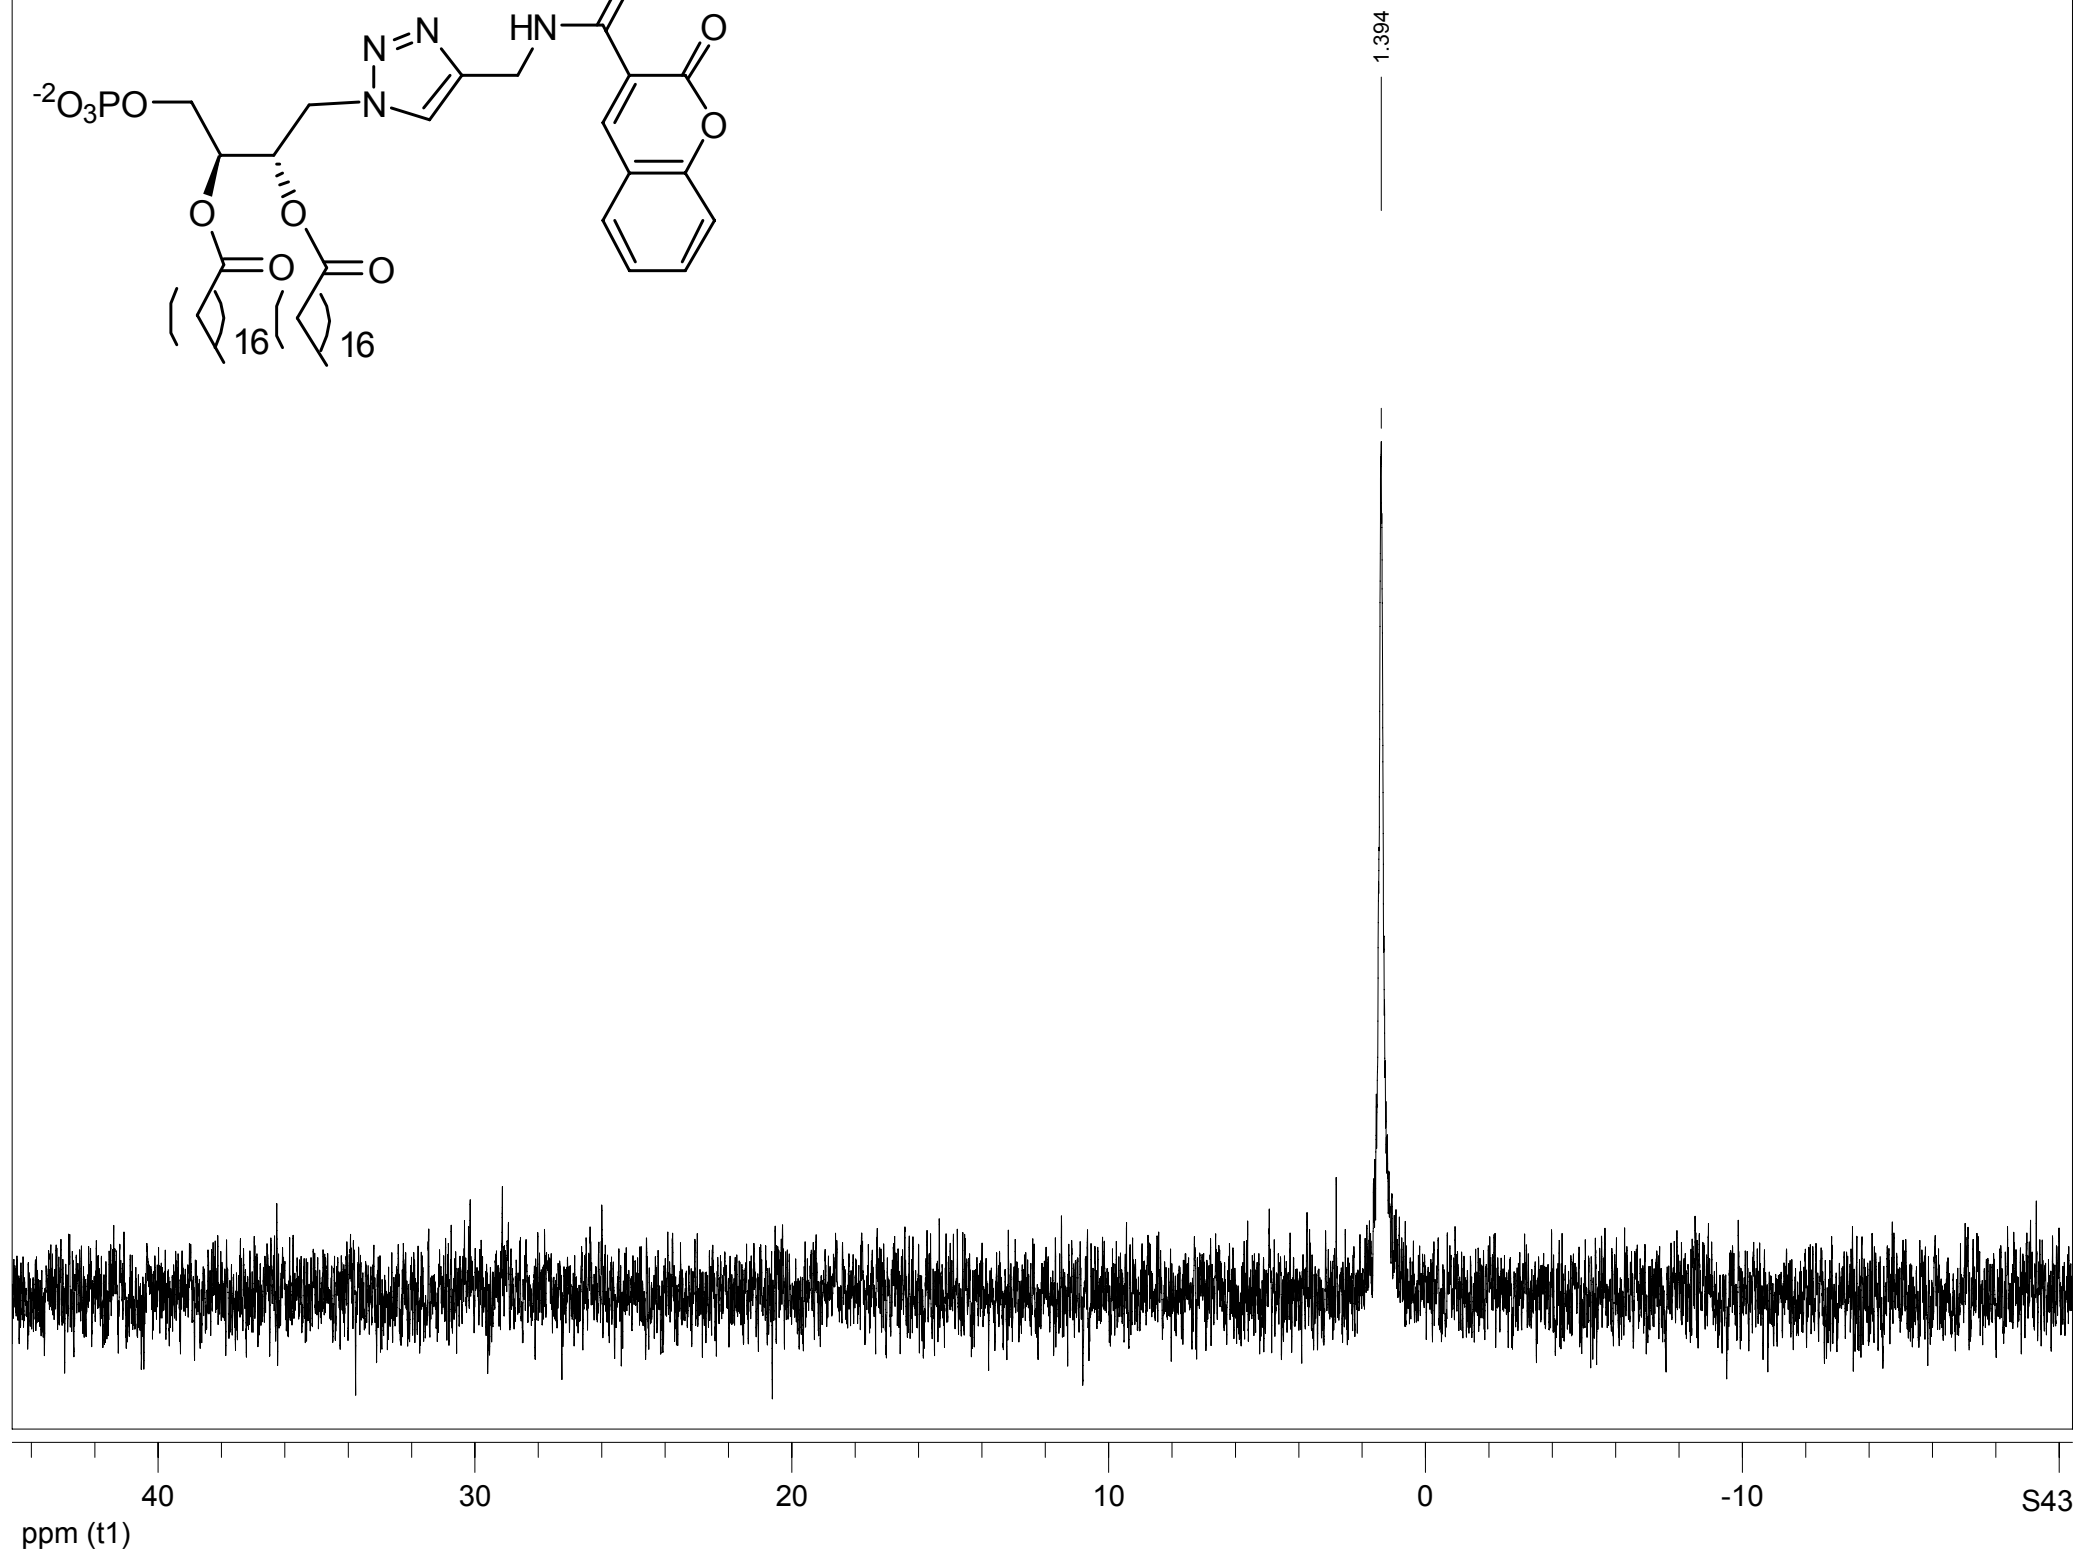

S43





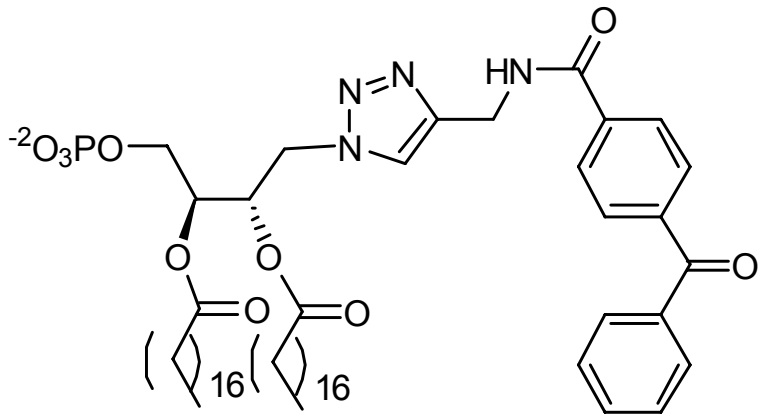

1.250

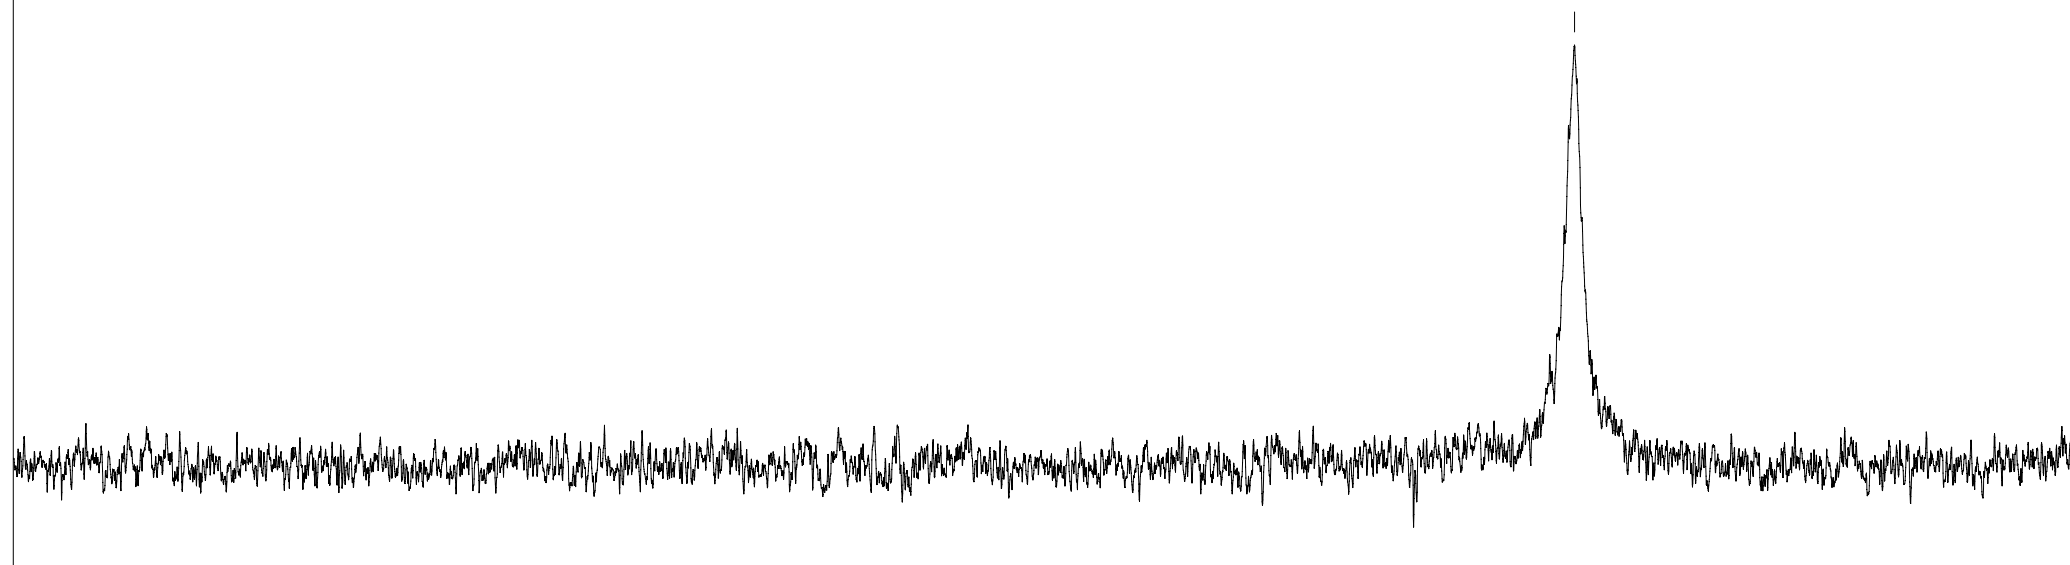

15.0 10.0 5.0 0.0 ppm (t1) S45

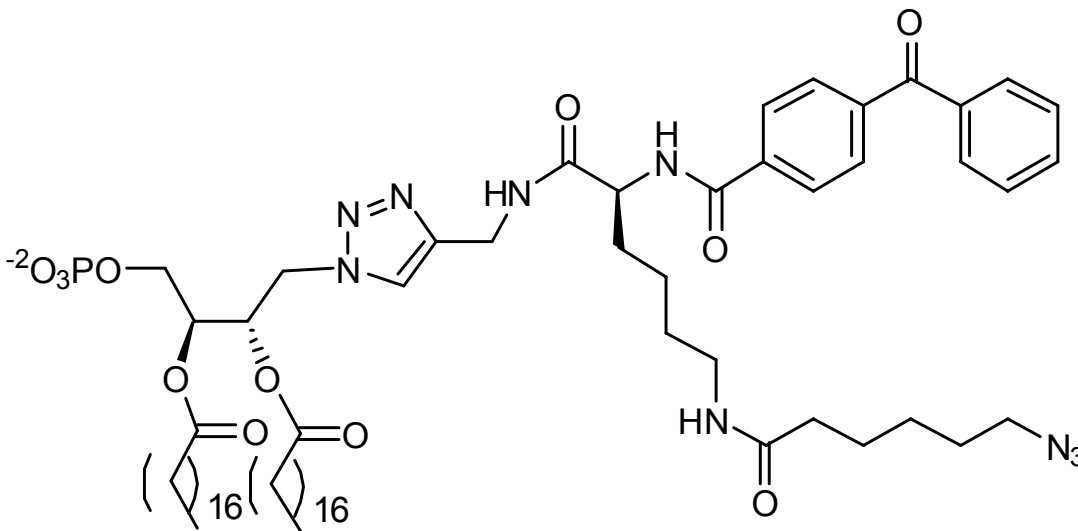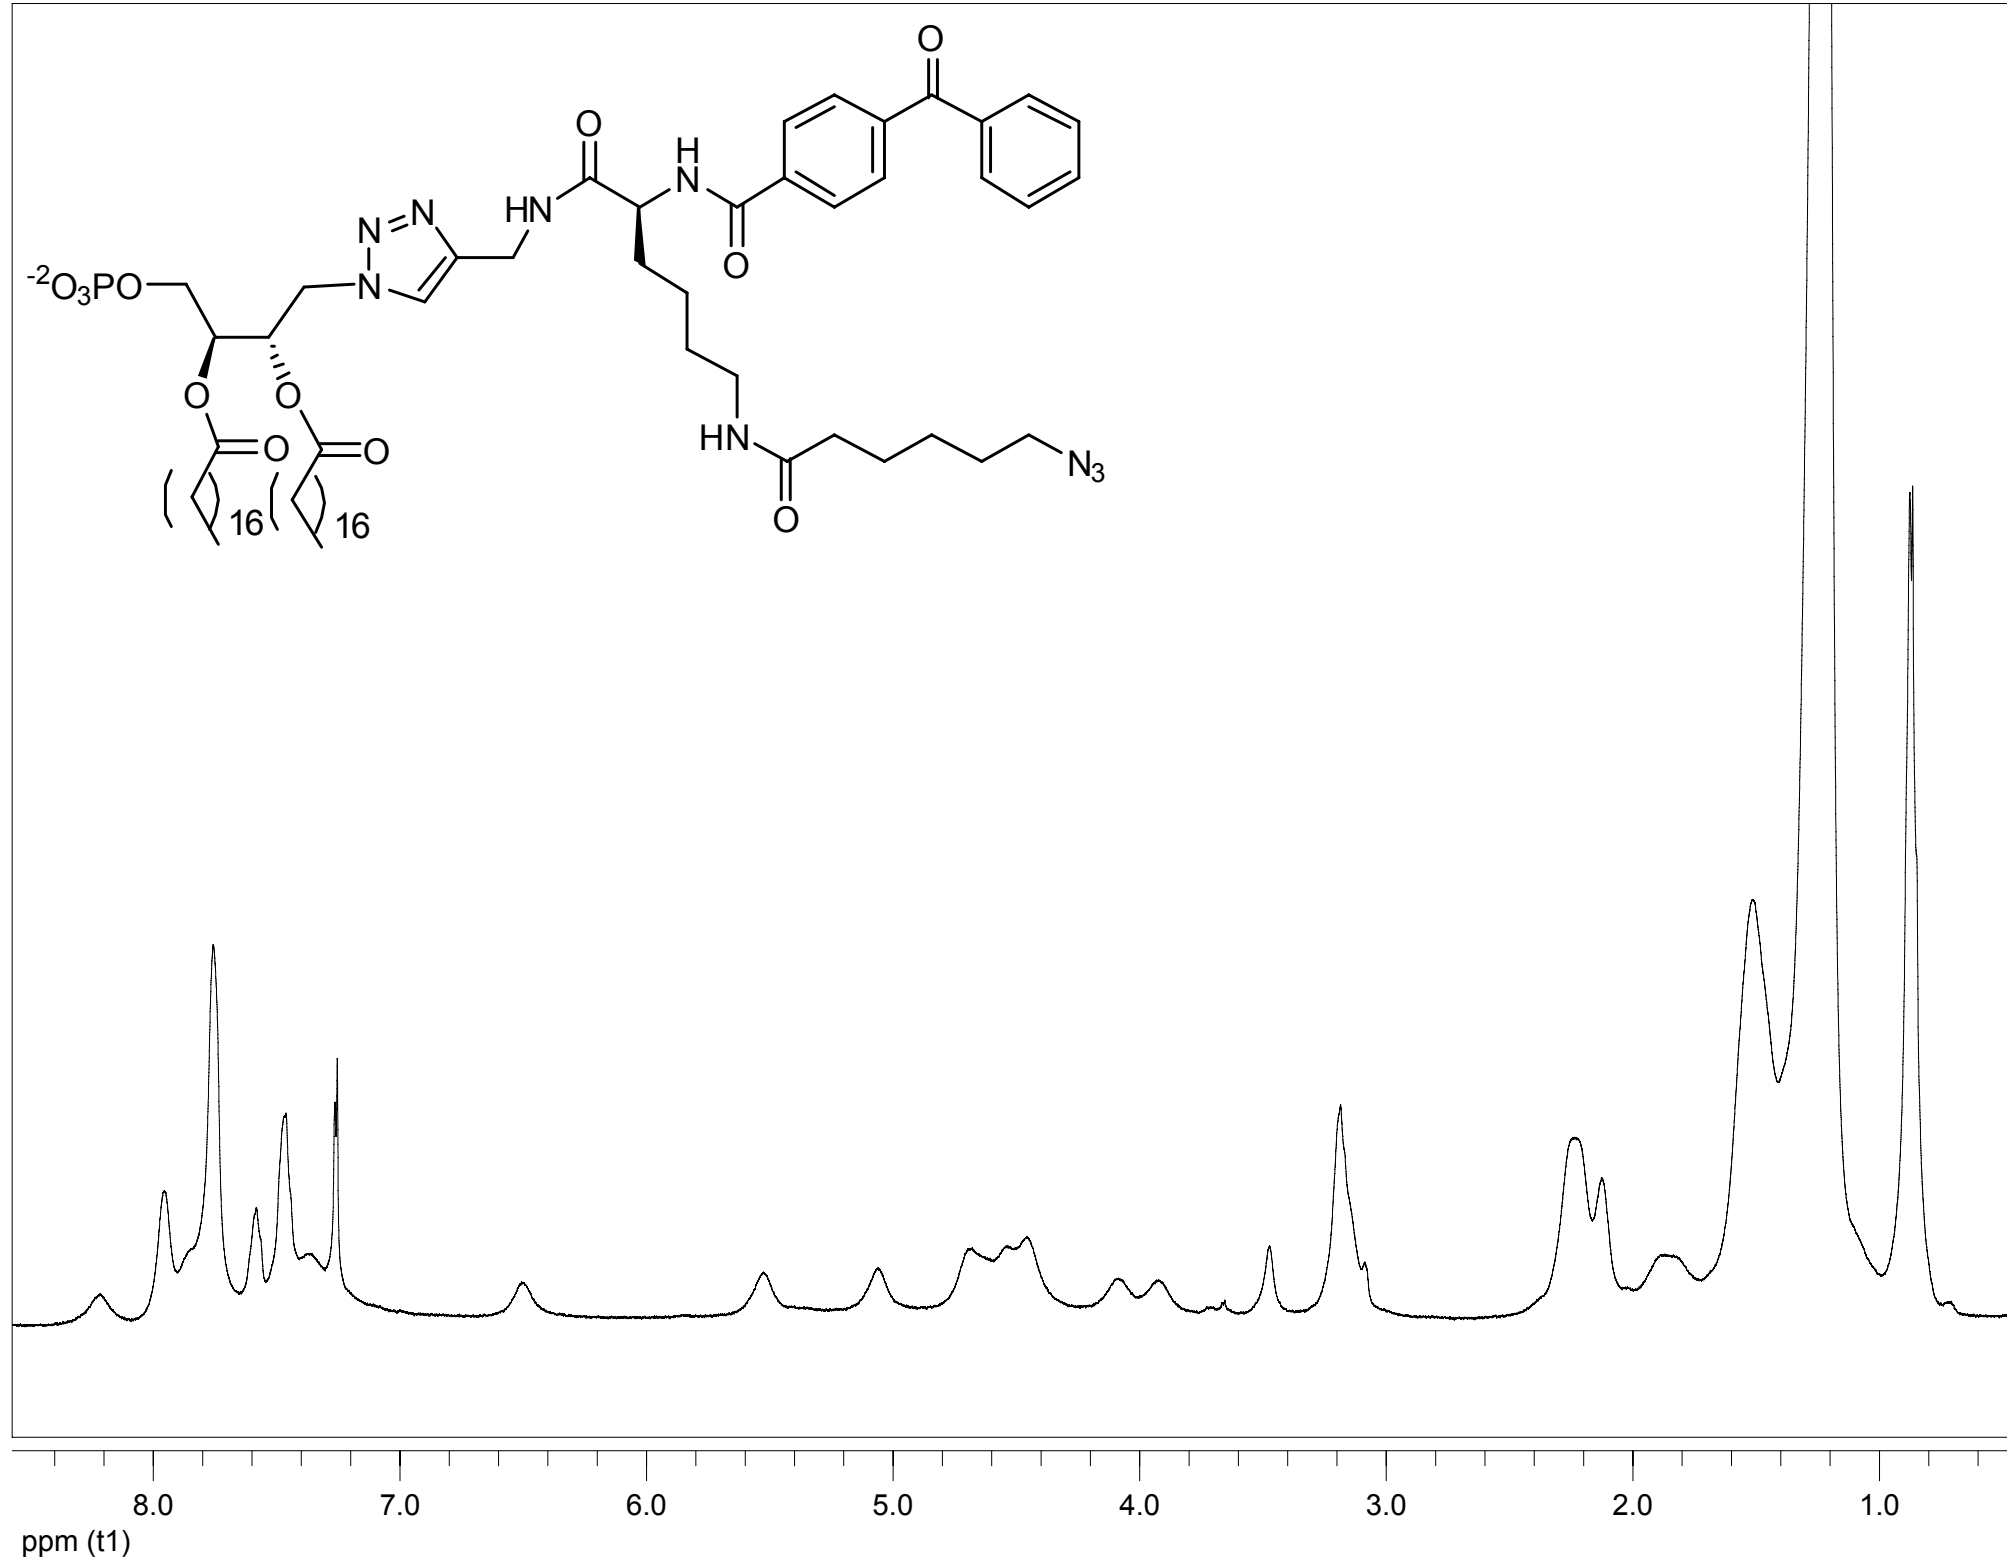



### III. HPLC Traces of Derivatized PA Probes

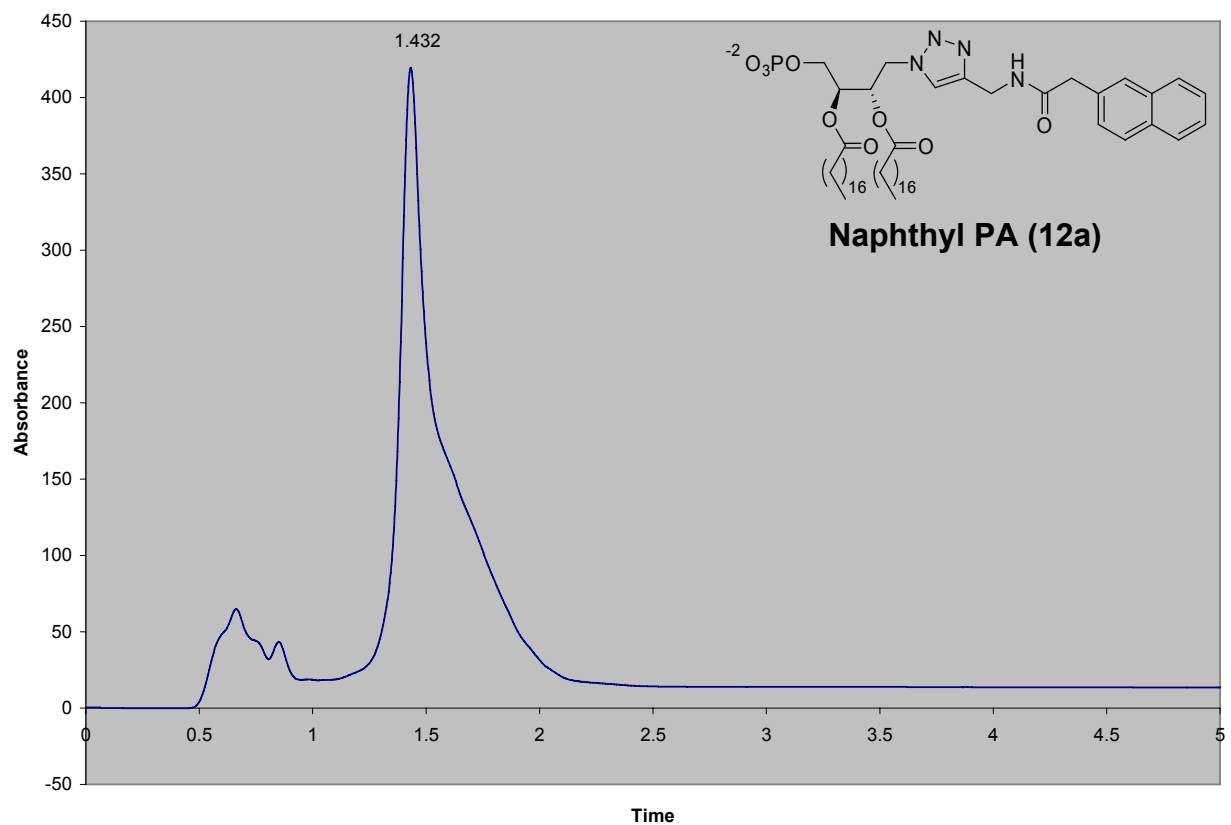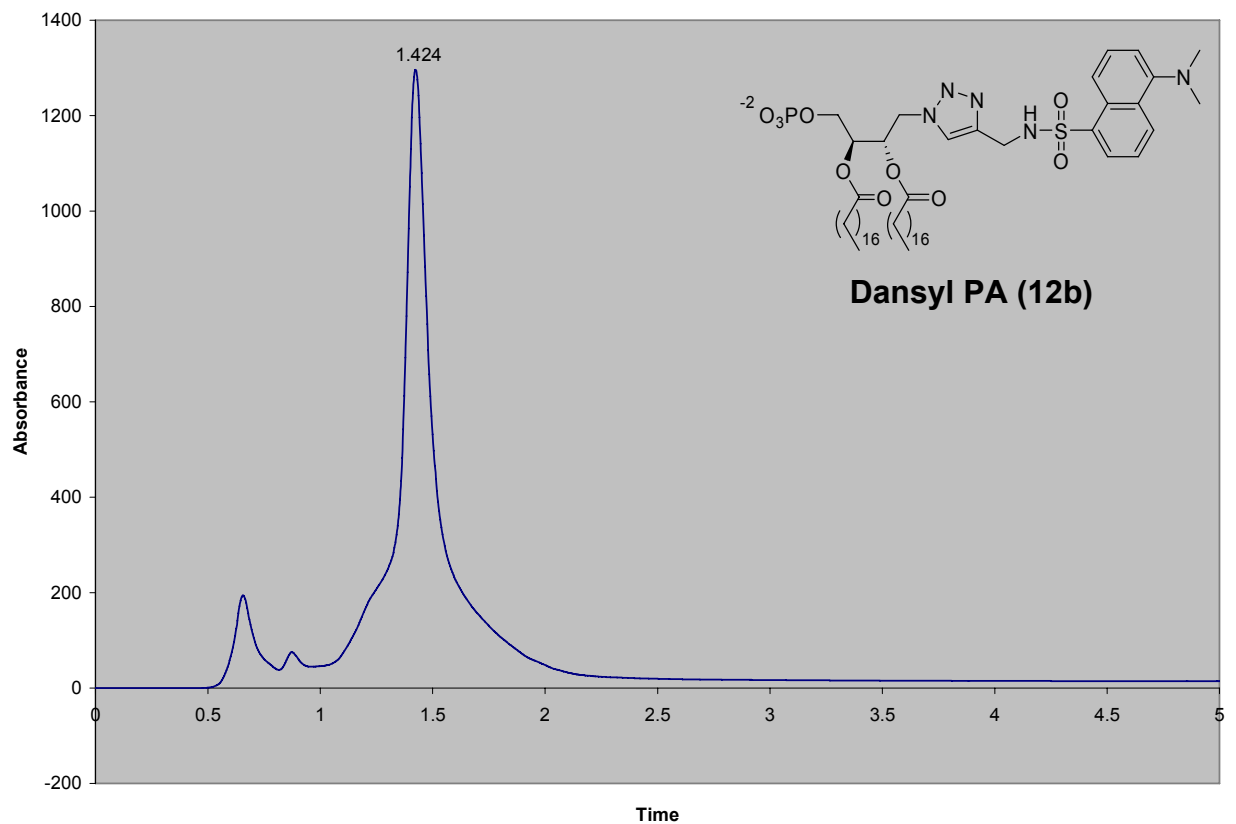



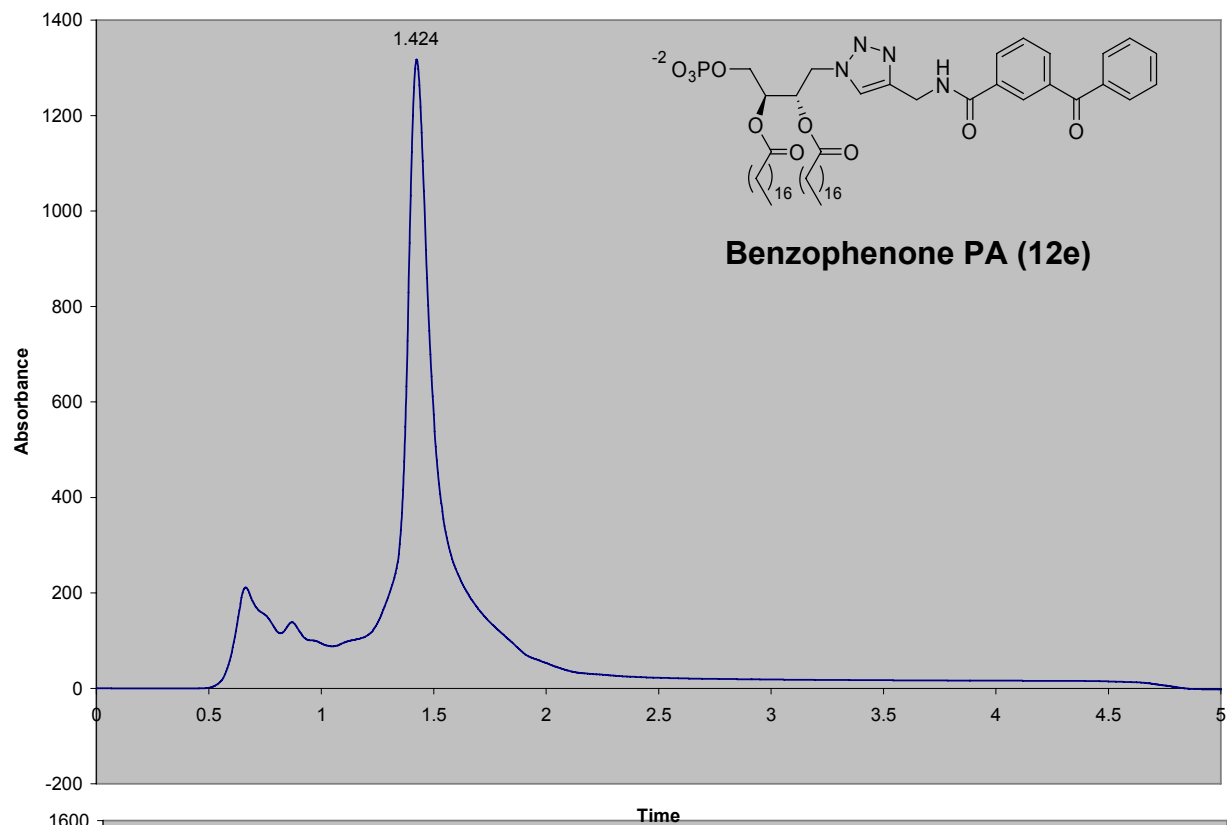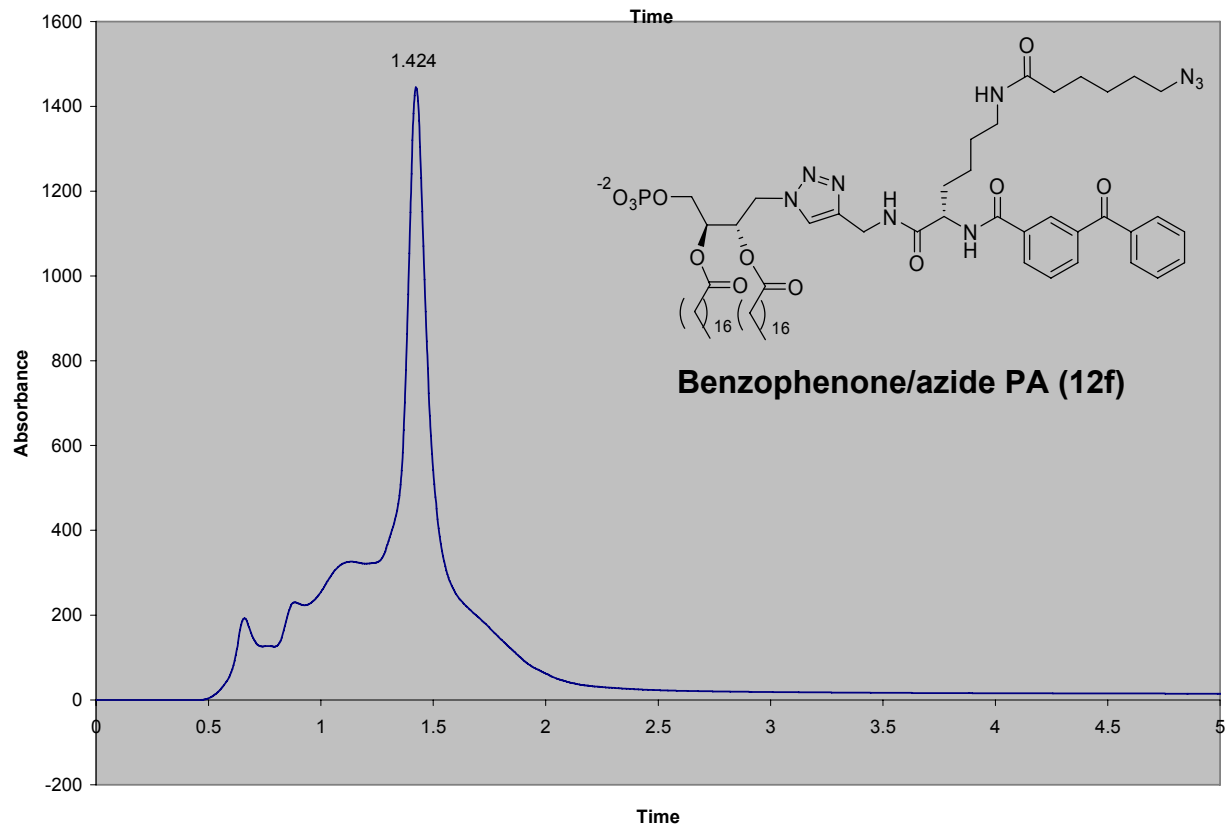

## Raw SPR spectrograms

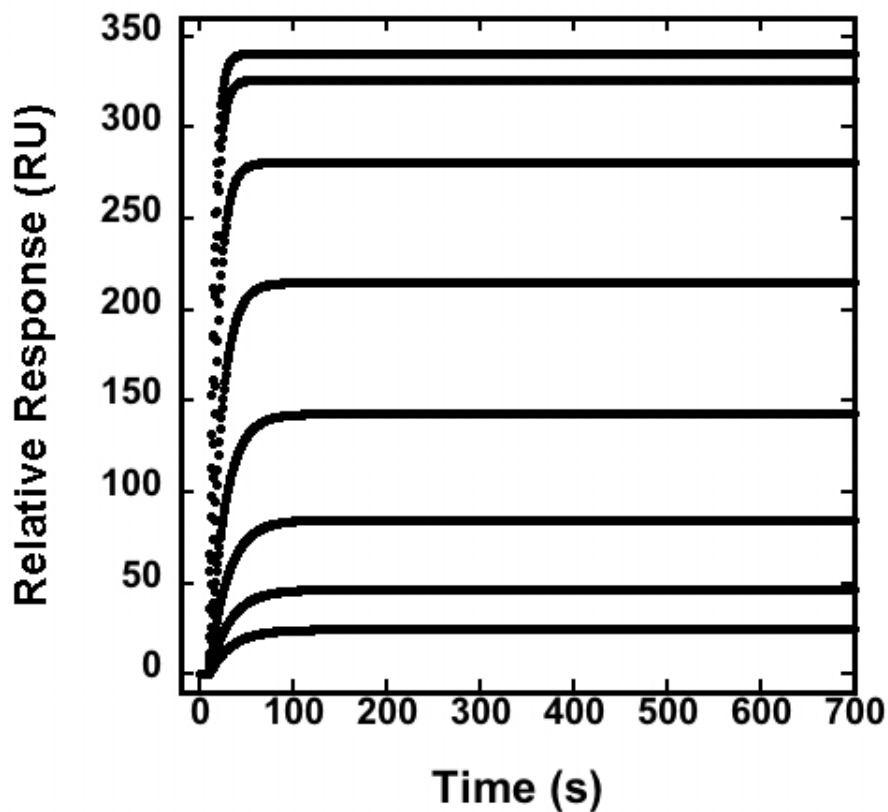

**Figure S51. Equilibrium SPR analyses of PKC $\alpha$ -C2.** The PKC $\alpha$ -C2 was injected at 10  $\mu$ l/min at varying concentrations (50, 100, 200, 400, 800, 1500, 3000, and 4000 nM from bottom to top) over the POPC:POPE:Dansyl-PA (40:40:20) surface using a POPC:POPE (50:50) surface as a control. Subtraction of the POPC:POPE (50:50) response for each protein concentration was performed to yield the binding sensorgrams shown.  $R_{eq}$  values were then measured to determine  $K_d$  by a nonlinear least-squares analysis of the binding isotherm (See Figure 3).
